# Supplementary material
Source: publisher figshare collection journal article supplement (https://acs.figshare.com/ndownloader/files/3613857)

# **Total Synthesis of (–)-*N*-Methylwelwitindolinone B Isothiocyanate via a Chlorinative Oxabicycle Ring-Opening Strategy**

Nicholas A. Weires, Evan D. Styduhar,  
Emma L. Baker, and Neil K. Garg\*

*Department of Chemistry and Biochemistry,  
University of California, Los Angeles, CA 90095*

## Supporting Information – Table of Contents

|                                                          |            |
|----------------------------------------------------------|------------|
| <b>Materials and Methods .....</b>                       | <b>S2</b>  |
| <b>Complete Reference 4r from manuscript .....</b>       | <b>S2</b>  |
| <b>Experimental Procedures .....</b>                     | <b>S3</b>  |
| <b><sup>1</sup>H and <sup>2</sup>H NMR Spectra .....</b> | <b>S15</b> |
| <b><sup>13</sup>C NMR Spectra .....</b>                  | <b>S33</b> |
| <b>2D NMR Spectrum of Oxindole 15.....</b>               | <b>S49</b> |

**Materials and Methods.** Unless stated otherwise, reactions were conducted in flame-dried glassware under an atmosphere of nitrogen using anhydrous solvents (either freshly distilled or passed through activated alumina columns). All commercially available reagents were used as received unless otherwise specified.  $\text{LiAlD}_4$  was obtained from Acros. AgOTf and Schwartz' reagent were obtained from Strem. Bathophenanthroline and selenium metal were obtained from Alfa Aesar.  $\text{Ms}_2\text{O}$  and  $\text{BCl}_3$  were obtained from Aldrich. Petasis reagent<sup>1</sup> and Dess–Martin periodinane<sup>2</sup> were prepared from known literature procedures. Unless stated otherwise, reactions were performed at room temperature (rt, approximately 23 °C). Thin-layer chromatography (TLC) was conducted with EMD gel 60 F254 pre-coated plates (0.25 mm) and visualized using a combination of UV, anisaldehyde, iodine, and potassium permanganate staining. Silicycle silica gel 60 (particle size 0.040–0.063 mm) was used for flash column chromatography.  $^1\text{H}$  and 2D NMR spectra were recorded on Bruker spectrometers (500 MHz). Data for  $^1\text{H}$  spectra are reported as follows: chemical shift ( $\delta$  ppm), multiplicity, coupling constant (Hz), integration and are referenced to the residual solvent peak 7.26 ppm for  $\text{CDCl}_3$  and 7.16 for  $\text{C}_6\text{D}_6$ . Data for  $^2\text{H}$  NMR spectra are reported as follows: chemical shift ( $\delta$  ppm, at 77 MHz), multiplicity, coupling constant, integration and are referenced to the residual solvent peak 7.26 ppm for  $\text{CDCl}_3$ .  $^{13}\text{C}$  NMR spectra are reported in terms of chemical shift (at 125 MHz) and are referenced to the residual solvent peak 77.16 ppm for  $\text{CDCl}_3$ .<sup>3</sup> IR spectra were recorded on a Perkin-Elmer 100 spectrometer and a JASCO 4100 spectrometer and are reported in terms of frequency absorption ( $\text{cm}^{-1}$ ). Optical rotations were measured with a Rudolph Autopol III Automatic Polarimeter. Uncorrected melting points were measured using a Mel-Temp II melting point apparatus with a Fluke 50S thermocouple and a Digimelt MPA160 melting point apparatus. High resolution mass spectra were obtained from the UC Irvine Mass Spectrometry Facility and the UCLA Molecular Instrumentation Center.

#### Complete Reference 4r from manuscript:

Freeman, D. B.; Holubec, A. A.; Weiss, M. W.; Dixon, J. A.; Kafefuda, A.; Ohtsuka, M.; Inoue, M.; Vaswani R. G.; Ohki, H.; Doan, B. D.; Reisman, S. E.; Stoltz, B. M.; Day, J. J.; Tao, R. N.; Dieterich, N. A.; Wood, J. L. *Tetrahedron* **2010**, *66*, 6647–6655.

<sup>1</sup> Payack, J. F.; Hughed, D. L.; Cai, D.; Cottrell, I. F.; Verhoeven, T. R. *Org. Synth.* **2002**, *79*, 19–22.

<sup>2</sup> Niu, C.; Pettersson, T.; Miller, M. J. *J. Org. Chem.* **1996**, *61*, 1014–1022.

<sup>3</sup> For compound **2** the  $^{13}\text{C}$  NMR residual solvent peak is set to 77.0 ppm to match the reference values set in the isolation paper.

## Experimental Procedures.

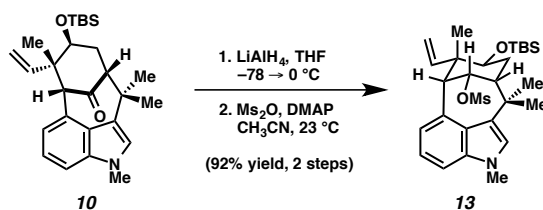

**Mesylate 13.** To a solution of indole **10**<sup>4</sup> (500 mg, 1.14 mmol, 1.0 equiv) in THF (38.0 mL) at  $-78 ^\circ\text{C}$  was added a solution of  $\text{LiAlH}_4$  (1.0 M in THF, 3.44 mL, 3.44 mmol, 3.0 equiv) in a dropwise manner. After stirring at  $-78 ^\circ\text{C}$  for 5 min, the solution was then allowed to warm to  $0 ^\circ\text{C}$ . After 20 min, the reaction was slowly quenched at  $0 ^\circ\text{C}$  by the dropwise addition of a saturated solution of aqueous Rochelle's salt (30 mL), and then allowed to warm to  $23 ^\circ\text{C}$ . The resulting biphasic mixture was stirred at room temperature for 30 min, transferred to a separatory funnel with EtOAc (30 mL) and  $\text{H}_2\text{O}$  (30 mL), and extracted with EtOAc (3 x 20 mL). The organic layers were combined, dried over  $\text{Na}_2\text{SO}_4$ , and evaporated under reduced pressure. The resulting residue was used in the subsequent step without further purification.

To a flask containing the crude product (382 mg, 0.87 mmol, 1.0 equiv) from the previous step was added DMAP (637 mg, 5.22 mmol, 6.0 equiv) and  $\text{Ms}_2\text{O}$  (409 mg, 2.35 mmol, 2.7 equiv) as solids. The flask was flushed with  $\text{N}_2$ , and  $\text{CH}_3\text{CN}$  (7.77 mL) was added. The reaction mixture was allowed to stir at room temperature. After 2 h the reaction was filtered by passage through a plug of silica gel (5:1 hexanes:EtOAc eluent) to afford mesylate **13** (413 mg, 92% yield, over two steps) as a white foam. Mesylate **13**: mp:  $71.5 ^\circ\text{C}$ ;  $R_f$  0.53 (5:1 hexanes:EtOAc);  $^1\text{H}$  NMR (500 MHz,  $\text{CDCl}_3$ ):  $\delta$  7.17 (dd,  $J = 8.1, 0.6$ , 1H), 7.06 (dd,  $J = 8.1, 7.2$ , 1H), 6.95 (s, 1H), 6.66 (d,  $J = 7.1$ , 1H), 5.79 (app t,  $J = 5.8$ , 1H), 4.92 (dd,  $J = 17.5, 1.1$ , 1H), 4.78 (dd,  $J = 11.0, 1.1$ , 1H), 4.44 (dd,  $J = 17.4, 10.9$ , 1H), 4.77 (s, 3H), 3.64 (dd,  $J = 12.3, 4.2$ , 1H), 3.33 (d,  $J = 5.4$ , 1H), 2.85 (s, 3H), 2.55–2.48 (m, 1H), 2.18 (ddd,  $J = 14.7, 4.0, 2.7$ , 1H), 1.95 (ddd,  $J = 14.7, 12.4, 5.6$ , 1H), 1.57 (s, 3H), 1.42 (s, 3H), 1.36 (s, 3H), 0.73 (s, 9H),  $-0.16$  (s, 3H),  $-0.38$  (s, 3H);  $^{13}\text{C}$  NMR (125 MHz,  $\text{CDCl}_3$ ):  $\delta$  146.8, 136.7, 130.5, 126.4, 125.7, 124.4, 124.2, 120.5, 112.5, 107.8, 82.4, 68.2, 57.7, 49.2, 48.7, 40.5, 39.1, 37.4, 33.0, 32.8, 32.0, 25.9, 18.0, 16.1,  $-4.0$ ,  $-4.6$ ; IR (film): 2952, 2895, 1607, 1533, 1472  $\text{cm}^{-1}$ ; HRMS-ESI ( $m/z$ )  $[\text{M} + \text{H}]^+$  calcd for  $\text{C}_{28}\text{H}_{44}\text{NO}_4\text{SSi}$ , 518.27603; found 518.27472;  $[\alpha]^{21.6}_{\text{D}} +59.60^\circ$  ( $c = 1.000$ ,  $\text{CHCl}_3$ ).

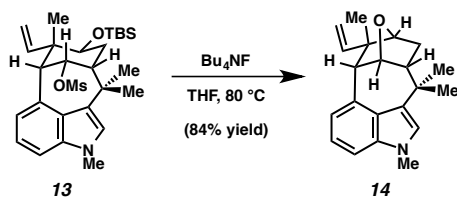

<sup>4</sup> Hutters, A. D.; Quasdorf, K. W.; Styduhar, E. D.; Garg, N. K. *J. Am. Chem. Soc.* **2011**, *133*, 15797–15799.

**Oxabicycle 14.** To a Schlenk tube containing a solution of mesylate **13** (118 mg, 0.23 mmol, 1.0 equiv) in THF (5.8 mL) was added TBAF (1.0 M in THF, 681  $\mu$ L, 0.68 mmol, 3.0 equiv) in a dropwise manner. The Schlenk tube was then sealed and heated to 80 °C. After 21 h, the solution was allowed to cool to 23 °C and then filtered by passage over a plug of silica gel (EtOAc eluent, 30 mL). The filtrate was concentrated and the resulting residue was purified by flash chromatography (9:1 hexanes:EtOAc) to afford oxabicycle **14** (56 mg, 84% yield) as a white solid. Oxabicycle **14**: mp: 108.8 °C;  $R_f$  0.66 (3:1 hexanes:EtOAc);  $^1\text{H}$  NMR (500 MHz,  $\text{CDCl}_3$ ):  $\delta$  7.16–7.08 (m, 2H), 6.91 (s, 1H), 6.72 (d,  $J$  = 6.4, 1H), 4.93 (app t,  $J$  = 4.4, 1H), 4.75–4.71 (m, 1H), 4.65–4.59 (m, 1H), 4.55–4.52 (m, 1H), 4.16 (d,  $J$  = 6.1, 1H), 3.75 (s, 3H), 3.46 (d,  $J$  = 5.3, 1H), 2.44–2.34 (m, 1H), 1.89–1.83 (ddd,  $J$  = 23.8, 11.8, 6.3, 1H), 1.64–1.60 (dd,  $J$  = 12.4, 8.5, 1H), 1.43 (s, 3H), 1.37 (s, 3H), 1.23 (s, 3H);  $^{13}\text{C}$  NMR (500 MHz,  $\text{CDCl}_3$ )  $\delta$  140.7, 137.4, 131.3, 126.2, 124.6, 122.0, 121.5, 120.5, 114.3, 107.3, 87.2, 82.2, 59.8, 55.7, 53.0, 35.9, 34.9, 32.9, 28.7, 28.4, 27.5; IR (film): 2962, 2904, 2864, 1632, 1541, 1456  $\text{cm}^{-1}$ ; HRMS-ESI ( $m/z$ )  $[\text{M} + \text{H}]^+$  calcd for  $\text{C}_{21}\text{H}_{26}\text{NO}$ , 308.20144; found 308.20022;  $[\alpha]_D^{21.4} +115.40^\circ$  ( $c$  = 1.000,  $\text{CHCl}_3$ ).

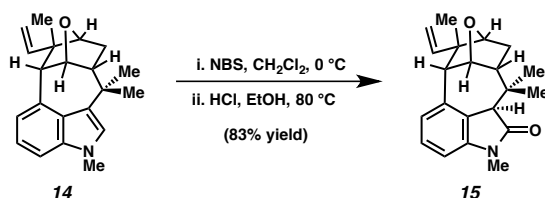

( $m/z$ ) [ $M + H$ ]<sup>+</sup> calcd for C<sub>21</sub>H<sub>26</sub>NO<sub>2</sub>, 324.19635; found 324.19514; [ $\alpha$ ]<sub>D</sub><sup>21.4</sup> +28.20° ( $c$  = 1.000, CHCl<sub>3</sub>).

The structure of **15** was confirmed by a 2D-NOESY experiment, as the following interactions were observed:

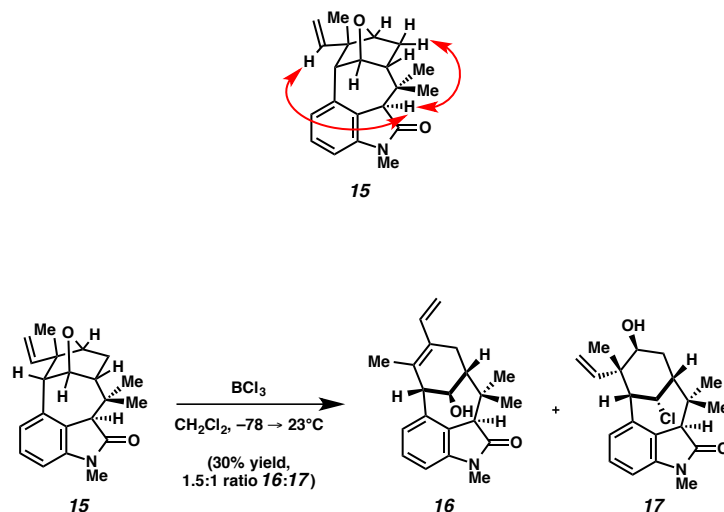

**Diene 16 and Alkyl Chloride 17.** A solution of oxindole **15** (6.1 mg, 0.019 mmol, 1.0 equiv) in CH<sub>2</sub>Cl<sub>2</sub> (1.89 mL) was cooled to –78 °C. A solution of BCl<sub>3</sub> (1.0 M in CH<sub>2</sub>Cl<sub>2</sub>, 145.4  $\mu$ L, 0.14 mmol, 7.7 equiv) was added in a dropwise manner. The resulting solution was allowed to stir at –78 °C. After 30 min, the solution was allowed to warm to 0 °C. After 2 additional hours, the solution was warmed to room temperature. After 4 h, the reaction was quenched by the addition of a saturated aqueous solution of NaHCO<sub>3</sub> (1 mL), transferred to a separatory funnel with EtOAc (6 mL) and H<sub>2</sub>O (4 mL), and extracted with EtOAc (3 x 3 mL). The organic layers were combined, dried over Na<sub>2</sub>SO<sub>4</sub>, and evaporated under reduced pressure. The resulting residue was purified by preparative thin layer chromatography (1:1 hexanes:EtOAc) to afford diene **16** (1.1 mg, 18% yield) and alkyl chloride **17** (0.8 mg, 12% yield) as amorphous solids. Diene **16**: R<sub>f</sub> 0.60 (1:1 hexanes:EtOAc); <sup>1</sup>H NMR (500 MHz, CDCl<sub>3</sub>):  $\delta$  7.21 (ddd,  $J$  = 7.8, 7.8, 0.6, 1H), 6.91 (d,  $J$  = 7.3, 1H), 6.76 (dd,  $J$  = 17.2, 11.0, 1H), 6.67 (d,  $J$  = 7.8, 1H), 5.32 (d,  $J$  = 17.2, 1H), 5.09 (d,  $J$  = 11.1, 1H), 4.24 (br. s, 1H), 3.32 (s, 1H), 3.25 (s, 1H), 3.14 (s, 3H), 2.73 (d,  $J$  = 18.7, 1H), 2.56 (dd,  $J$  = 18.7, 7.9, 1H), 2.02 (d,  $J$  = 7.9, 1H), 1.79 (d,  $J$  = 6.7, 1H), 1.68 (s, 3H), 1.54 (s, 3H), 0.73 (s, 3H); <sup>13</sup>C NMR (125 MHz, CDCl<sub>3</sub>):  $\delta$  176.4, 144.4, 135.8, 134.0, 128.9, 128.1, 126.6, 126.4, 123.5, 112.9, 106.4, 67.5, 54.4, 50.9, 49.1, 39.0, 28.0, 26.1, 22.5, 21.2, 17.8; IR (film): 3412, 2969, 1690, 1608, 1470 cm<sup>–1</sup>; HRMS-ESI ( $m/z$ ) [ $M + H$ ]<sup>+</sup> calcd for C<sub>21</sub>H<sub>26</sub>NO<sub>2</sub>, 324.19635; found 324.19417; [ $\alpha$ ]<sub>D</sub><sup>21.4</sup> –264.00° ( $c$  = 0.150, CHCl<sub>3</sub>).

Alkyl chloride **17**: R<sub>f</sub> 0.52 (1:1 hexanes:EtOAc); <sup>1</sup>H NMR (500 MHz, CDCl<sub>3</sub>, 25 of 26 observed):  $\delta$  7.16 (ddd,  $J$  = 7.8, 7.8, 0.7, 1H), 6.68 (dd,  $J$  = 7.8, 0.7, 1H), 6.65 (d,  $J$  = 7.7, 1H), 5.31 (dd,  $J$  = 17.4, 10.7, 1H), 5.12 (dd,  $J$  = 17.4, 1.0, 1H), 5.03 (dd,  $J$  = 10.7, 1.0, 1H), 4.69 (br. s, 1H), 4.12 (dd,  $J$  = 10.3, 7.1, 1H), 3.57 (s, 1H), 3.20–3.18 (m, 1H), 3.17 (s, 3H), 2.37–2.32 (m, 2H), 2.28–2.25 (m, 1H), 1.67 (s, 3H), 1.57 (s, 3H), 0.89 (s, 3H);

$^{13}\text{C}$  NMR (125 MHz,  $\text{CDCl}_3$ ):  $\delta$  175.2, 146.3, 145.0, 138.7, 128.0, 126.8, 124.1, 114.8, 106.8, 69.7, 59.3, 58.2, 56.8, 54.8, 46.5, 39.4, 27.3, 26.3, 25.3, 23.3, 19.0; IR (film): 3451, 2962, 2872, 1699, 1609  $\text{cm}^{-1}$ ; HRMS-ESI ( $m/z$ ) [ $\text{M} + \text{H}$ ] $^+$  calcd for  $\text{C}_{21}\text{H}_{27}\text{ClNO}_2$ , 360.17303; found 360.17087;  $[\alpha]_{\text{D}}^{21.2} -9.00^\circ$  ( $c = 0.400$ ,  $\text{CHCl}_3$ ).

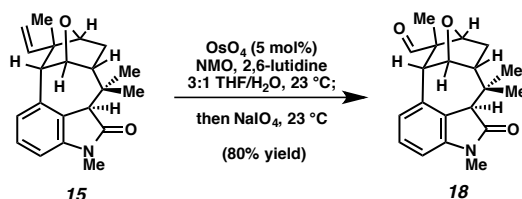

**Aldehyde 18.** To a solution of oxindole **15** (45 mg, 0.14 mmol, 1.0 equiv) in a 3:1 mixture of THF/ $\text{H}_2\text{O}$  (1.4 mL) was added 2,6-lutidine (32  $\mu\text{L}$ , 0.28 mmol, 2.0 equiv),  $\text{OsO}_4$  (20 mg/mL in  $\text{H}_2\text{O}$ , 84  $\mu\text{L}$ , 0.007 mmol, 0.05 equiv), and NMO (65 mg, 0.56 mmol, 4.0 equiv). The vial was flushed with  $\text{N}_2$ , sealed and stirred at room temperature. After 19 h, solid  $\text{NaIO}_4$  (89 mg, 0.42 mmol, 3.0 equiv) was added in one portion and the reaction mixture was stirred at room temperature. After 13 min, the reaction mixture was quenched with a saturated aqueous solution of  $\text{Na}_2\text{S}_2\text{O}_3$  (1 mL) and stirred vigorously at room temperature. After 30 min the resulting mixture was transferred to a test tube with EtOAc (5 mL) and  $\text{H}_2\text{O}$  (5 mL). The resulting biphasic mixture was extracted with EtOAc (3 x 3 mL). The organic layers were combined, dried over  $\text{Na}_2\text{SO}_4$ , and evaporated under reduced pressure. The resulting residue was purified by preparative thin layer chromatography (3:1 hexanes:EtOAc) to afford aldehyde **18** (36 mg, 80% yield) as a white solid. Aldehyde **18**: mp: 181.1  $^\circ\text{C}$ ;  $R_f$  0.53 (1:1 hexanes:EtOAc);  $^1\text{H}$  NMR (500 MHz,  $\text{CDCl}_3$ ):  $\delta$  9.17 (s, 1H), 7.24 (dd,  $J = 7.7, 7.7$ , 1H), 6.89 (d,  $J = 7.7$ , 1H), 6.74 (d,  $J = 7.8$ , 1H), 4.55 (t,  $J = 4.9$ , 1H), 4.47 (d,  $J = 5.0$ , 1H), 3.26 (s, 1H), 3.18–3.16 (m, 4H), 2.37–2.29 (m, 1H), 2.16–2.07 (m, 2H), 1.43 (s, 3H), 1.37 (s, 3H), 0.74 (s, 3H);  $^{13}\text{C}$  NMR (125 MHz,  $\text{CDCl}_3$ ):  $\delta$  204.6, 175.9, 144.7, 131.8, 128.8, 125.65, 125.60, 107.4, 84.6, 81.0, 59.1, 58.9, 56.0, 49.3, 36.9, 28.2, 27.5, 26.4, 25.4, 23.2; IR (film): 2959, 2928, 1708, 1606, 1470  $\text{cm}^{-1}$ ; HRMS-ESI ( $m/z$ ) [ $\text{M} + \text{H}$ ] $^+$  calcd for  $\text{C}_{20}\text{H}_{24}\text{NO}_3$ , 326.17562; found 326.17443;  $[\alpha]_{\text{D}}^{21.6} +23.80^\circ$  ( $c = 1.000$ ,  $\text{CHCl}_3$ ).

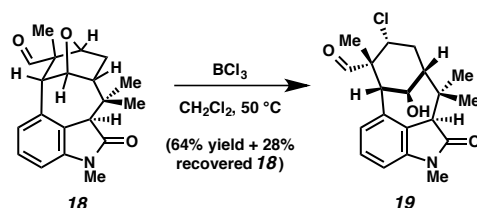

**Alkyl Chloride 19.** To a scintillation vial containing oxindole **18** (19.3 mg, 0.059 mmol, 1.0 equiv) was added a solution of  $\text{BCl}_3$  (1.0 M in  $\text{CH}_2\text{Cl}_2$ , 178.2  $\mu\text{L}$ , 0.178 mmol, 3.0 equiv) in a dropwise manner. The reaction vial was then sealed and heated to 50  $^\circ\text{C}$ . After 2 h, the solution was allowed to cool to 23  $^\circ\text{C}$ , and quenched by the addition of a

saturated aqueous solution of  $\text{NaHCO}_3$  (1 mL), transferred to a separatory funnel with EtOAc (6 mL) and  $\text{H}_2\text{O}$  (6 mL), and extracted with EtOAc (3 x 3 mL). The organic layers were combined, dried over  $\text{Na}_2\text{SO}_4$ , and evaporated under reduced pressure. The resulting residue was purified by preparative thin layer chromatography (1:1 hexanes:EtOAc) to afford alkyl chloride **19** (13.7 mg, 64% yield) as a white solid and recovered oxindole **18** (5.4 mg, 28% yield). Alkyl chloride **19**: mp: 176.4 °C;  $R_f$  0.42 (1:1 hexanes:EtOAc);  $^1\text{H}$  NMR (500 MHz,  $\text{CDCl}_3$ ):  $\delta$  9.29 (s, 1H), 7.18 (dd,  $J = 7.7, 7.7$ , 1H), 6.75 (d,  $J = 7.7$ , 1H), 6.70 (d,  $J = 7.8$ , 1H), 5.13–5.04 (m, 1H), 4.18 (s, 1H), 3.47 (s, 1H), 3.24–3.21 (m, 1H), 3.16 (s, 3H), 2.61–2.56 (m, 2H), 2.20–2.16 (m, 1H) 1.90 (s, 1H), 1.58 (s, 3H), 1.56 (s, 3H), 0.88 (s, 3H);  $^{13}\text{C}$  NMR (125 MHz,  $\text{CDCl}_3$ ):  $\delta$  200.3, 175.8, 144.9, 133.8, 128.9, 125.1, 124.8, 107.5, 69.6, 61.8, 57.4, 53.8, 51.6, 50.5, 39.5, 31.3, 26.4, 26.1, 25.9, 22.8; IR (film): 3443, 2967, 1689, 1609, 1594  $\text{cm}^{-1}$ ; HRMS-ESI ( $m/z$ )  $[\text{M} + \text{H}]^+$  calcd for  $\text{C}_{20}\text{H}_{25}\text{ClNO}_3$ , 362.15230; found 362.15085;  $[\alpha]^{23.0}_{\text{D}} +59.60^\circ$  ( $c = 1.000$ ,  $\text{CHCl}_3$ ).

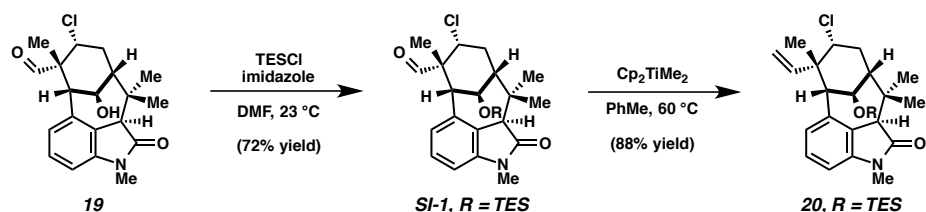

**Silyl Ether 20.** To a solution of **19** (18.8 mg, 0.052 mmol, 1.0 equiv) in DMF (944  $\mu\text{L}$ ) was added imidazole (35.3 mg, 0.52 mmol, 3.0 equiv). The reaction vial was then purged with  $\text{N}_2$  and TESCl (26.2  $\mu\text{L}$ , 0.156 mmol, 3.0 equiv) was added in a dropwise manner. The resulting solution was stirred at room temperature. After 1 h the reaction was quenched by the addition of a saturated aqueous solution of  $\text{NaHCO}_3$  (2 mL) and transferred to a separatory funnel with EtOAc (6 mL) and  $\text{H}_2\text{O}$  (4 mL). After extracting with EtOAc (3 x 3 mL), the organic layers were combined, dried over  $\text{Na}_2\text{SO}_4$ , and evaporated under reduced pressure. The resulting residue was purified by preparative thin layer chromatography (1:1 hexanes:EtOAc) to afford **SI-1** (18 mg, 72% yield) as an amorphous solid. **SI-1**:  $R_f$  0.69 (1:1 hexanes:EtOAc);  $^1\text{H}$  NMR (500 MHz,  $\text{CDCl}_3$ ):  $\delta$  9.30 (s, 1H), 7.18 (ddd,  $J = 7.8, 7.7, 0.65$ , 1H), 6.72 (d,  $J = 7.6$ , 1H), 6.70 (d,  $J = 7.8$ , 1H), 5.12–5.03 (m, 1H), 4.10–4.04 (m, 1H), 3.46 (s, 1H), 3.16 (s, 3H), 3.14–3.10 (m, 1H), 2.61–2.51 (m, 2H), 2.19–2.11 (m, 1H), 1.55 (s, 3H), 1.54 (s, 3H), 0.96 (t,  $J = 7.9$ , 9H), 0.86 (s, 3H), 0.59 (q,  $J = 7.9$ , 6H).

To a vial containing **SI-1** (17.9 mg, 0.038 mmol, 1.0 equiv) was added the Petasis reagent (1.0 M in PhMe, 444  $\mu\text{L}$ , 0.444 mmol, 11.8 equiv) in the absence of light. The reaction vessel was then sealed and heated to 60 °C. After 4.5 h the reaction was cooled to room temperature and filtered by passage over a plug of silica gel (3:1 hexanes:EtOAc eluent, 15 mL). The filtrate was evaporated under reduced pressure and the resulting residue was purified by preparative thin layer chromatography (3:1 hexanes:EtOAc) to afford silyl ether **20** (15.6 mg, 88% yield) as an amorphous solid. Silyl Ether **20**:  $R_f$  0.57 (3:1 hexanes:EtOAc);  $^1\text{H}$  NMR (500 MHz,  $\text{CDCl}_3$ ):  $\delta$  7.14 (dd,  $J = 7.7, 7.7$ , 1H), 6.65 (d,  $J = 7.6$ , 1H), 6.62 (d,  $J = 7.6$ , 1H), 5.65 (dd,  $J = 17.2, 10.9$ , 1H), 5.15 (dd,  $J = 12.7, 4.5$ ,

1H), 4.85 (dd,  $J = 17.3, 0.9$ , 1H), 4.80 (d,  $J = 11.1$ , 1H), 4.04 (br. s, 1H), 3.46 (s, 1H), 3.17 (s, 3H), 3.12–3.08 (m, 1H), 2.43–2.34 (m, 1H), 2.19–2.03 (m, 2H), 1.51 (s, 3H), 1.50 (s, 3H), 0.96 (t,  $J = 7.9$ , 9H), 0.85 (s, 3H), 0.58 (q,  $J = 7.8$ , 6H);  $^{13}\text{C}$  NMR (125 MHz,  $\text{CDCl}_3$ ):  $\delta$  176.2, 144.5, 138.6, 138.3, 128.0, 125.5, 124.4, 115.0, 106.3, 70.0, 65.3, 60.7, 54.8, 50.6, 44.4, 39.7, 31.5, 29.7, 26.3, 25.9, 22.6, 7.1, 4.9; IR (film): 2956, 2912, 1708, 1610, 1597  $\text{cm}^{-1}$ ; HRMS-ESI ( $m/z$ ) [ $\text{M} + \text{H}$ ] $^+$  calcd for  $\text{C}_{27}\text{H}_{41}\text{ClNO}_2\text{Si}$ , 474.25951; found 474.25746;  $[\alpha]_{\text{D}}^{21.0} -1.40^\circ$  ( $c = 1.000$ ,  $\text{CHCl}_3$ ).

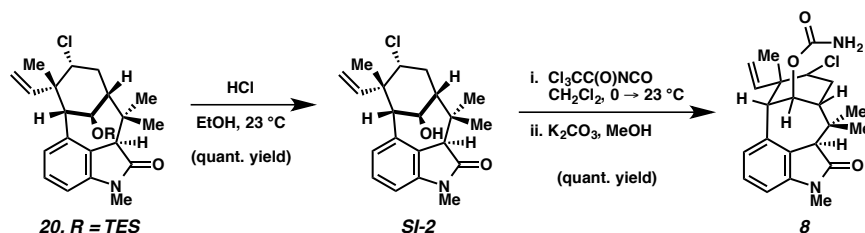

**Carbamate 8.** To a flask containing silyl ether **20** (5.4 mg, 0.011 mmol, 1.0 equiv), was added absolute ethanol (542  $\mu\text{L}$ ) and concentrated aqueous HCl (542  $\mu\text{L}$ ). The solution was then allowed to stir at room temperature. After 20 min, the reaction mixture was transferred to a separatory funnel with EtOAc (6 mL). To the funnel was slowly added a saturated aqueous solution of  $\text{NaHCO}_3$  (5 mL) until gas evolution was no longer observed. The resulting biphasic mixture was extracted with EtOAc (3 x 3 mL) and the organic layers were combined, dried over  $\text{Na}_2\text{SO}_4$ , and evaporated under reduced pressure. The resulting residue was purified by preparative thin layer chromatography (1:1 hexanes:EtOAc) to afford **SI-2** (4.1 mg, quant. yield) as an amorphous solid. **SI-2**:  $R_f$  0.18 (3:1 hexanes:EtOAc);  $^1\text{H}$  NMR (500 MHz,  $\text{CDCl}_3$ ):  $\delta$  7.14 (dd,  $J = 7.7, 7.7$ , 1H), 6.67–6.63 (m, 2H), 5.64 (dd,  $J = 17.3, 11.0$ , 1H), 5.14 (dd,  $J = 12.8, 4.5$ , 1H), 4.87 (dd,  $J = 17.2, 0.8$ , 1H), 4.81 (d,  $J = 11.1$ , 1H), 4.15 (s, 1H), 3.47 (s, 1H), 3.17 (s, 3H), 2.42 (ddd,  $J = 14.7, 10.8, 5.3$ , 1H), 2.21–2.07 (m, 2H), 1.54 (s, 3H), 1.52 (s, 3H), 0.85 (s, 3H).

To a solution of **SI-2** (4.1 mg, 0.011 mmol, 1.0 equiv) in  $\text{CH}_2\text{Cl}_2$  (228  $\mu\text{L}$ ) at 0  $^\circ\text{C}$  was added trichloroacetyl isocyanate (1.7  $\mu\text{L}$ , 0.0142 mmol, 1.25 equiv) in a dropwise manner. The resulting mixture was allowed to stir at 0  $^\circ\text{C}$  for 5 min, and then at room temperature for 30 min. The solvent was evaporated under reduced pressure. To the resulting residue was added MeOH (228  $\mu\text{L}$ ), followed by  $\text{K}_2\text{CO}_3$  (8.6 mg, 0.0626 mmol, 5.5 equiv) in one portion. The vial was flushed with  $\text{N}_2$  and left to stir at room temperature. After 1 h, the reaction was quenched with a saturated aqueous solution of  $\text{NH}_4\text{Cl}$  (1 mL), and the resulting biphasic mixture was transferred to a separatory funnel with EtOAc (6 mL) and  $\text{H}_2\text{O}$  (4 mL). After extracting with EtOAc (3 x 3 mL), the organic layers were combined, dried over  $\text{Na}_2\text{SO}_4$ , and evaporated under reduced pressure. The resulting residue was purified by preparative thin layer chromatography (1:1 hexanes:EtOAc) to afford carbamate **8** (4.6 mg, quant. yield) as an amorphous solid. Carbamate **8**:  $R_f$  0.44 (1:1 hexanes:EtOAc);  $^1\text{H}$  NMR (500 MHz,  $\text{CDCl}_3$ ):  $\delta$  7.15 (dd,  $J = 7.8, 7.8$ , 1H), 6.70–6.63 (m, 2H), 5.62 (dd,  $J = 17.2, 10.8$ , 1H), 5.14–5.09 (m, 1H), 4.88 (dd,  $J = 17.2, 0.7$ , 1H), 4.84 (d,  $J = 11.0$ , 1H), 4.77 (dd,  $J = 12.7, 4.7$ , 1H), 4.66 (s, 2H), 3.47 (s, 1H), 3.28–3.25 (m, 1H), 3.18 (s, 3H), 2.44–2.34 (m, 1H), 2.23–2.13 (m, 2H),



1.53, (s, 3H), 1.50 (s, 3H), 0.93 (s, 3H);  $^{13}\text{C}$  NMR (125 MHz,  $\text{CDCl}_3$ ):  $\delta$  175.9, 155.3, 144.5, 137.9, 137.0, 128.2, 125.7, 124.4, 115.6, 106.7, 73.2, 64.6, 57.0, 51.1, 50.7, 44.1, 39.7, 31.0, 29.4, 26.4, 25.7, 22.3; IR (film): 3489, 3348, 2966, 1694, 1610  $\text{cm}^{-1}$ ; HRMS-ESI ( $m/z$ )  $[\text{M} + \text{H}]^+$  calcd for  $\text{C}_{22}\text{H}_{28}\text{ClN}_2\text{O}_3$ , 403.17885; found 403.17618;  $[\alpha]^{23.4}_{\text{D}} - 89.33^\circ$  ( $c = 1.000$ ,  $\text{CHCl}_3$ ).

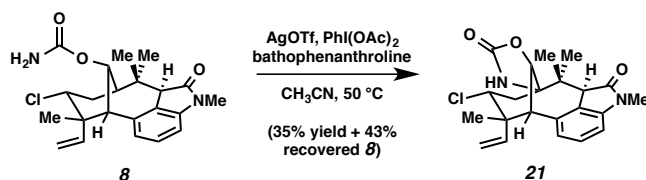

**Oxazolidinone 21.** A 1-dram vial containing  $\text{CH}_3\text{CN}$ , a second 1-dram vial charged with bathophenanthroline (3.8 mg, 0.011 mmol, 1.0 equiv), and a third 1-dram vial containing carbamate **8** (4.6 mg, 0.011 mmol, 1.0 equiv) and  $\text{PhI}(\text{OAc})_2$  (14.7 mg, 0.046 mmol, 4.0 equiv) were transferred into the glovebox. AgOTf (2.9 mg, 0.011 mmol, 1.0 equiv) and  $\text{CH}_3\text{CN}$  (200  $\mu\text{L}$ ) were added to the vial containing the bathophenanthroline, and the resulting suspension was allowed to stir at room temperature for 20 min. Next,  $\text{CH}_3\text{CN}$  (126  $\mu\text{L}$ ) was added to the vial containing the carbamate, and the AgOTf/bathophenanthroline suspension was also added to this vial. The vial was then sealed, removed from the glovebox, and the resulting mixture was heated to 50 °C. After 20.5 h, the reaction was cooled to room temperature and filtered by passage over a plug of celite (EtOAc eluent, 10 mL). The filtrate was evaporated under reduced pressure, and the resulting residue was purified by preparative thin layer chromatography (1:2:2 PhH: $\text{CH}_2\text{Cl}_2$ :Et<sub>2</sub>O) to afford oxazolidinone **21** (1.6 mg, 35% yield) as an amorphous solid and recovered carbamate **8** (2.0 mg, 43% yield). Oxazolidinone **21**:  $R_f$  0.43 (1:2:2 PhH:Et<sub>2</sub>O: $\text{CH}_2\text{Cl}_2$ );  $^1\text{H}$  NMR (500 MHz,  $\text{CDCl}_3$ ):  $\delta$  7.21 (dd,  $J = 7.8, 7.8$ , 1H), 6.75–6.68 (m, 2H), 5.77 (s, 1H), 5.39 (dd,  $J = 17.1, 10.8$ , 1H), 5.02 (d,  $J = 17.2$ , 1H), 4.94 (d,  $J = 10.8$ , 1H), 4.71 (d,  $J = 2.0$ , 1H), 4.62 (dd,  $J = 13.7, 3.6$ , 1H), 3.59 (s, 1H), 3.46 (s, 1H), 3.20 (s, 3H), 2.67 (app t,  $J = 14.3$ , 1H), 2.19 (dd,  $J = 14.7, 3.6$ , 1H), 1.61 (s, 3H), 1.58 (s, 3H), 0.95 (s, 3H);  $^{13}\text{C}$  NMR (125 MHz,  $\text{CDCl}_3$ ):  $\delta$  174.2, 158.0, 144.7, 137.9, 136.4, 128.7, 126.7, 123.0, 116.0, 107.3, 78.7, 67.5, 61.7, 53.6, 52.7, 44.4, 41.3, 40.2, 28.3, 26.5, 21.1, 17.8; IR (film): 3268, 2975, 1754, 1702, 1610  $\text{cm}^{-1}$ ; HRMS-ESI ( $m/z$ )  $[\text{M} + \text{H}]^+$  calcd for  $\text{C}_{22}\text{H}_{26}\text{ClN}_2\text{O}_3$ , 401.16320; found 401.16188;  $[\alpha]^{20.5}_{\text{D}} + 68.60^\circ$  ( $c = 1.000$ ,  $\text{CHCl}_3$ ).

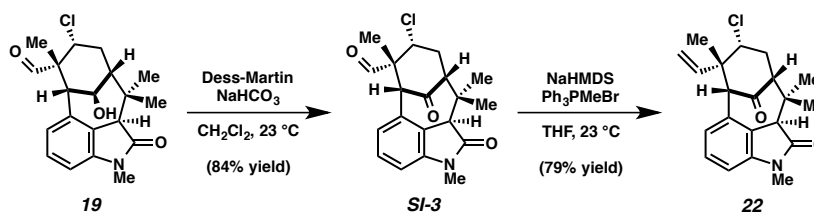

**Ketone 22.** To a flask containing alkyl chloride **19** (15.1 mg, 0.042 mmol, 1.0 equiv) was added solid  $\text{NaHCO}_3$  (17.5 mg, 0.054 mmol, 5.0 equiv) in one portion. The reaction vessel was flushed with  $\text{N}_2$ , and then  $\text{CH}_2\text{Cl}_2$  (834  $\mu\text{L}$ ) was added. To the resulting suspension was added the Dess–Martin periodinane reagent (23.0 mg, 0.21 mmol, 1.3 equiv) in one portion. The flask was flushed with  $\text{N}_2$ , and the reaction mixture was allowed to stir at room temperature. After 1 h, the reaction mixture was diluted with a 1:1 mixture of saturated aqueous  $\text{NaHCO}_3$  and saturated aqueous  $\text{Na}_2\text{S}_2\text{O}_3$  (1.0 mL). The resulting biphasic mixture was vigorously stirred until both layers appeared clear. The mixture was then transferred to a separatory funnel with EtOAc (6 mL) and  $\text{H}_2\text{O}$  (4 mL), and then extracted with EtOAc (3 x 3 mL). The organic layers were combined, dried over  $\text{Na}_2\text{SO}_4$ , and evaporated under reduced pressure. The resulting residue was purified by preparative thin layer chromatography (1:1 hexanes:EtOAc) to afford **SI-3** (12.6 mg, 84% yield) as a white foam. **SI-3:**  $R_f$  0.88 (1:3 hexanes:EtOAc);  $^1\text{H}$  NMR (500 MHz,  $\text{C}_6\text{D}_6$ ):  $\delta$  9.06 (d,  $J = 1.2$ , 1H), 6.76 (ddd,  $J = 7.8, 7.8, 0.8$ , 1H), 6.33 (d,  $J = 7.6$ , 1H), 6.00 (d,  $J = 7.5$ , 1H), 3.41 (d,  $J = 2.2$ , 1H), 3.40 (s, 1H), 3.35 (ddd,  $J = 13.5, 4.5, 0.9$ , 1H), 2.84 (m, 1H), 2.52 (s, 3H), 2.28–2.21 (m, 1H), 1.93 (ddd,  $J = 14.6, 10.7, 4.6$ , 1H), 1.40 (s, 3H), 1.13 (s, 3H), 0.70 (s, 3H).

To a vial containing methyl triphenylphosphonium bromide (373 mg, 1.04 mmol, 15.0 equiv) was added THF (1.7 mL). The reaction vessel was cooled to  $0^\circ\text{C}$  and NaHMDS (1.0 M in THF, 836  $\mu\text{L}$ , 0.84 mmol, 12.0 equiv) was added in a dropwise manner. The vial was allowed to warm to room temperature and left to stir for 20 min. A solution of **SI-3** (25.0 mg, 0.070 mmol, 1.0 equiv) in THF (2.4 mL) was added dropwise in three portions and the reaction was left to stir at room temperature. After 30 min, the reaction was quenched by the addition of a saturated aqueous solution of  $\text{NH}_4\text{Cl}$  (5 mL). The resulting biphasic mixture was transferred to a separatory funnel with EtOAc (15 mL) and  $\text{H}_2\text{O}$  (10 mL). After extracting with EtOAc (3 x 15 mL), the organic layers were combined, dried over  $\text{MgSO}_4$ , and evaporated under reduced pressure. The resulting crude mixture was filtered by passage over a plug of silica gel (1:1 hexanes:EtOAc, 40 mL). The filtrate was evaporated under reduced pressure and the resulting residue was purified by flash chromatography (7:1 hexanes:EtOAc) to afford ketone **22** (77.4 mg, 79% yield) as a white solid. Ketone **22:** mp:  $110.4^\circ\text{C}$ ;  $R_f$  0.67 (1:1 hexanes:EtOAc);  $^1\text{H}$  NMR (500 MHz,  $\text{CDCl}_3$ ):  $\delta$  7.21 (dd,  $J = 7.7, 7.7$ , 1H), 6.70 (d,  $J = 7.6$ , 1H), 6.68 (d,  $J = 7.7$ , 1H), 5.82 (dd,  $J = 17.4, 11.1$ , 1H), 5.00–4.95 (m, 2H), 3.99 (dd,  $J = 12.1, 3.6$ , 1H), 3.72 (s, 1H), 3.61 (d,  $J = 2.0$ , 1H), 3.19 (s, 3H), 2.75–2.64 (m, 2H), 2.54–2.47 (m, 1H), 1.55 (s, 3H), 1.48 (s, 3H), 0.71 (s, 3H);  $^{13}\text{C}$  NMR (125 MHz,  $\text{CDCl}_3$ ):  $\delta$  207.6, 175.3, 144.6, 136.2, 132.1, 129.0, 125.2, 124.4, 117.9, 107.3, 68.9, 64.5, 62.5, 50.9, 48.6, 41.8, 32.6, 29.7, 26.5, 25.0, 22.2; IR (film): 1702, 1607, 1591,  $1465\text{ cm}^{-1}$ ; HRMS-ESI ( $m/z$ ) [ $\text{M} + \text{H}$ ] $^+$  calcd for  $\text{C}_{21}\text{H}_{25}\text{ClINO}_2$ , 358.15738; found 358.15590;  $[\alpha]_D^{23.4} +12.0^\circ$  ( $c = 1.000$ ,  $\text{CHCl}_3$ ).

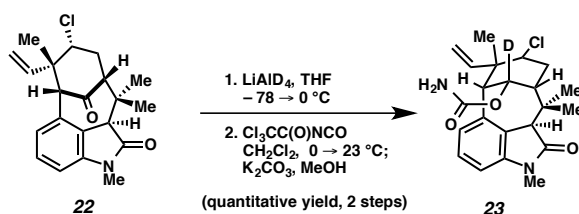

**Carbamate 23.** To a solution of ketone **22** (87 mg, 0.244 mmol, 1.0 equiv) in THF (24.4 mL) at  $-78\text{ }^\circ\text{C}$  was added a solution of  $\text{LiAlD}_4$  (1.0 M in THF, 731  $\mu\text{L}$ , 0.731 mmol, 3.0 equiv) in a dropwise manner. After stirring at  $-78\text{ }^\circ\text{C}$  for 10 min, the solution was then allowed to warm to  $0\text{ }^\circ\text{C}$ . After 12 min, the reaction was quenched at  $0\text{ }^\circ\text{C}$  by the slow addition of a saturated solution of aqueous Rochelle's salt (10 mL), and then allowed to warm to  $23\text{ }^\circ\text{C}$ . The resulting biphasic mixture was stirred at room temperature for 1 h, transferred to a separatory funnel with EtOAc (10 mL) and  $\text{H}_2\text{O}$  (10 mL), and extracted with EtOAc (3 x 10 mL). The organic layers were combined, dried over  $\text{MgSO}_4$ , and evaporated under reduced pressure. The resulting residue was used in the subsequent step without further purification.

To a flask containing the crude residue from the previous step was added  $\text{CH}_2\text{Cl}_2$  (4.9 mL). The reaction vessel was cooled to  $0\text{ }^\circ\text{C}$  and trichloroacetyl isocyanate (36.3  $\mu\text{L}$ , 0.305 mmol, 1.25 equiv) was added in a dropwise manner. The resulting mixture was allowed to stir at  $0\text{ }^\circ\text{C}$  for 5 min, and then at room temperature for 20 min. The solvent was evaporated under reduced pressure. To the resulting residue was added MeOH (4.9 mL) and solid  $\text{K}_2\text{CO}_3$  (185 mg, 1.34 mmol, 5.5 equiv) in one portion. The reaction was flushed with  $\text{N}_2$  and left to stir at room temperature for 1 h. The reaction was quenched by the addition of a solution of saturated aqueous  $\text{NH}_4\text{Cl}$  (5.0 mL), and the resulting biphasic mixture was transferred to a separatory funnel with EtOAc (10 mL) and  $\text{H}_2\text{O}$  (10 mL). After extracting with EtOAc (3 x 10 mL), the organic layers were combined, dried over  $\text{MgSO}_4$ , and evaporated under reduced pressure. The resulting residue was purified by flash chromatography (2:1  $\rightarrow$  1:1 hexanes:EtOAc) to afford carbamate **23** (98 mg, quantitative yield, over two steps) as a white solid. Carbamate **23**: mp:  $102.8\text{ }^\circ\text{C}$ ;  $R_f$  0.56 (2:1 EtOAc:hexanes);  $^1\text{H}$  NMR (500 MHz,  $\text{CDCl}_3$ ):  $\delta$  7.14 (dd,  $J = 7.7, 7.7$ , 1H), 6.68 (d,  $J = 7.6$ , 1H), 6.61 (d,  $J = 7.7$ , 1H), 5.72 (dd,  $J = 17.1, 10.9$ , 1H), 4.87–4.84 (m, 2H), 4.47–4.4 (m, 3H), 3.69 (s, 1H), 3.19 (s, 3H), 3.14 (s, 1H), 2.54–2.46 (m, 2H), 2.39–2.29 (m, 1H), 1.51 (s, 3H), 1.45 (s, 3H), 0.90 (s, 3H);  $^2\text{H}$  NMR (77 MHz,  $\text{CDCl}_3$ )  $\delta$  5.43 (br. s, 1D);  $^{13}\text{C}$  NMR (125 MHz,  $\text{CDCl}_3$ ):  $\delta$  176.3, 155.8, 144.3, 137.9, 137.5, 127.8, 126.5, 125.3, 116.1, 106.6, 64.1, 56.1, 51.5, 46.6, 46.3, 39.1, 33.0, 29.0, 26.7, 26.4, 24.0; IR (film): 1724, 1701, 1607, 1467, 1376,  $\text{cm}^{-1}$ ; HRMS-ESI ( $m/z$ )  $[\text{M} + \text{H}]^+$  calcd for  $\text{C}_{22}\text{H}_{27}\text{DClN}_2\text{O}_3$ , 404.18512; found 404.18342;  $[\alpha]^{24.3}_{\text{D}} -3.20^\circ$  ( $c = 1.000$ ,  $\text{CHCl}_3$ ).

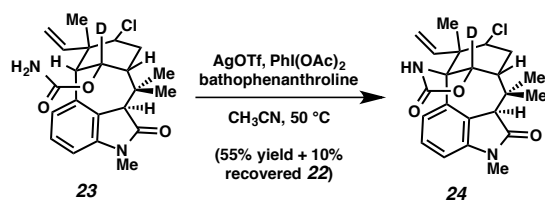

**Oxazolidinone 24.** A 1-dram vial containing CH<sub>3</sub>CN, a second 1-dram vial charged with bathophenanthroline (13 mg, 0.039 mmol, 1.0 equiv), and a third 1-dram vial containing carbamate **23** (15.8 mg, 0.039 mmol, 1.0 equiv) and PhI(OAc)<sub>2</sub> (50 mg, 0.157 mmol, 4.0 equiv) were transferred into the glovebox. AgOTf (10 mg, 0.039 mmol, 1.0 equiv) and CH<sub>3</sub>CN (550  $\mu$ L) were added to the vial containing the bathophenanthroline, and the resulting suspension was allowed to stir at room temperature for 20 min. Next, CH<sub>3</sub>CN (550  $\mu$ L) was added to the vial containing the carbamate, and the AgOTf/bathophenanthroline suspension was also added to this vial. The vial was then sealed, removed from the glovebox, and the resulting mixture was heated to 50 °C. After 24 h, the reaction was cooled to room temperature and filtered by passage over a plug of silica gel (EtOAc eluent, 10 mL). The filtrate was evaporated under reduced pressure, and the resulting residue was purified by preparative thin layer chromatography (2:1:1 benzene:Et<sub>2</sub>O:CH<sub>2</sub>Cl<sub>2</sub>) to afford oxazolidinone **24** (8.7 mg, 55% yield) as a white solid and recovered ketone **22** (1 mg, 10% yield). Oxazolidinone **24**: mp: 183.2 °C; R<sub>f</sub> 0.32 (1:2:2 benzene:Et<sub>2</sub>O:CH<sub>2</sub>Cl<sub>2</sub>); <sup>1</sup>H NMR (500 MHz, CDCl<sub>3</sub>):  $\delta$  7.76 (s, 1H), 7.09 (dd, *J* = 7.9, 7.9, 1H), 6.69 (d, *J* = 7.8, 1H), 6.66 (d, *J* = 8.2, 1H), 5.54 (dd, *J* = 17.3, 10.7, 1H), 5.06 (d, *J* = 17.3, 1H), 5.00 (d, *J* = 10.9, 1H), 4.38–4.32 (m, 1H), 3.97 (s, 1H), 3.21 (s, 3H), 2.71–2.60 (m, 2H), 2.55–2.45 (m, 1H), 1.57 (s, 3H), 1.52 (s, 3H), 1.11 (s, 3H); <sup>2</sup>H NMR (77 MHz, CDCl<sub>3</sub>)  $\delta$  4.91 (br. s, 1D); <sup>13</sup>C NMR (125 MHz, CDCl<sub>3</sub>):  $\delta$  175.1, 159.5, 143.6, 138.7, 137.5, 128.2, 125.3, 124.1, 115.9, 107.0, 70.3, 63.1, 53.3, 47.9, 45.5, 38.2, 32.3, 27.1, 26.4, 23.3, 21.0; IR (film): 1748, 1703, 1683, 1610, 1591 cm<sup>-1</sup>; HRMS-ESI (*m/z*) [M + H]<sup>+</sup> calcd for C<sub>22</sub>H<sub>25</sub>DCIN<sub>2</sub>O<sub>3</sub>, 402.16947; found 402.16849; [ $\alpha$ ]<sub>D</sub><sup>23.1</sup> +8.20° (*c* = 1.000, CHCl<sub>3</sub>).

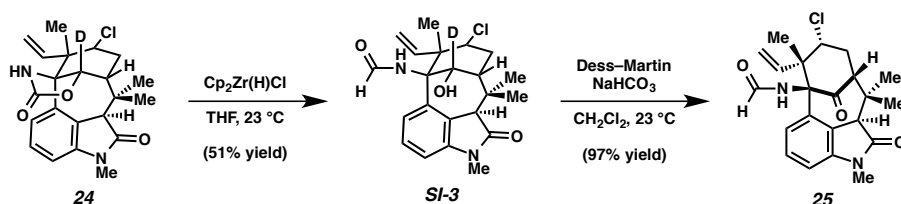

**Formamide 25.** Two 1-dram vials were charged with **24** (7.0 mg, 0.017 mmol, 1.0 equiv each) and taken into the glovebox. Each reaction vessel was charged with Schwartz' reagent (5.9 mg, 0.023 mmol, 1.3 equiv each) and THF (1.74 mL each), the latter of which had previously been taken through six freeze-pump-thaw cycles. The reaction vessels were sealed and left to stir at room temperature. After 14 h, the reaction vials were removed from the glovebox and quenched with a saturated aqueous solution of NH<sub>4</sub>Cl (1 mL for each vial). The resulting biphasic mixtures were transferred to a test tube with EtOAc (2 mL) and brine (1 mL). After extracting with EtOAc (3 x 2 mL). The

organic layers were combined, dried over  $\text{MgSO}_4$ , and evaporated under reduced pressure. The resulting residue was purified by preparative thin layer chromatography (1:1 hexanes:acetone) to afford **SI-3**<sup>5</sup> (7.2 mg, 51% yield) as a white solid and recovered oxazolidinone **24** (3.1 mg, 22% yield). **SI-3**:  $R_f$  0.09 (1:1 hexanes:EtOAc);  $^1\text{H}$  NMR (500 MHz,  $\text{CDCl}_3$ ):<sup>6</sup> 8.3–8.25 (m, 1.36H), 7.95 (s, 0.47H), 7.31–7.27 (m, 1.25H), 6.96 (d,  $J$  = 8.2, 0.41H), 6.87 (d,  $J$  = 8.1, 1H), 6.78–6.73 (m,  $J$  = 8.3, 2.0H), 6.22 (s, 1H), 6.10 (d,  $J$  = 11.2, 0.41H), 5.92 (dd,  $J$  = 17.8, 11.4, 1H), 5.88–5.80 (m, 0.87H), 5.05–4.97 (m, 0.8H), 4.94–4.85 (m, 3H), 4.79 (dd,  $J$  = 9.9, 5.5, 1H), 4.48 (dd,  $J$  = 9.2, 5.2, 0.5H), 4.33 (d,  $J$  = 8.2, 5.7, 0.38H), 4.20 (s, 0.36H), 4.10 (s, 0.38H), 4.06 (s, 1H), 3.23–3.19 (m, 5.7H), 2.73–2.49 (m, 4.5H), 2.44–2.36 (m, 1.5H), 1.57 (s, 3H), 1.56 (s, 3.5H), 1.52 (s, 4.4H), 1.50 (s, 1.71H), 1.23 (s, 1.34H), 1.18 (s, 3H), 0.95 (s, 1.4H).

A 1-dram vial was charged with **SI-3** (5.2 mg, 0.013 mmol, 1.0 equiv) and solid  $\text{NaHCO}_3$  (5.4 mg, 0.065 mmol, 5.0 equiv) in one portion. The reaction vessel was flushed with  $\text{N}_2$ , and then  $\text{CH}_2\text{Cl}_2$  (260  $\mu\text{L}$ ) was added. To the resulting suspension was added the Dess–Martin periodinane reagent (7.1 mg, 0.017 mmol, 1.3 equiv) in one portion. The flask was flushed with  $\text{N}_2$ , and the reaction mixture was allowed to stir at room temperature. After 1 h, the reaction mixture was diluted with a 1:1 mixture of saturated aqueous  $\text{NaHCO}_3$  and saturated aqueous  $\text{Na}_2\text{S}_2\text{O}_3$  (1.0 mL). The resulting biphasic mixture was vigorously stirred until both layers appeared clear. The mixture was then transferred to a test tube with EtOAc (2 mL) and brine (2 mL), and then extracted with EtOAc (3 x 2 mL). The organic layers were combined, dried over  $\text{MgSO}_4$ , and evaporated under reduced pressure. The resulting residue was purified by flash chromatography (5:1  $\rightarrow$  3:1 hexanes:acetone) to afford formamide **25** (5.0 mg, 97% yield) as a white solid. formamide **25**: mp: 213.3  $^\circ\text{C}$ ;  $R_f$  0.41 (3:1 EtOAc:hexanes);  $^1\text{H}$  NMR (500 MHz,  $\text{CDCl}_3$  at  $-44\text{ }^\circ\text{C}$ ):<sup>7</sup>  $\delta$  8.21 (d,  $J$  = 1.1, 0.25H), 7.53 (d,  $J$  = 12.0, 1H), 7.32 (dd,  $J$  = 8.1, 7.9, 1.25H), 7.02 (d,  $J$  = 8.1, 1H), 7.00 (d,  $J$  = 8.3, 0.25H), 6.82 (d,  $J$  = 7.5, 1H), 6.79 (d,  $J$  = 7.5, 0.25H), 6.38 (dd,  $J$  = 17.3, 11.0, 0.25H), 6.28 (dd,  $J$  = 17.3, 10.7, 1H), 5.78 (s, 0.25H), 5.73 (d,  $J$  = 11.5, 1H), 5.51 (d,  $J$  = 11.2, 0.25H), 5.48 (d,  $J$  = 11.0, 1H), 5.42–5.30 (m, 1.25H), 4.40 (s, 1H), 4.32 (s, 0.25H), 4.24 (d,  $J$  = 7.4, 1H), 4.19 (d,  $J$  = 7.1, 0.25H), 3.22 (s, 3H), 3.21 (s, 0.75H), 3.20–3.14 (m, 1H), 3.08–2.90 (m, 2.6H), 2.81 (d,  $J$  = 17.4, 1H), 2.75 (d,  $J$  = 16.4, 0.25H), 1.68 (s, 3H), 1.63 (s, 0.75H), 1.28 (s, 3.75H), 0.98 (s, 0.75H), 0.87 (s, 3H);  $^{13}\text{C}$  NMR (125 MHz,  $\text{CDCl}_3$ ):  $\delta$  202.8, 174.3, 167.3, 144.0, 137.2, 133.7, 128.4, 126.7, 124.8, 118.2, 108.1, 71.5, 62.2, 60.2, 55.0, 49.8, 38.2, 31.8, 26.3, 26.1, 22.9, 20.9; IR (film): 2967, 2932, 1696, 1609, 1585  $\text{cm}^{-1}$ ; HRMS-ESI ( $m/z$ ) [ $\text{M} + \text{H}$ ]<sup>+</sup> calcd for  $\text{C}_{22}\text{H}_{26}\text{ClN}_2\text{O}_3$ , 401.16320; found 401.16143;  $[\alpha]_D^{22.4} +9.60^\circ$  ( $c$  = 1.000,  $\text{CHCl}_3$ ).

<sup>5</sup> In our studies, products containing a formamide often assume a mixture of rotamers by  $^1\text{H}$  NMR.

<sup>6</sup> **SI-3** was obtained as a 2.8:1.3:1 mixture of rotamers. These data represent empirically observed chemical shifts and coupling constants from the  $^1\text{H}$  NMR spectrum.

<sup>7</sup> Formamide **25** was obtained as a 4:1 mixture of rotamers. These data represent empirically observed chemical shifts and coupling constants from the  $^1\text{H}$  NMR spectrum.

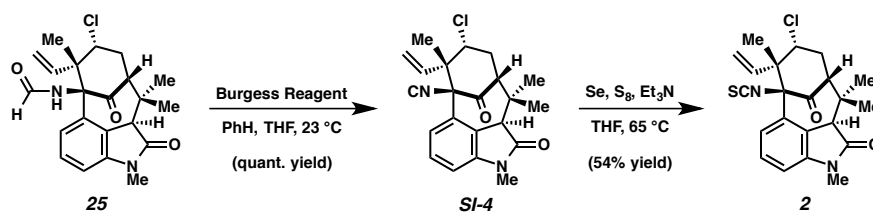

**(–)-*N*-Methylwelwitindolinone B Isothiocyanate (2).** To a solution of formamide **25** (3.3 mg, 0.008 mmol, 1.0 equiv) in 1:1 THF/PhH (660  $\mu$ L) was added Burgess reagent (2.0 mg, 0.008 mmol, 1.0 equiv). The reaction vessel was purged with N<sub>2</sub>, and then sealed and left to stir at room temperature. After stirring for 1 h, an additional portion of Burgess reagent (0.5 mg, 0.002 mmol, 0.25 equiv) was added. After stirring at room temperature for 30 min, a final portion of Burgess reagent (0.5 mg, 0.002 mmol, 0.25 equiv) was added and the resulting solution was stirred at room temperature. After 25 min, the reaction was filtered by passage over a plug of silica gel (EtOAc eluent, 6 mL). The filtrate was evaporated under reduced pressure and the resulting residue was purified by flash chromatography (5:1:1 hexanes:Et<sub>2</sub>O:CH<sub>2</sub>Cl<sub>2</sub>) to afford **SI-4** (3.2 mg, quant. yield) as a white solid. **SI-4**: R<sub>f</sub> 0.55 (1:1:1 hexanes:Et<sub>2</sub>O:CH<sub>2</sub>Cl<sub>2</sub>); <sup>1</sup>H NMR (500 MHz, C<sub>6</sub>D<sub>6</sub>):  $\delta$  7.41 (d, *J* = 8.3, 1H), 6.86 (dd, *J* = 8.0, 8.0, 1H), 6.04 (d, *J* = 7.7, 1H), 5.82 (dd, *J* = 17.2, 11.0, 1H), 4.95–4.81 (m, 2H), 3.83 (s, 1H), 3.43 (dd, *J* = 6.4, 6.2, 1H), 2.55 (s, 3H), 2.36 (dd, *J* = 9.9, 3.6, 1H), 2.19–2.11 (m, 1H), 1.91–1.81 (m, 1H), 1.46 (s 3H), 1.26 (s, 3H), 0.75 (s, 3H).

Two 1-dram vials containing **SI-4** (2.9 mg, 0.008 mmol, 1.0 equiv each) were charged with powdered Se (1.8 mg, 0.023 mmol, 3.0 equiv each) and S<sub>8</sub> (1.9 mg, 0.590 mmol, 76.4 equiv each). The reaction vessels were purged with N<sub>2</sub> and to each vessel was added THF (584  $\mu$ L, previously sparged with N<sub>2</sub> for 20 min) and NEt<sub>3</sub> (81  $\mu$ L, 0.590 mmol, 26.4 equiv). Each reaction vessel was then sealed and heated to 65 °C. After 17 h, the reaction vials were cooled to room temperature. Their contents were combined and filtered by passage over a plug of silica gel (EtOAc eluent, 6 mL). The filtrate was evaporated under reduced pressure and the resulting residue was purified by preparative thin layer chromatography (1:1:1 hexanes:Et<sub>2</sub>O:CH<sub>2</sub>Cl<sub>2</sub>) to afford (–)-**2** (3.4 mg, 54% yield) as a white solid. (–)-*N*-Methylwelwitindolinone B isothiocyanate (**2**): mp: 186.4 °C; R<sub>f</sub> 0.61 (1:1 hexanes:EtOAc); <sup>1</sup>H NMR (500 MHz, CDCl<sub>3</sub>):  $\delta$  7.34 (ddd, *J* = 8.3, 0.8, 1H), 7.25 (dd, *J* = 8.3, 0.9, 1H), 6.80 (d, *J* = 7.7, 1H), 5.99 (dd, *J* = 17.5, 11.1, 1H), 5.22–5.15 (m, 2H), 4.17 (app t, *J* = 6.3, 1H), 4.13 (s, 1H), 3.20 (s, 3H), 2.95 (app t, *J* = 7.2, 1H), 2.78 (app t, *J* = 6.5, 1H), 1.62 (s 3H), 1.48 (s, 3H), 0.83 (s, 3H); <sup>13</sup>C NMR (125 MHz, CDCl<sub>3</sub>):  $\delta$  198.6, 174.3, 144.1, 139.6, 136.4, 131.2, 128.8, 123.9, 122.6, 118.1, 108.3, 83.5, 62.5, 60.2, 53.3, 52.9, 39.8, 31.5, 26.4, 25.4, 24.1, 22.5; IR (film): 2969, 2933, 2049, 1710, 1607, 1587, 1460 cm<sup>–1</sup>; HRMS-ESI (*m/z*) [M + H]<sup>+</sup> calcd for C<sub>22</sub>H<sub>24</sub>ClN<sub>2</sub>O<sub>2</sub>S, 415.12470; found 415.12245; [ $\alpha$ ]<sub>D</sub><sup>20.9</sup> –133.71° (*c* = 0.071, CH<sub>2</sub>Cl<sub>2</sub>).<sup>8</sup>

<sup>8</sup> Reported values for specific rotations can be highly variable, for a pertinent discussion, see: Gawley, R. E. *J. Org. Chem.* **2006**, 71, 2411–2416.

**$^1\text{H}$  and  $^2\text{H}$  NMR Spectra:**

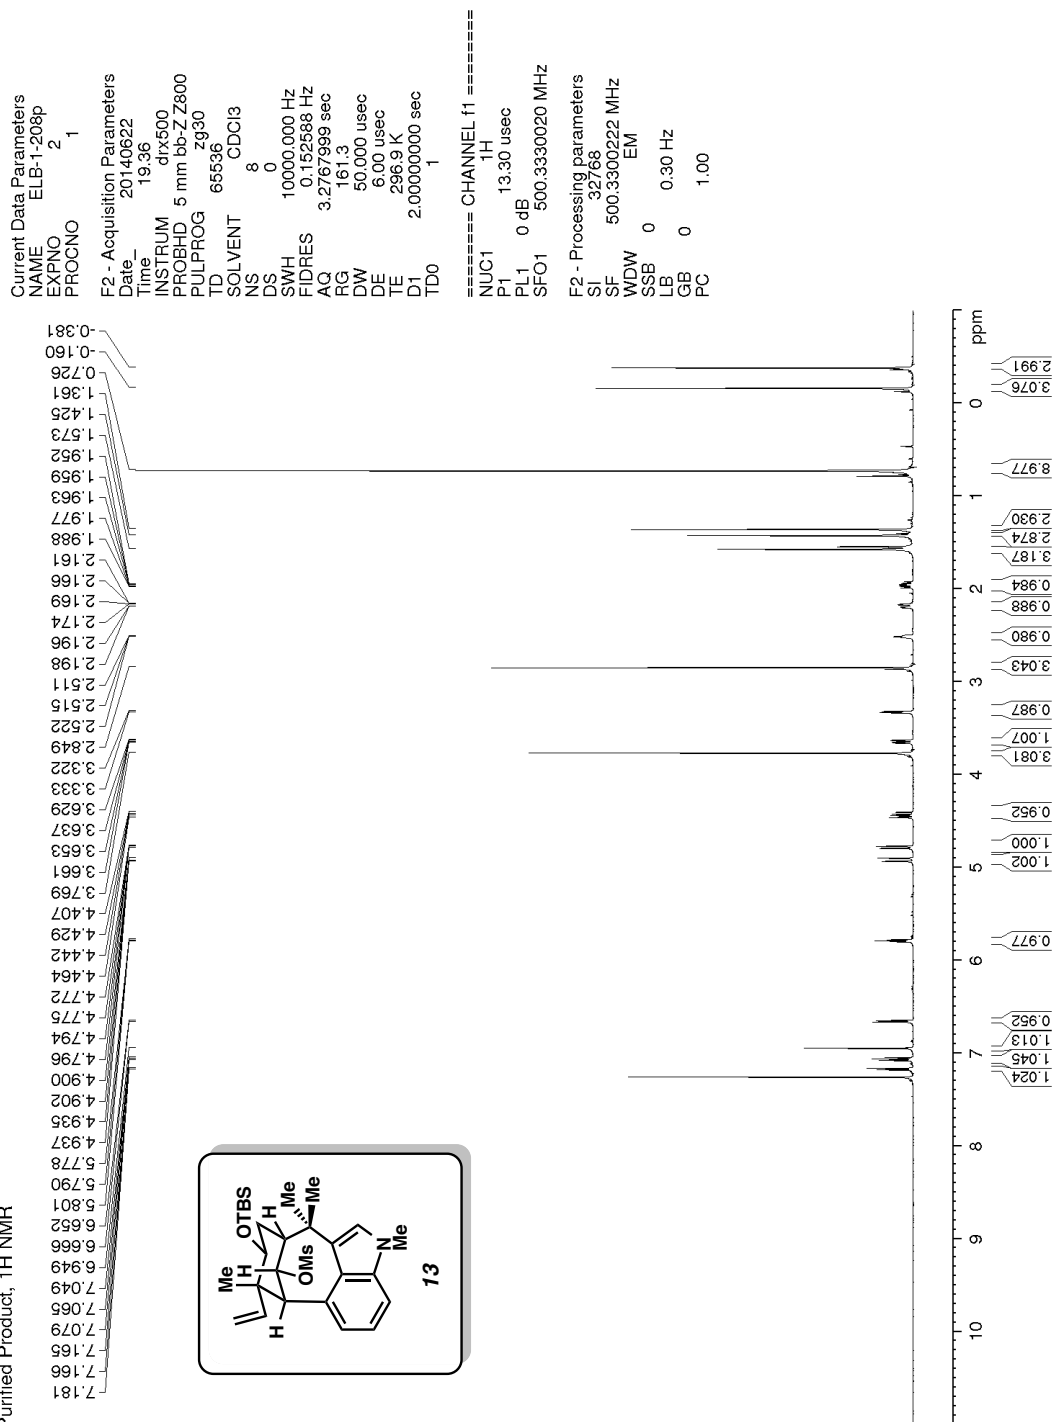



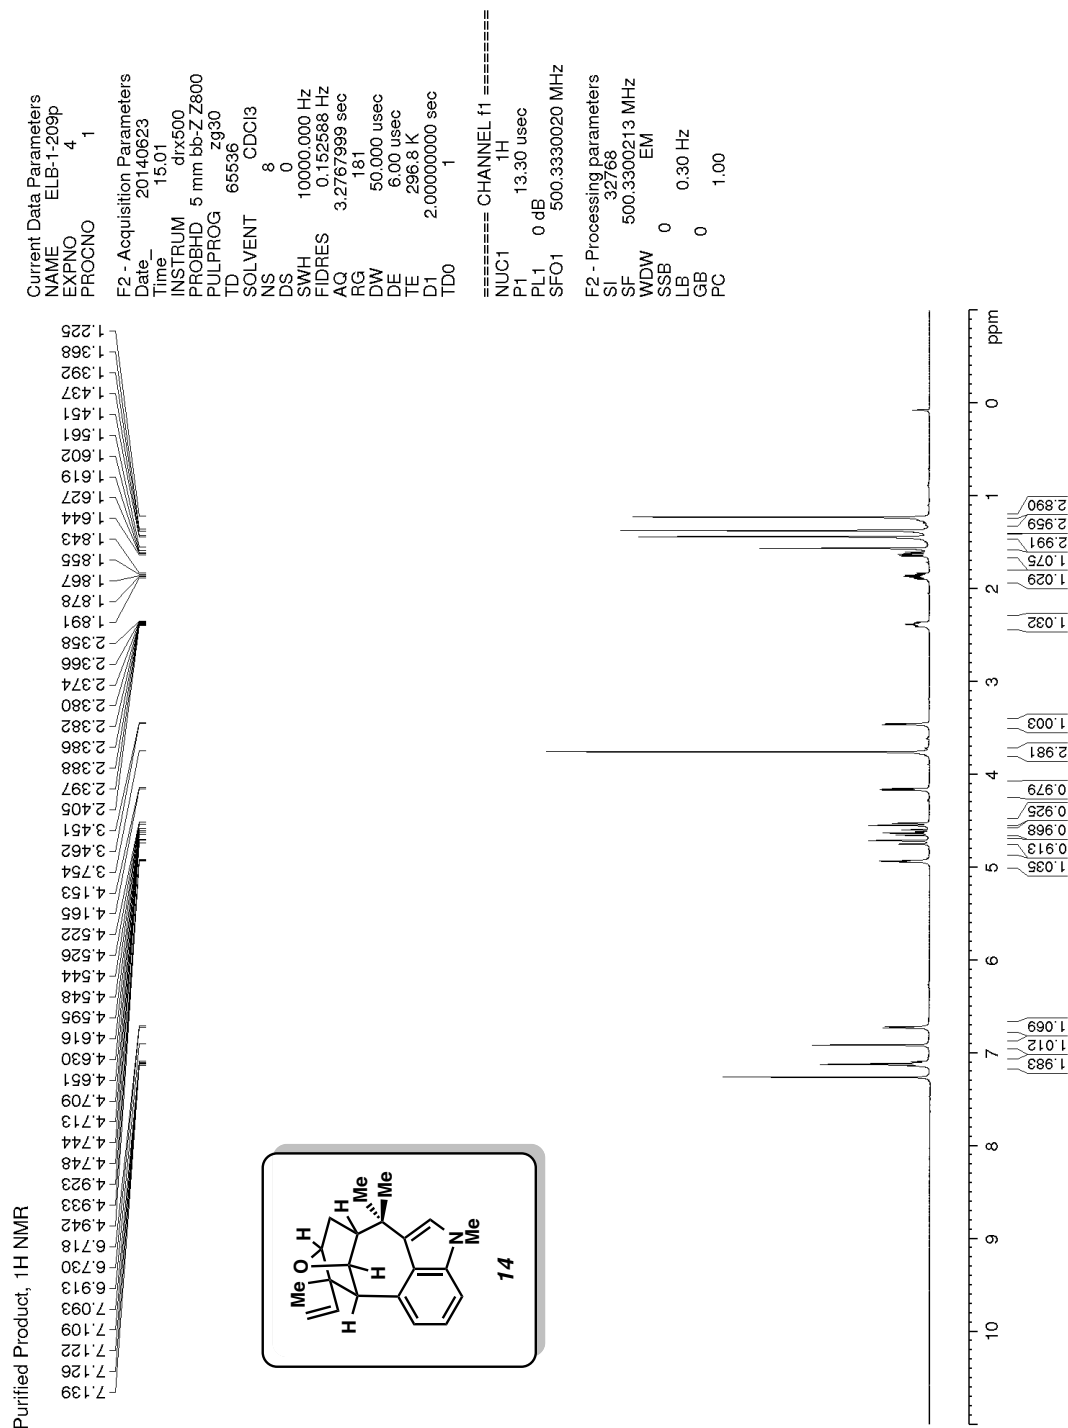

Purified Product, <sup>1</sup>H NMR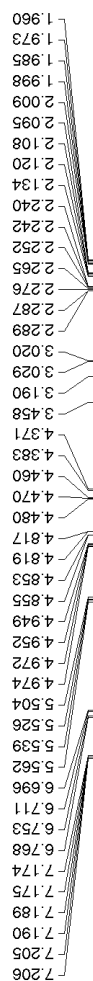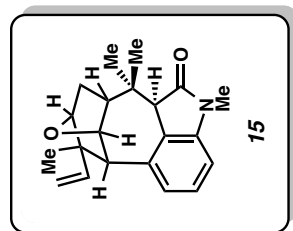

Current Data Parameters  
NAME NAW-2-097p  
EXPNO 10  
PROCNO 1

F2 - Acquisition Parameters  
Date\_ 20140525  
Time 12.50  
INSTRUM av500  
PROBHD 5 mm DCH 13C-1  
PULPROG zg30  
TD 65536  
SOLVENT CDCl3  
NS 8  
DS 0  
SWH 10000.000 Hz  
FIDRES 0.152588 Hz  
AQ 3.2767999 sec  
RG 12.14  
DW 50.000 usec  
DE 10.00 usec  
TE 298.0 K  
D1 2.00000000 sec  
TD0 1

===== CHANNEL f1 =====  
SFO1 500.1330008 MHz  
NUC1 1H  
P1 10.00 usec  
PLW1 13.50000000 W

F2 - Processing parameters  
SI 65536  
SF 500.1300121 MHz  
WDW EM  
SSB 0  
LB 0.30 Hz  
GB 0  
PC 1.00

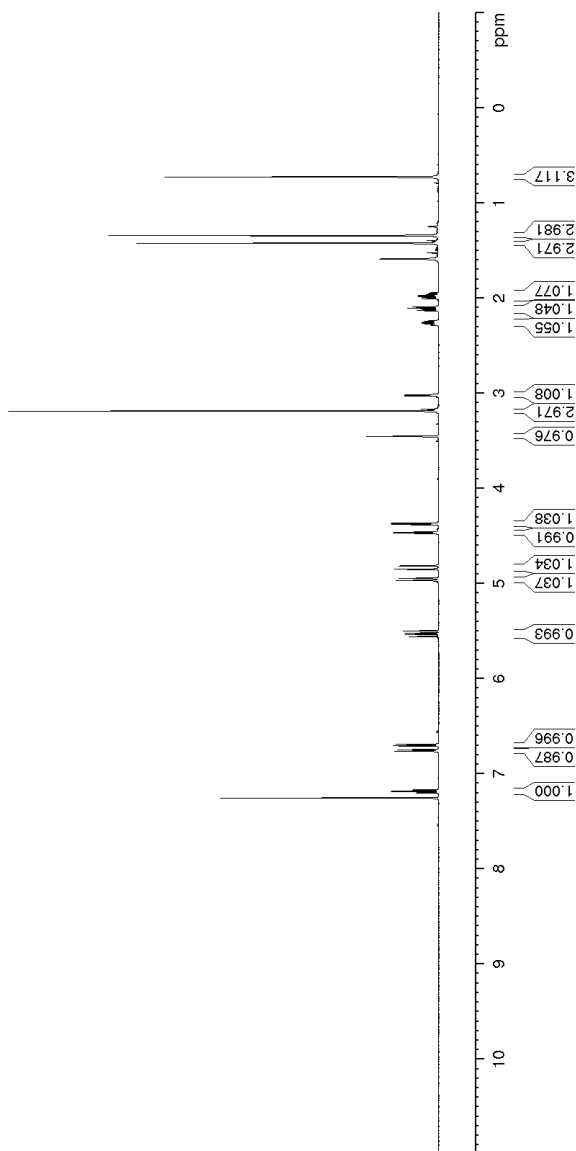

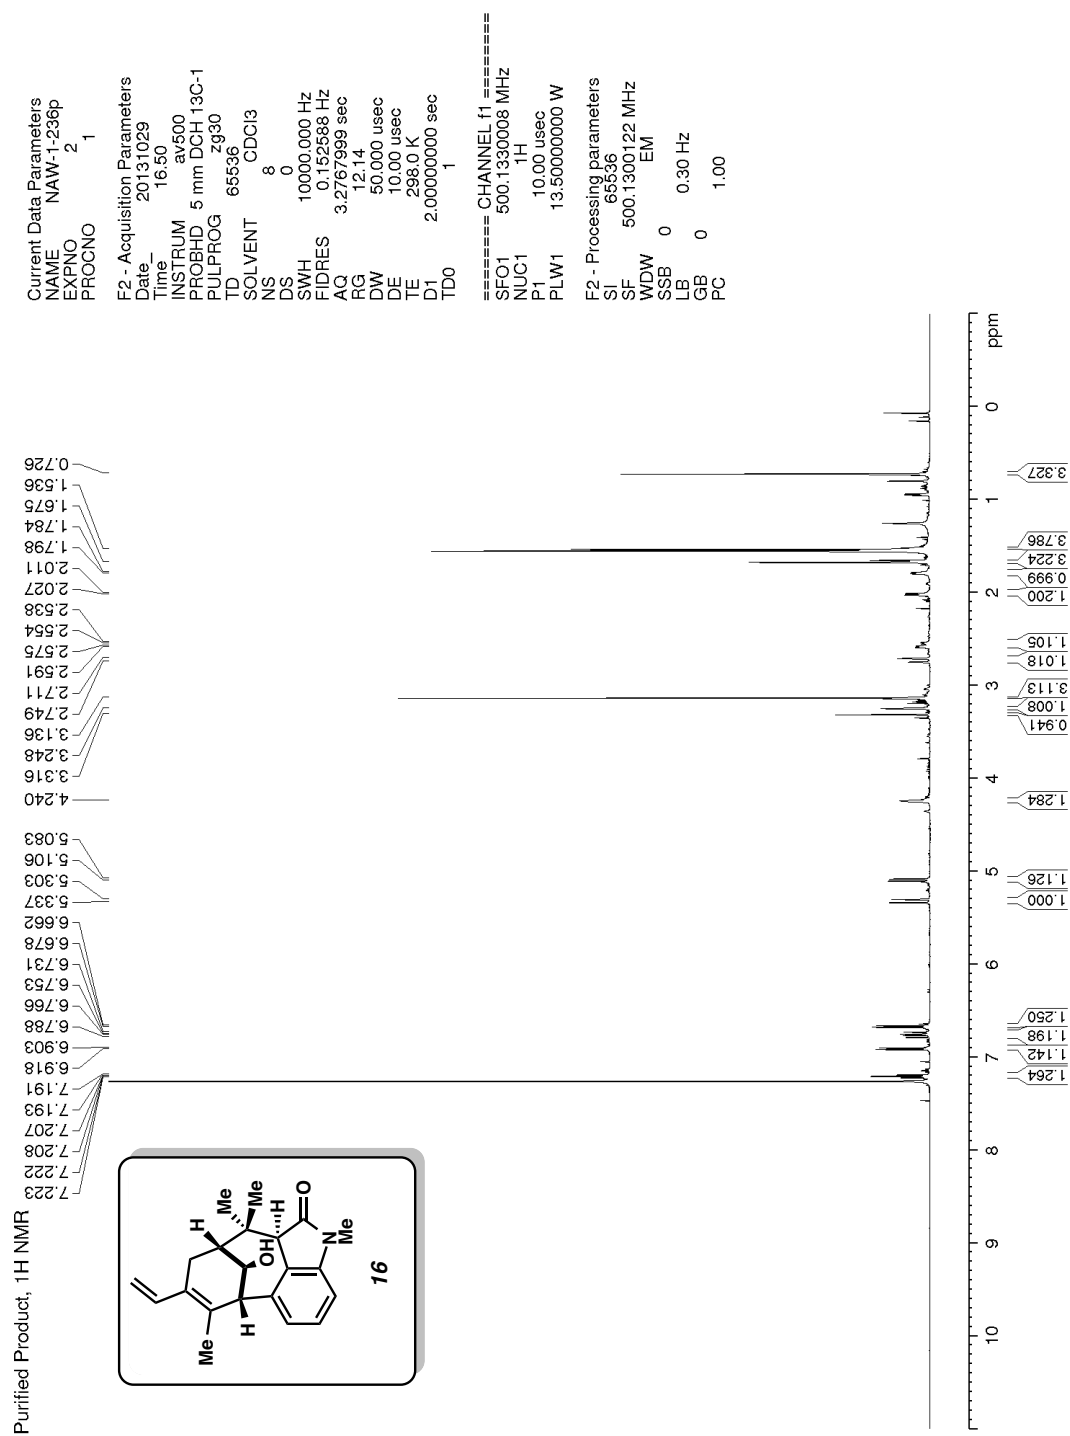

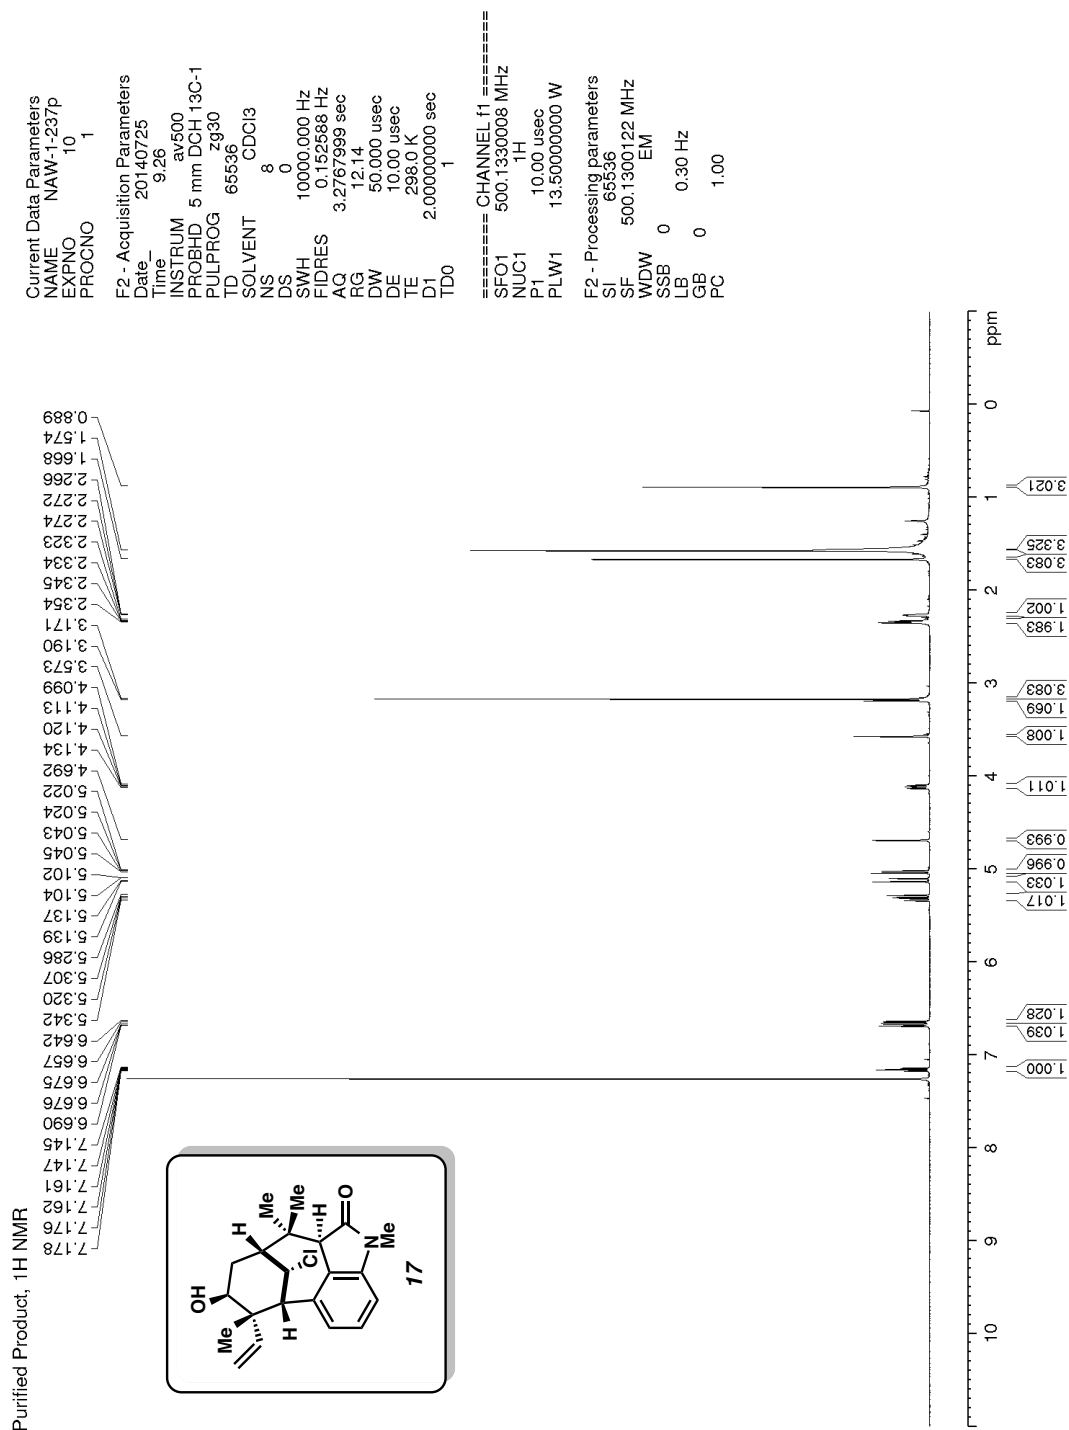

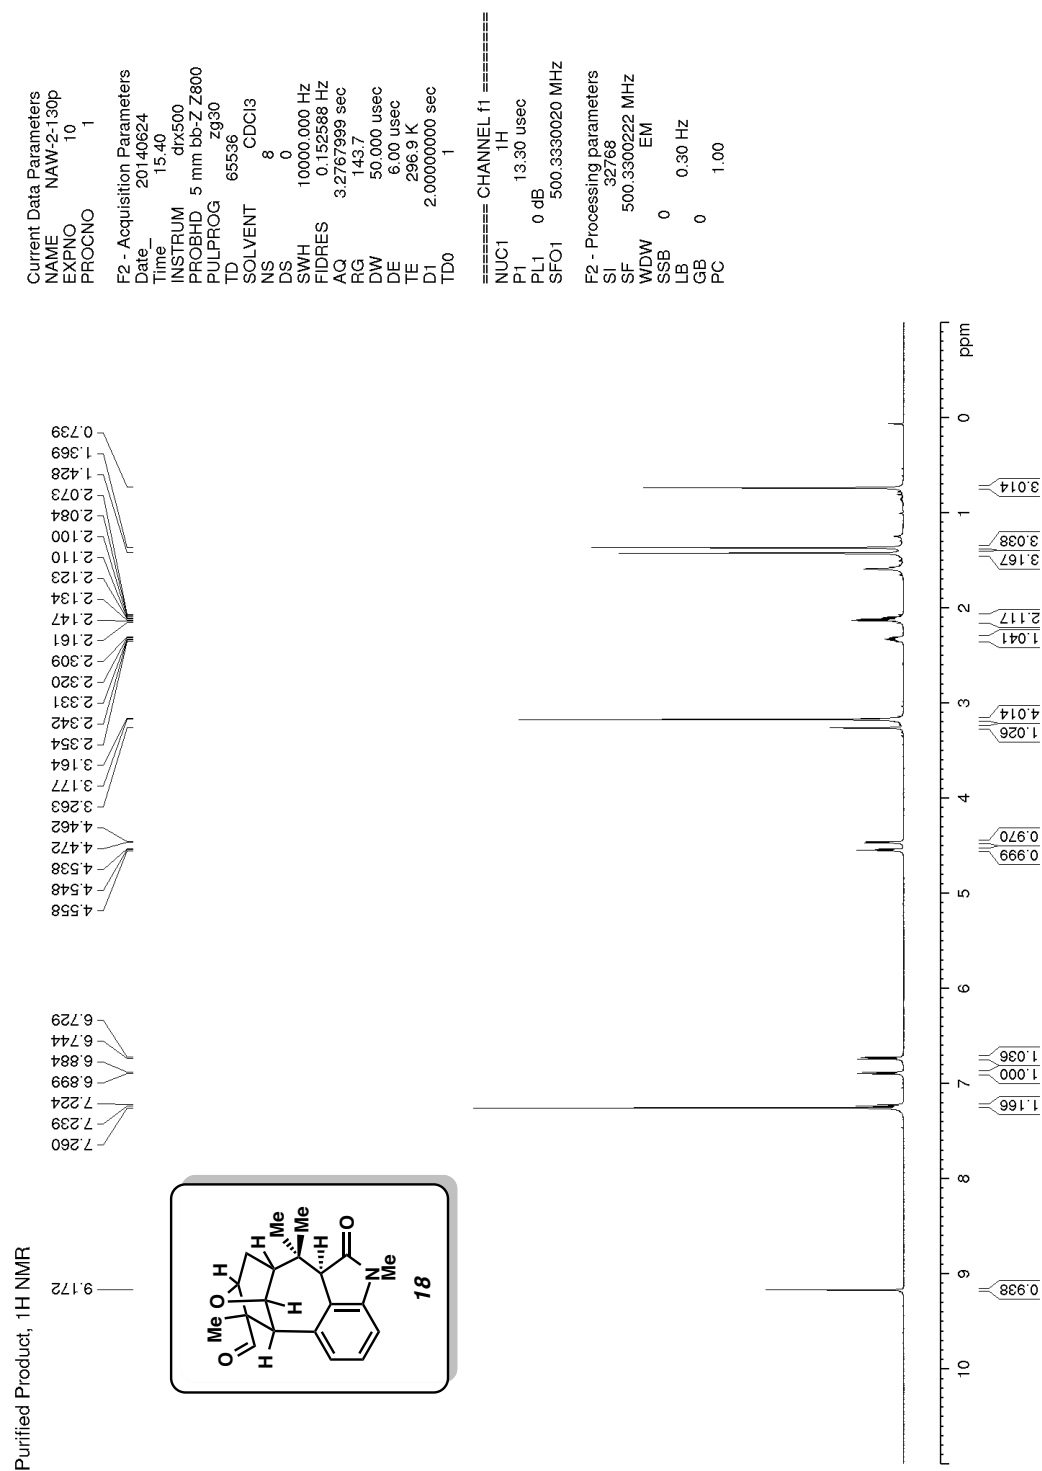

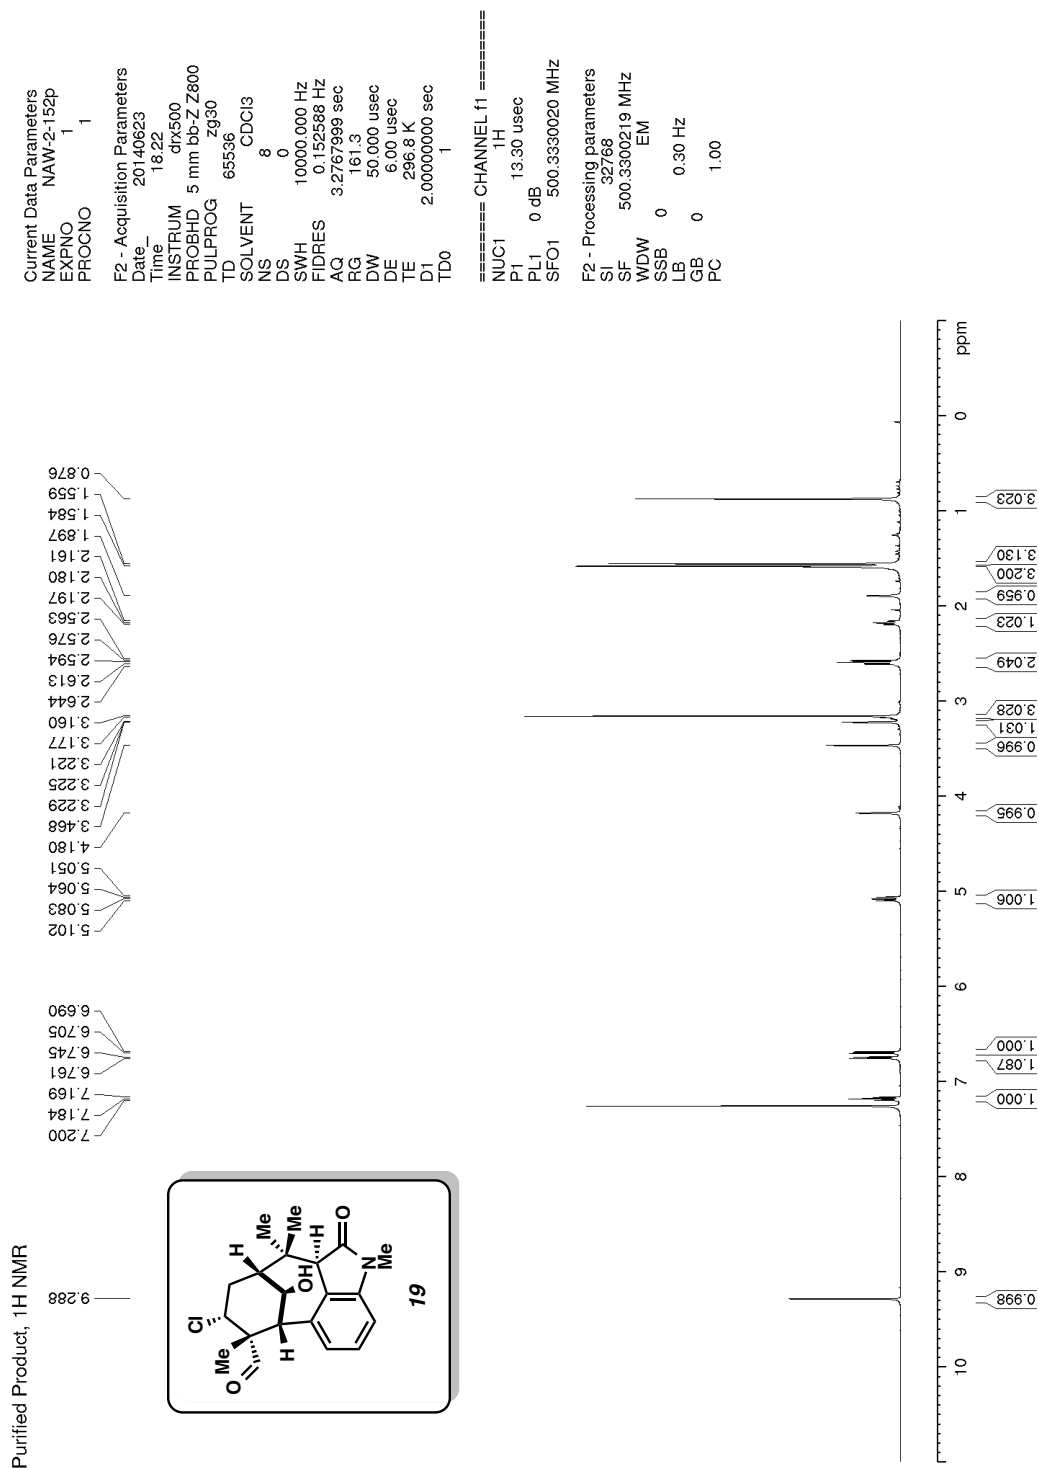

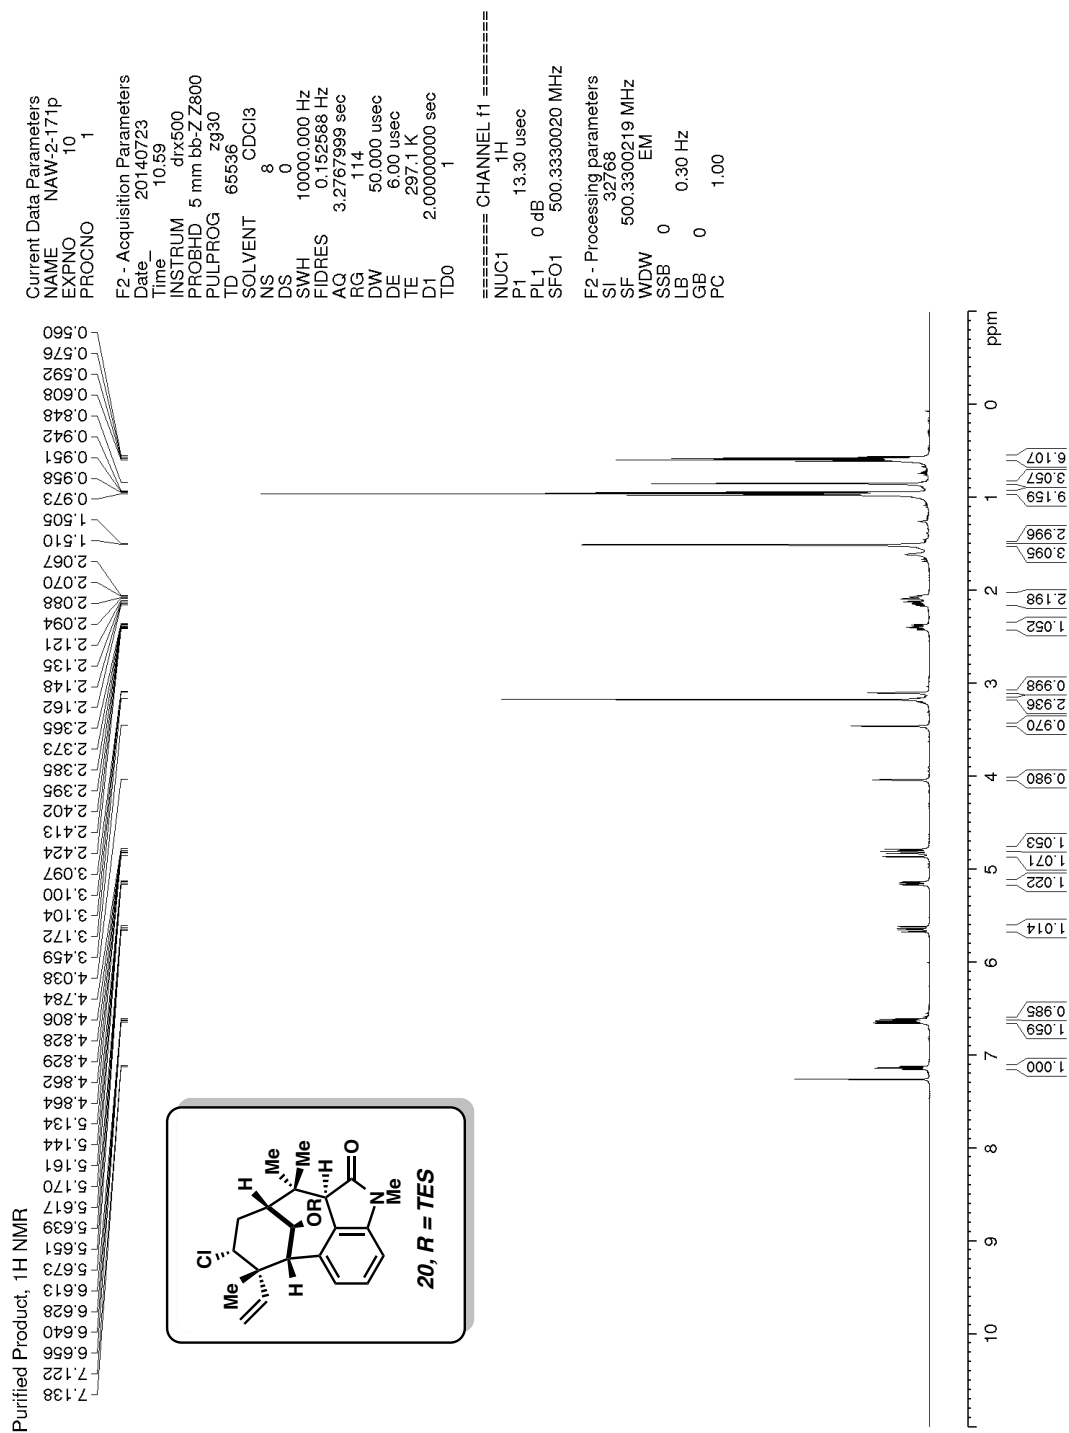

Purified Product, <sup>1</sup>H NMR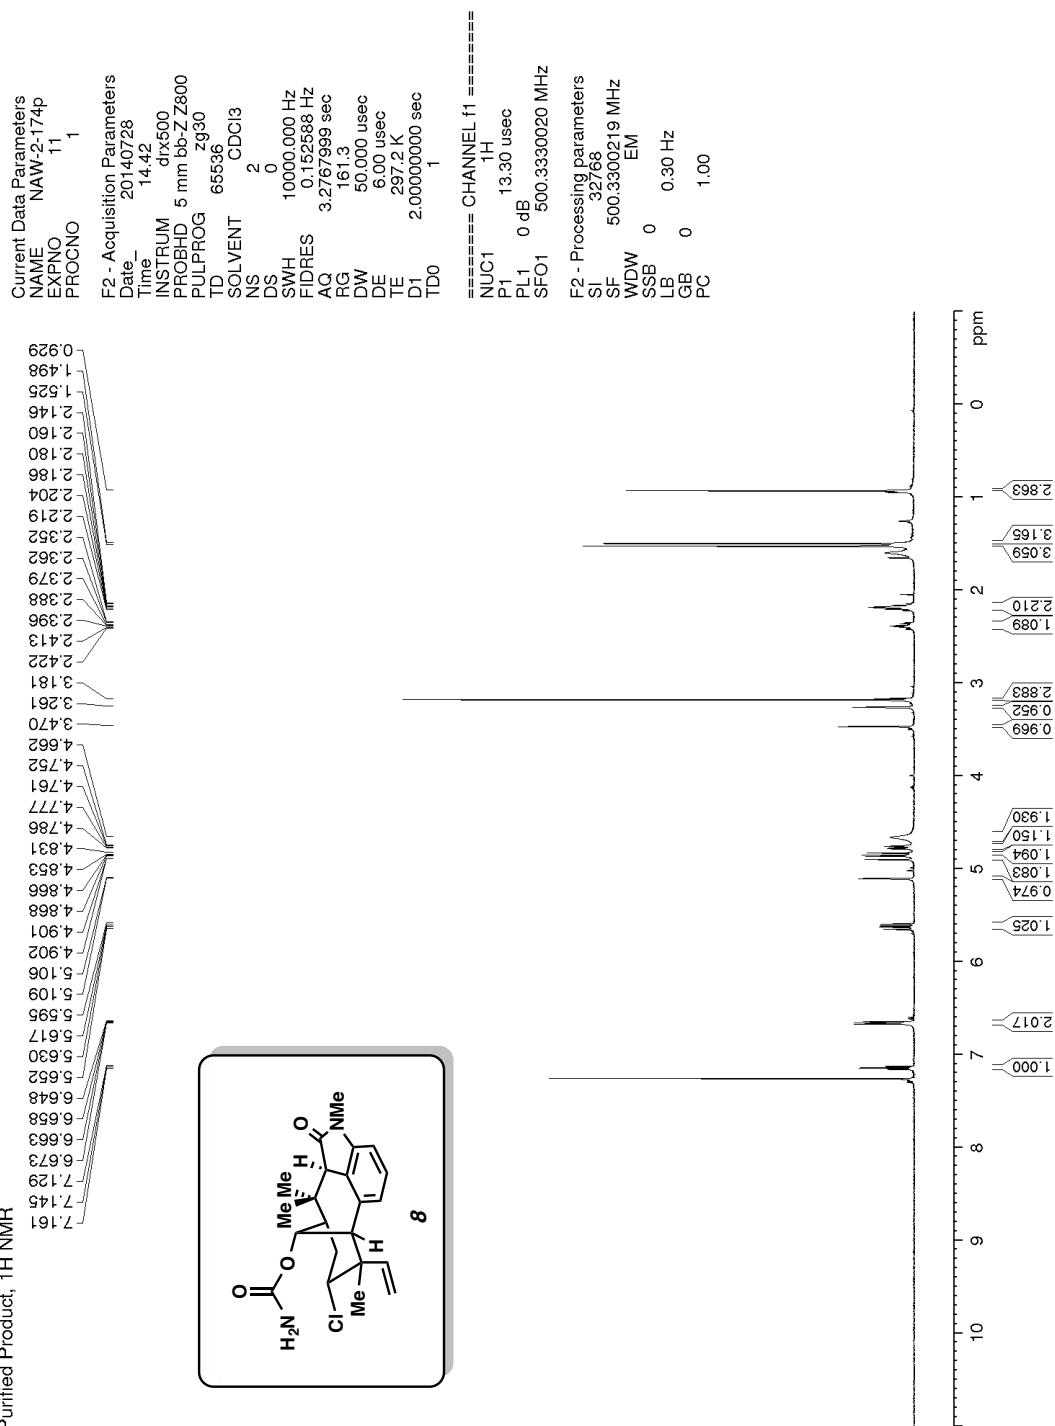



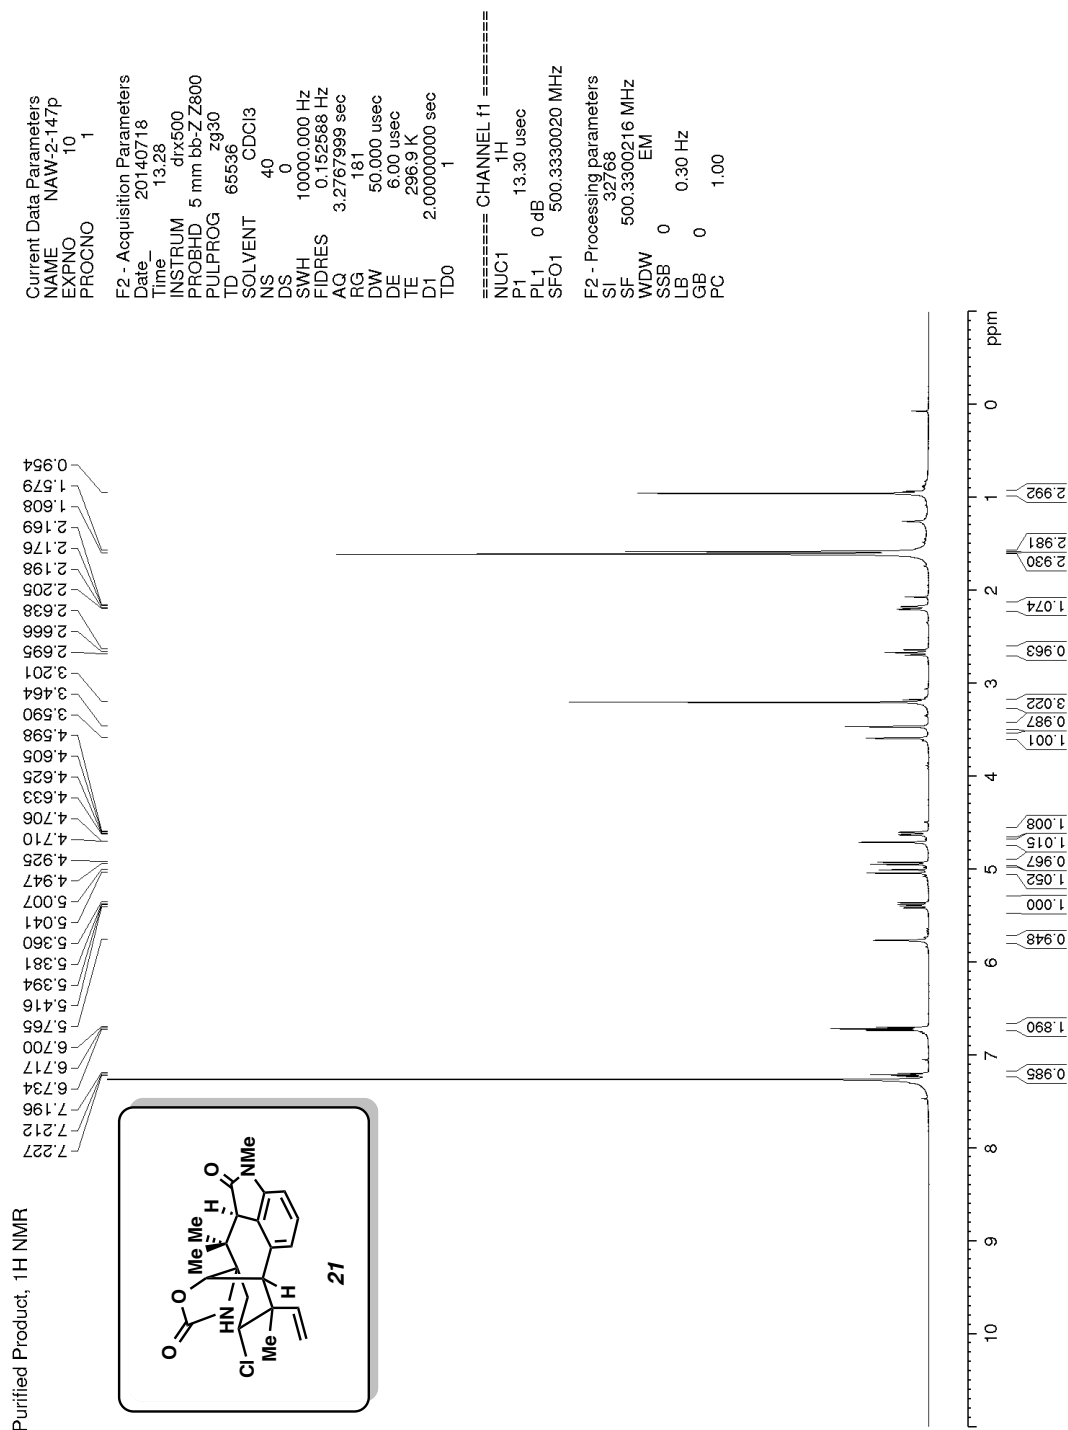

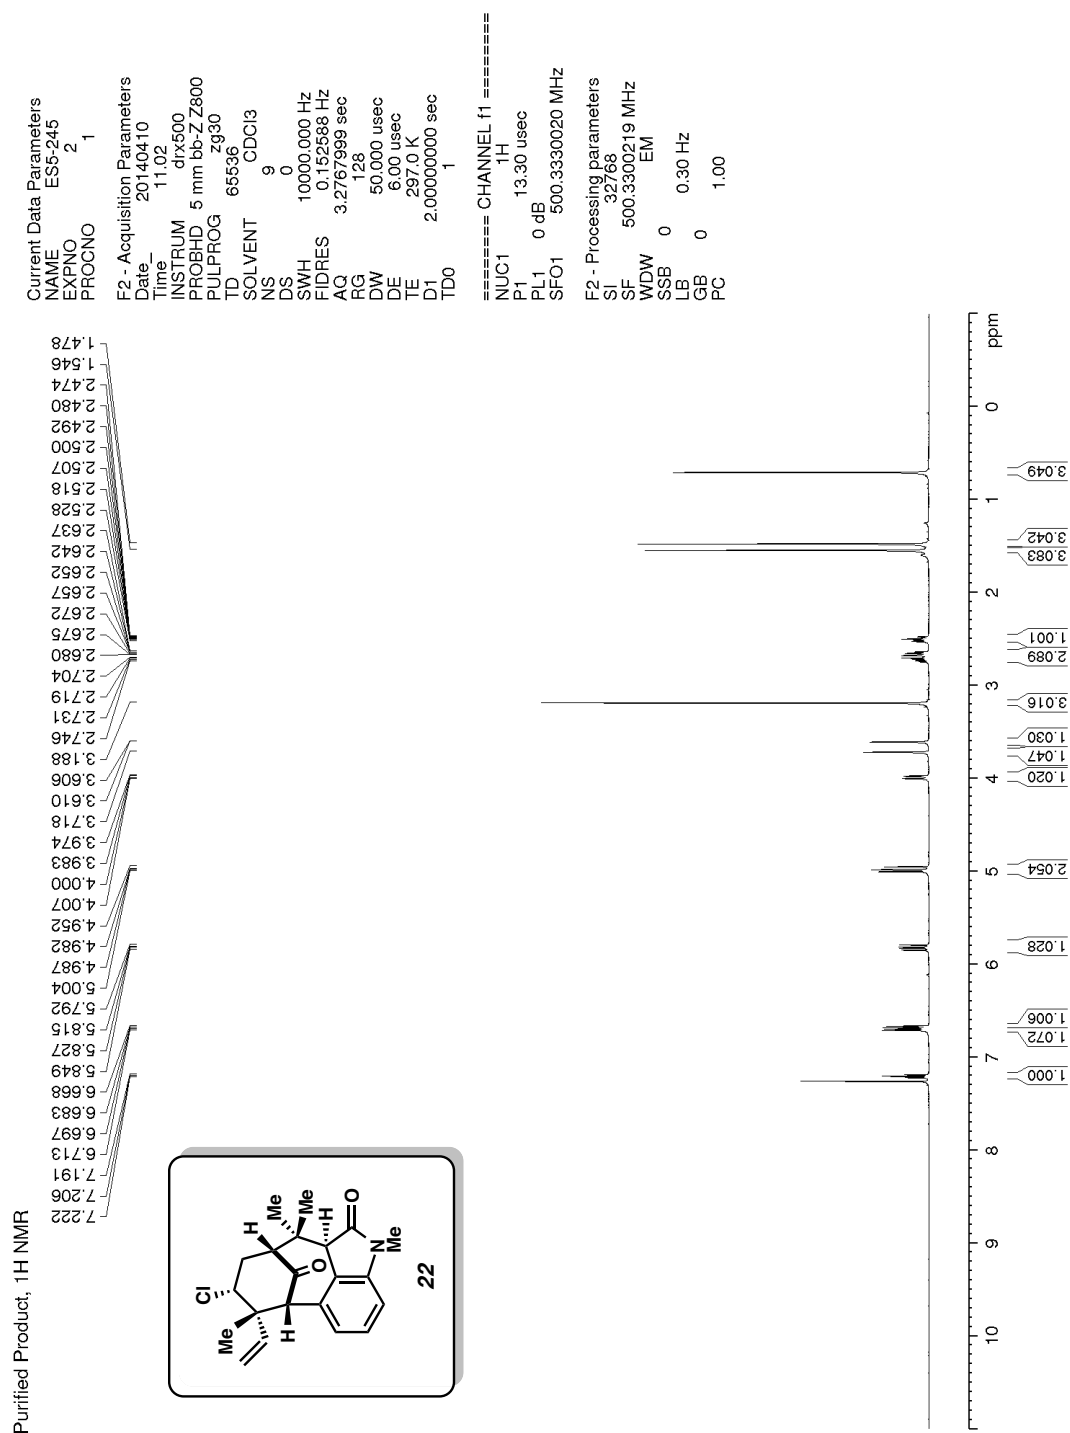

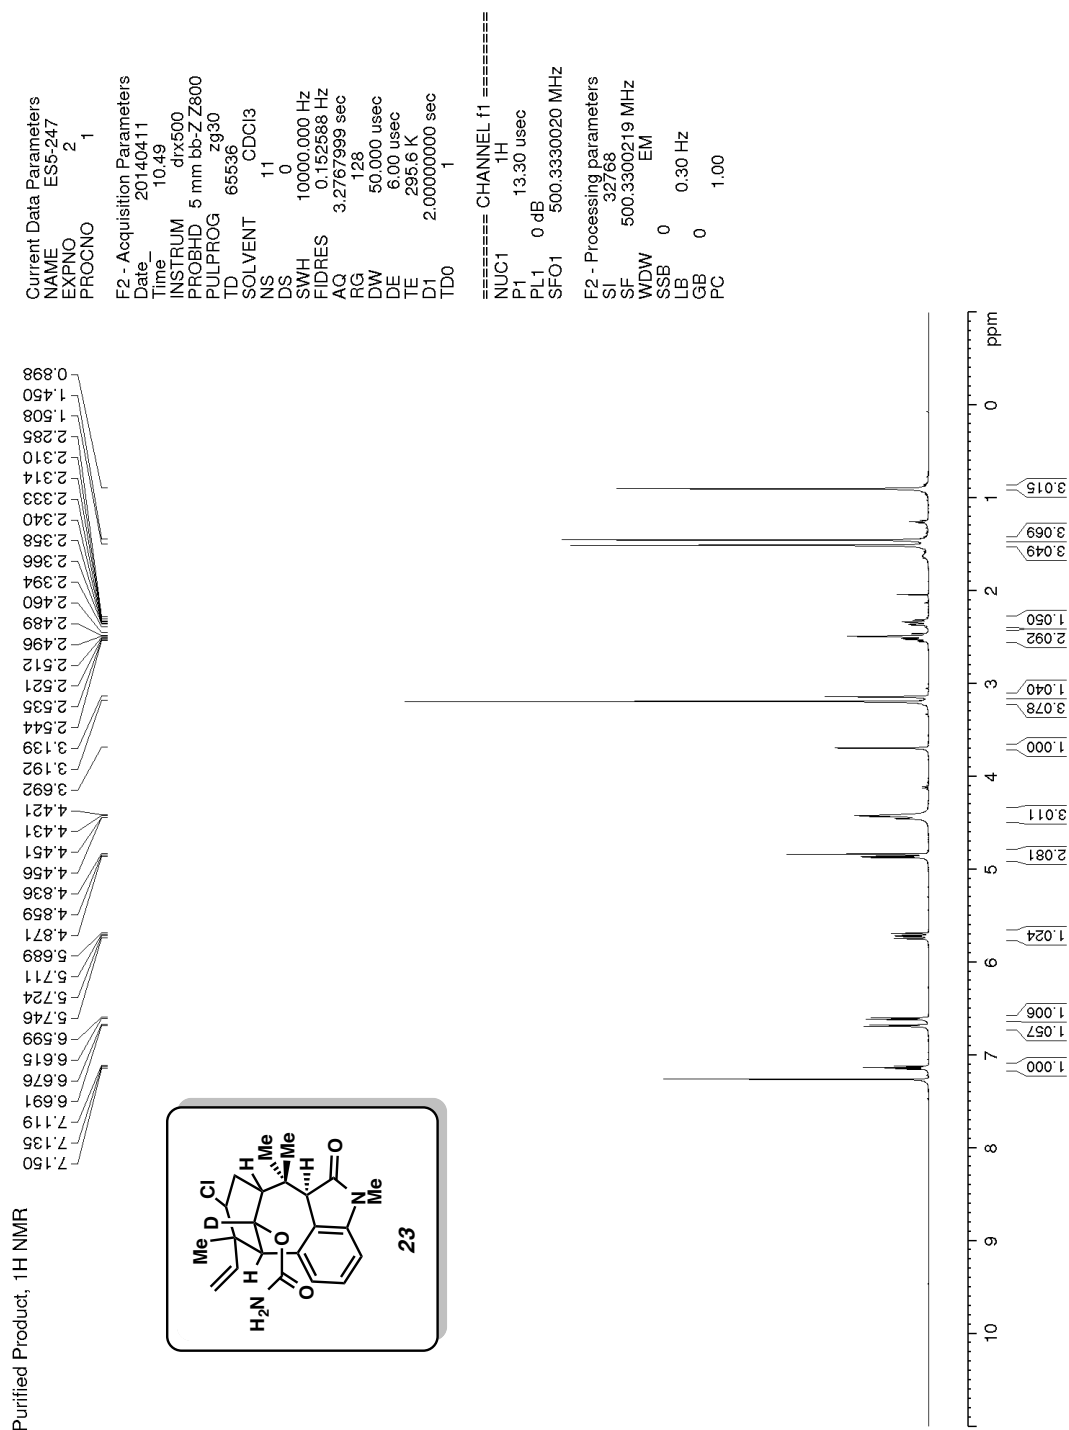

Purified Product, 2H NMR

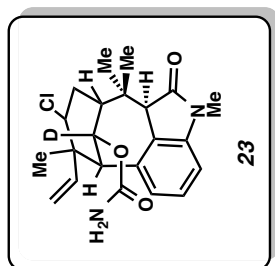

Current Data Parameters  
NAME ES-300  
EXPNO 3  
PROCNO 1

F2 - Acquisition Parameters  
Date\_ 20140520  
Time\_ 13:19  
INSTRUM av500  
PROBHD 5 mm DCH 13C-1  
PULPROG zgpg30  
TD 13820  
SOLVENT CDCl<sub>3</sub>  
NS 14  
DS 0  
SWH 1535.627 Hz  
FIDRES 0.111116 Hz  
AQ 4.4997921 sec  
RG 2.75  
DW 325.600 usec  
DE 18.00 usec  
TE 300.0 K  
D1 2.00000000 sec  
D11 0.03000000 sec  
TD0 1

===== CHANNEL f1 =====  
SFO1 76.7734606 MHz  
NUC1 2H  
P1 225.00 usec  
PLW1 3.00000000 W

F2 - Processing parameters  
SI 65536  
SF 76.7729983 MHz  
WDW EM  
SSB 0  
LB 0.30 Hz  
GB 0  
PC 1.00

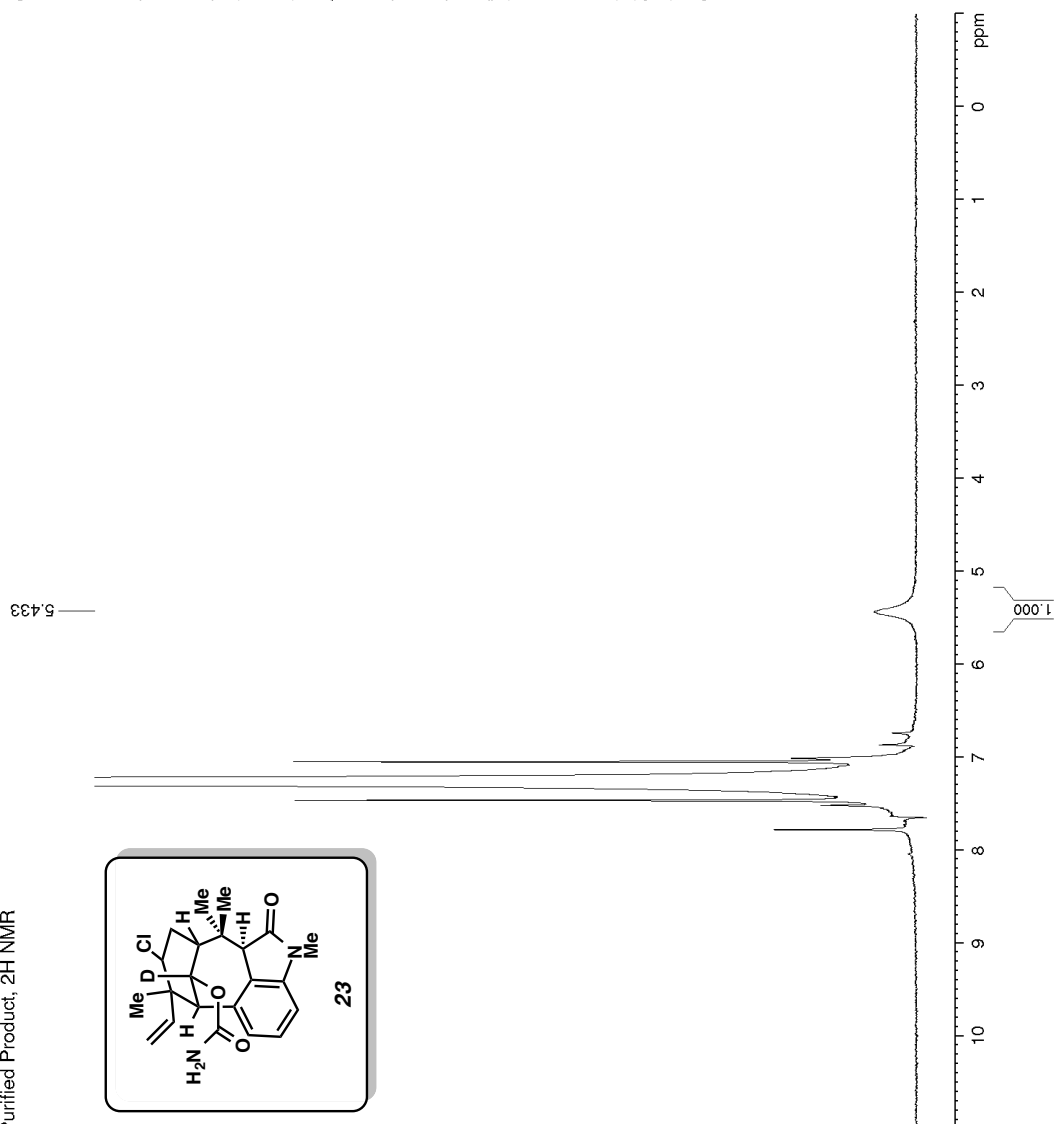

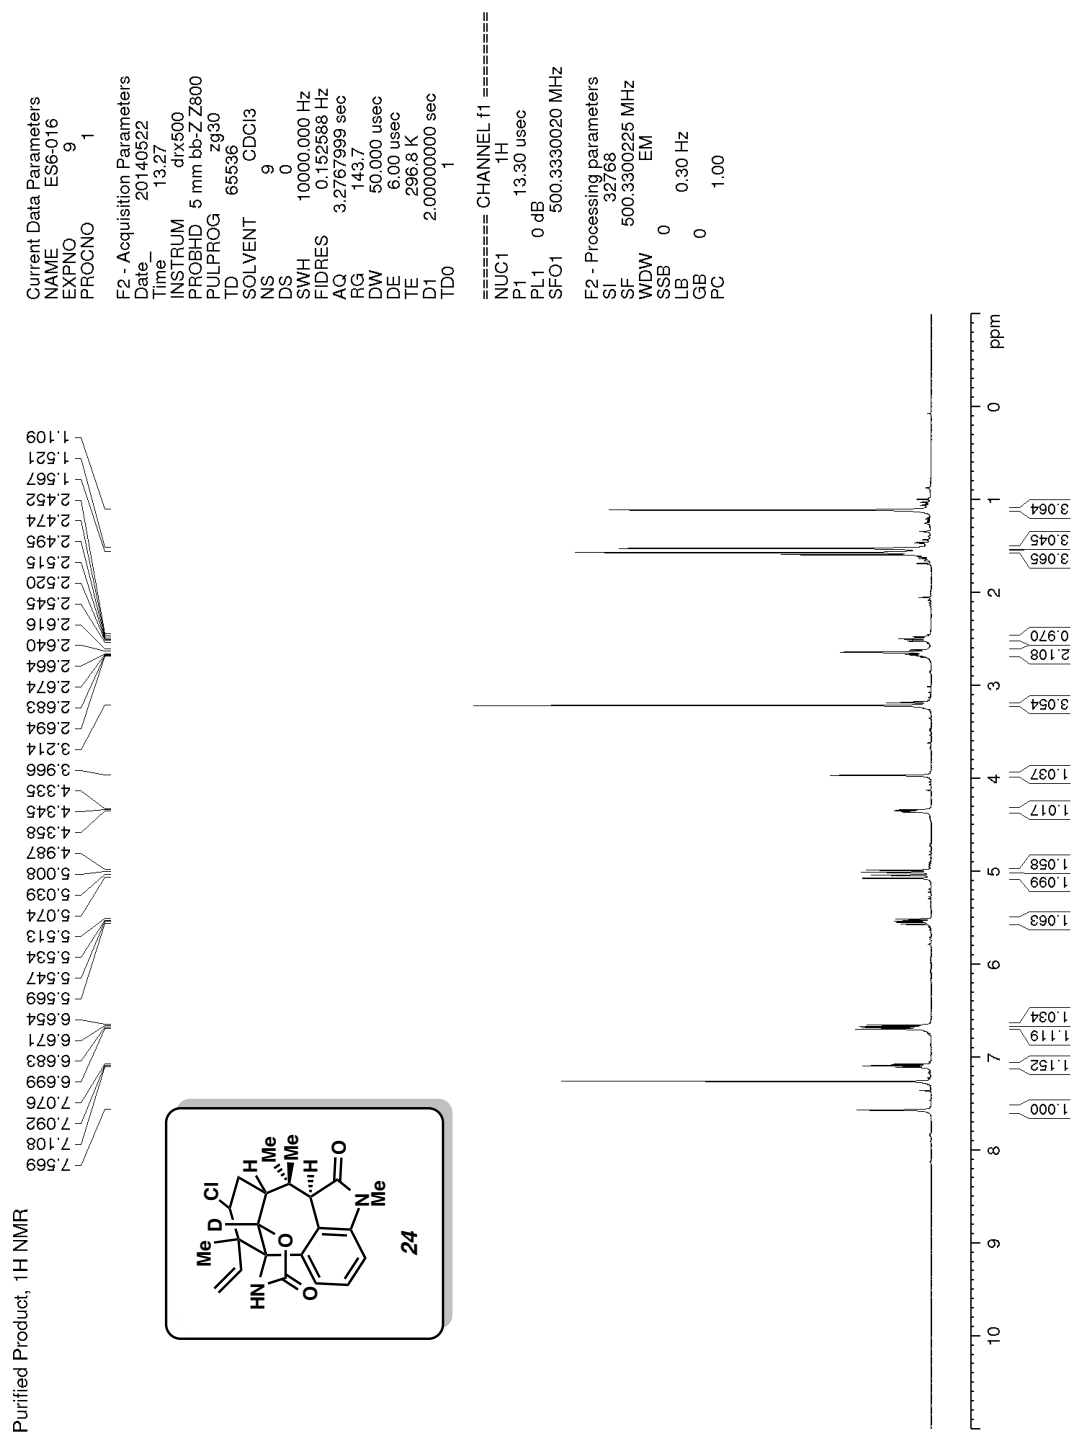

Purified Product, 2H NMR

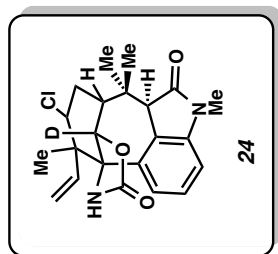

Current Data Parameters  
 NAME ES6-016  
 EXPNO 7  
 PROCNO 1

F2 - Acquisition Parameters  
 Date\_ 20140522  
 Time\_ 12:03  
 INSTRUM av500  
 PROBHD 5 mm DCH 13C-1  
 PULPROG zgpg30  
 TD 13820  
 SOLVENT CDCl3  
 NS 22  
 DS 0  
 SWH 1535.627 Hz  
 FIDRES 0.111116 Hz  
 AQ 4.4997921 sec  
 RG 2.75  
 DW 325.600 usec  
 DE 18.00 usec  
 TE 300.0 K  
 D1 2.00000000 sec  
 D11 0.03000000 sec  
 TD0 1

===== CHANNEL f1 =====  
 SFO1 76.7734606 MHz  
 NUC1 2H  
 P1 225.00 usec  
 PLW1 3.00000000 W

F2 - Processing parameters  
 SI 65536  
 SF 76.7729981 MHz  
 WDW EM  
 SSB 0  
 LB 0.30 Hz  
 GB 0  
 PC 1.00

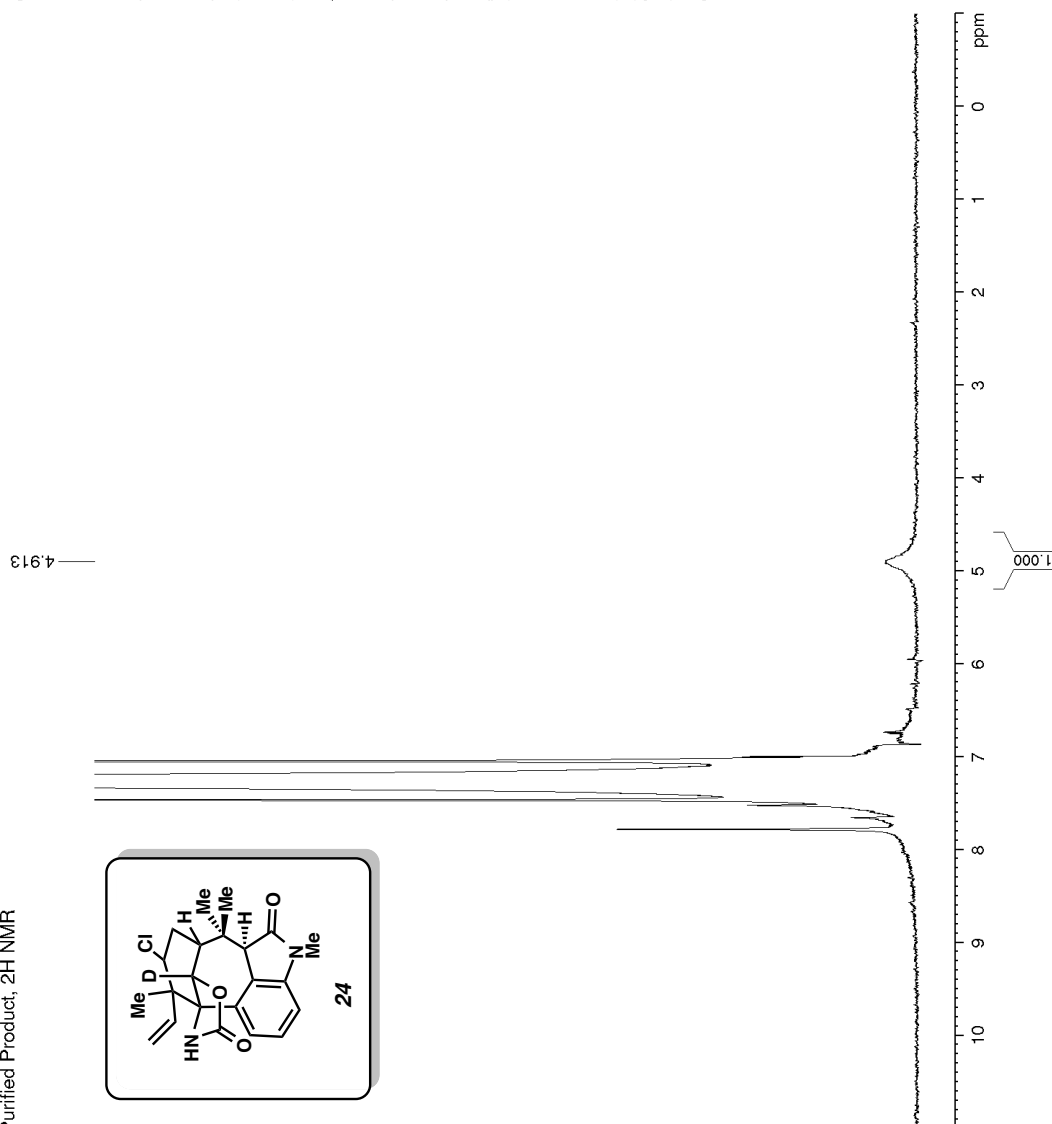

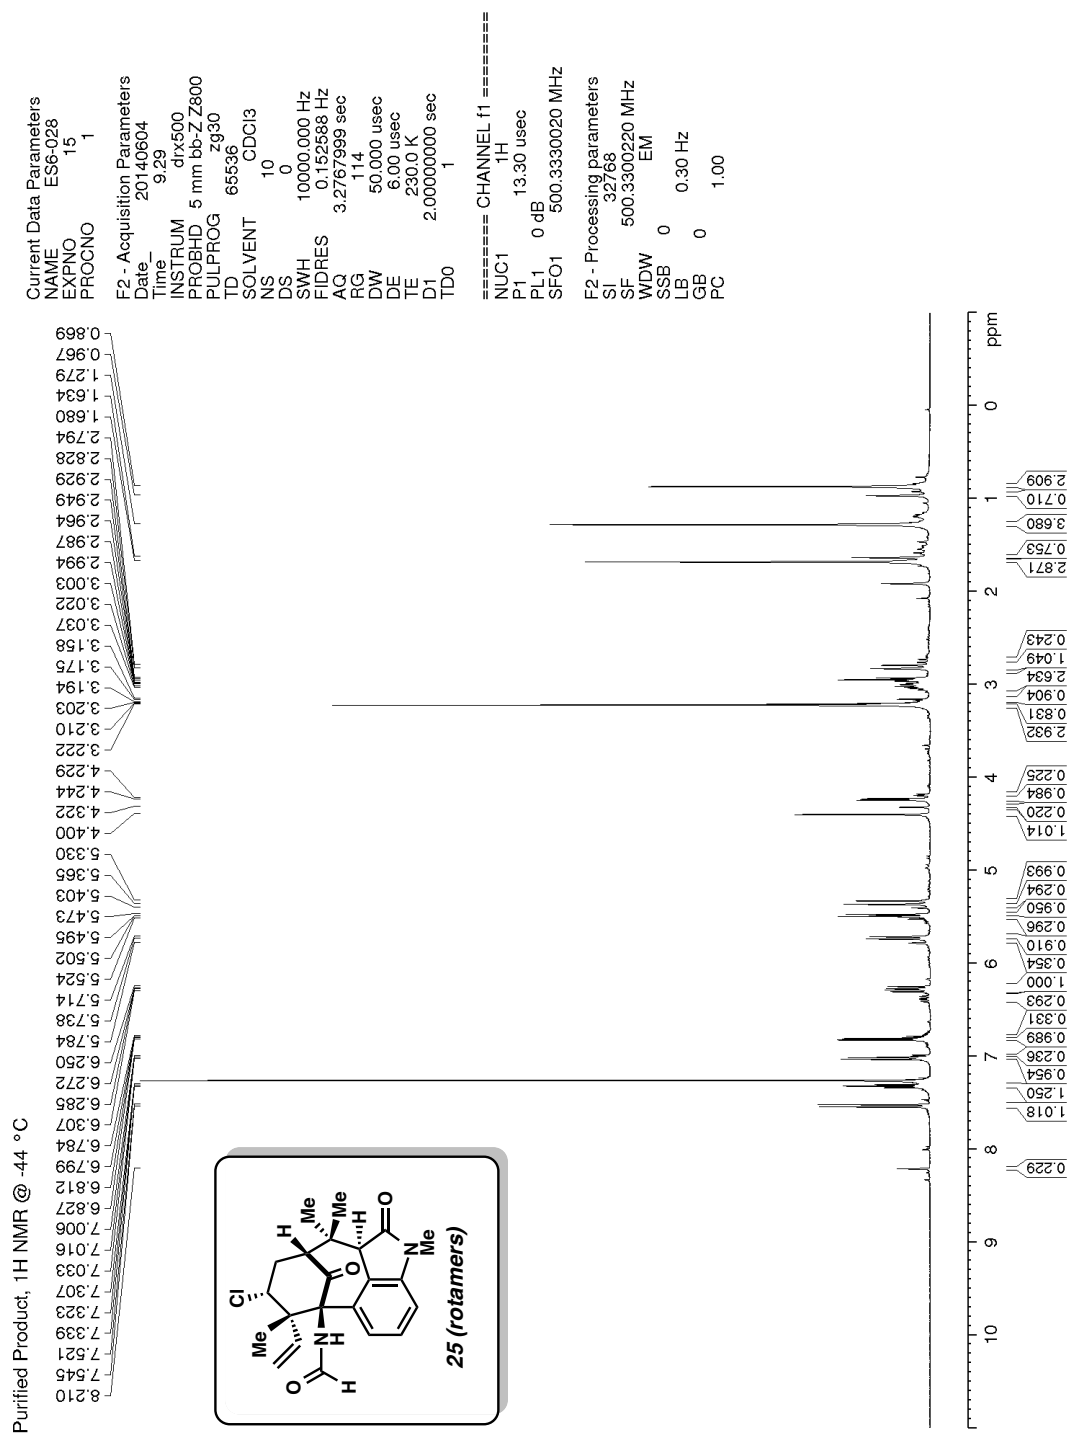

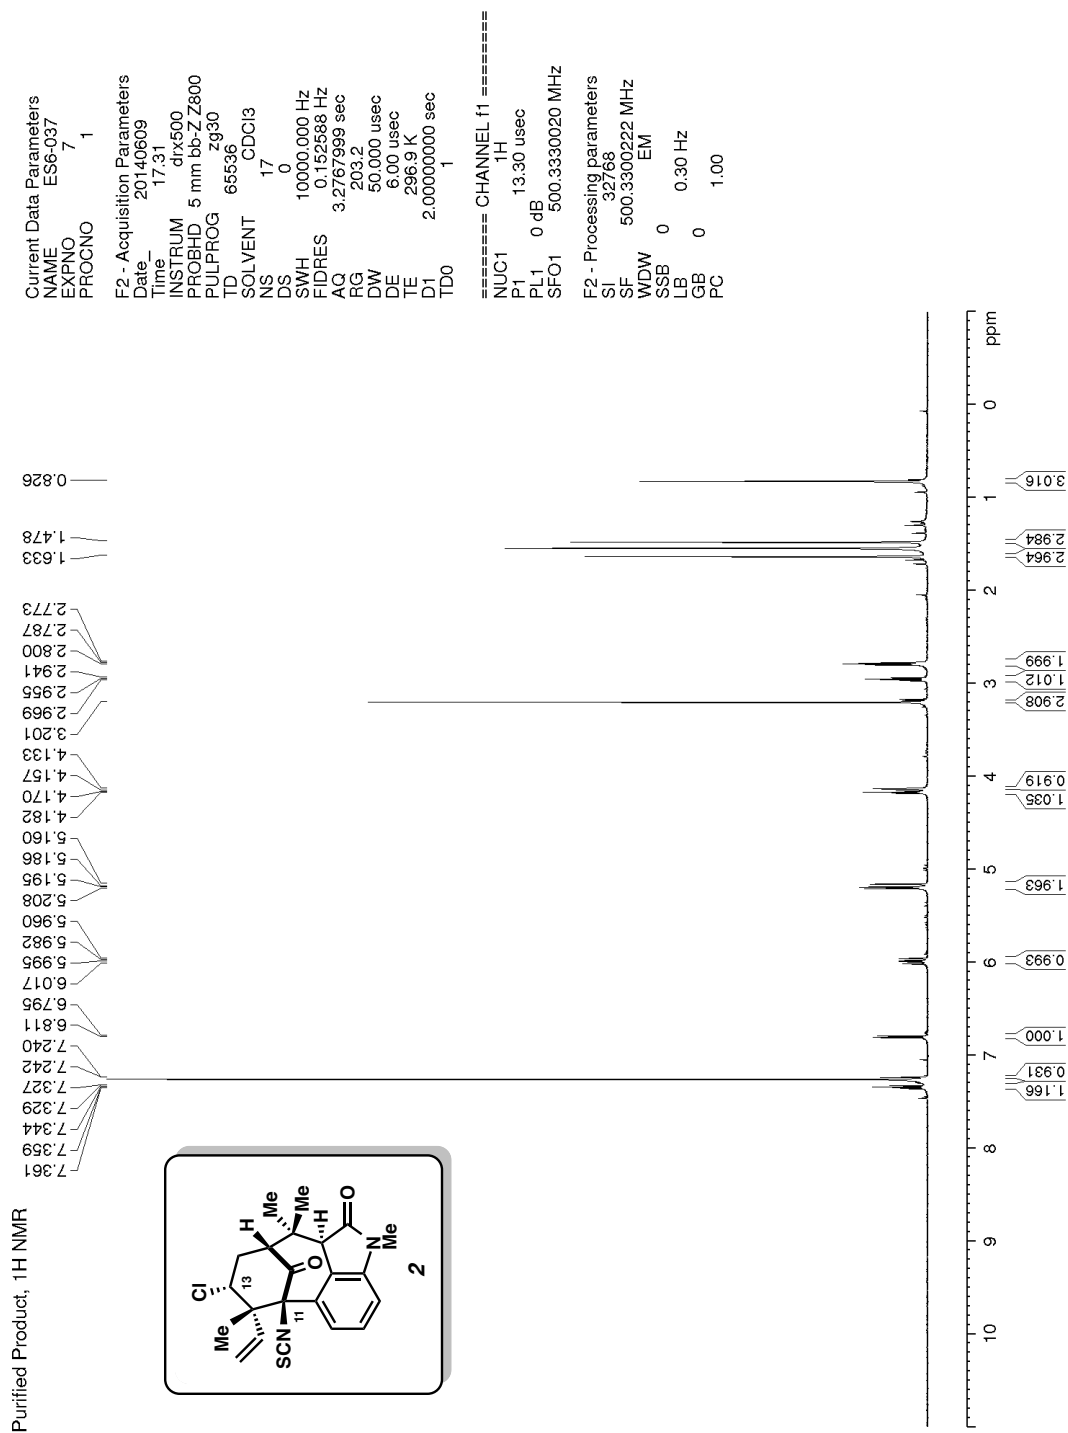



**$^{13}\text{C}$  NMR Spectra:**

Purified Product, <sup>13</sup>C NMR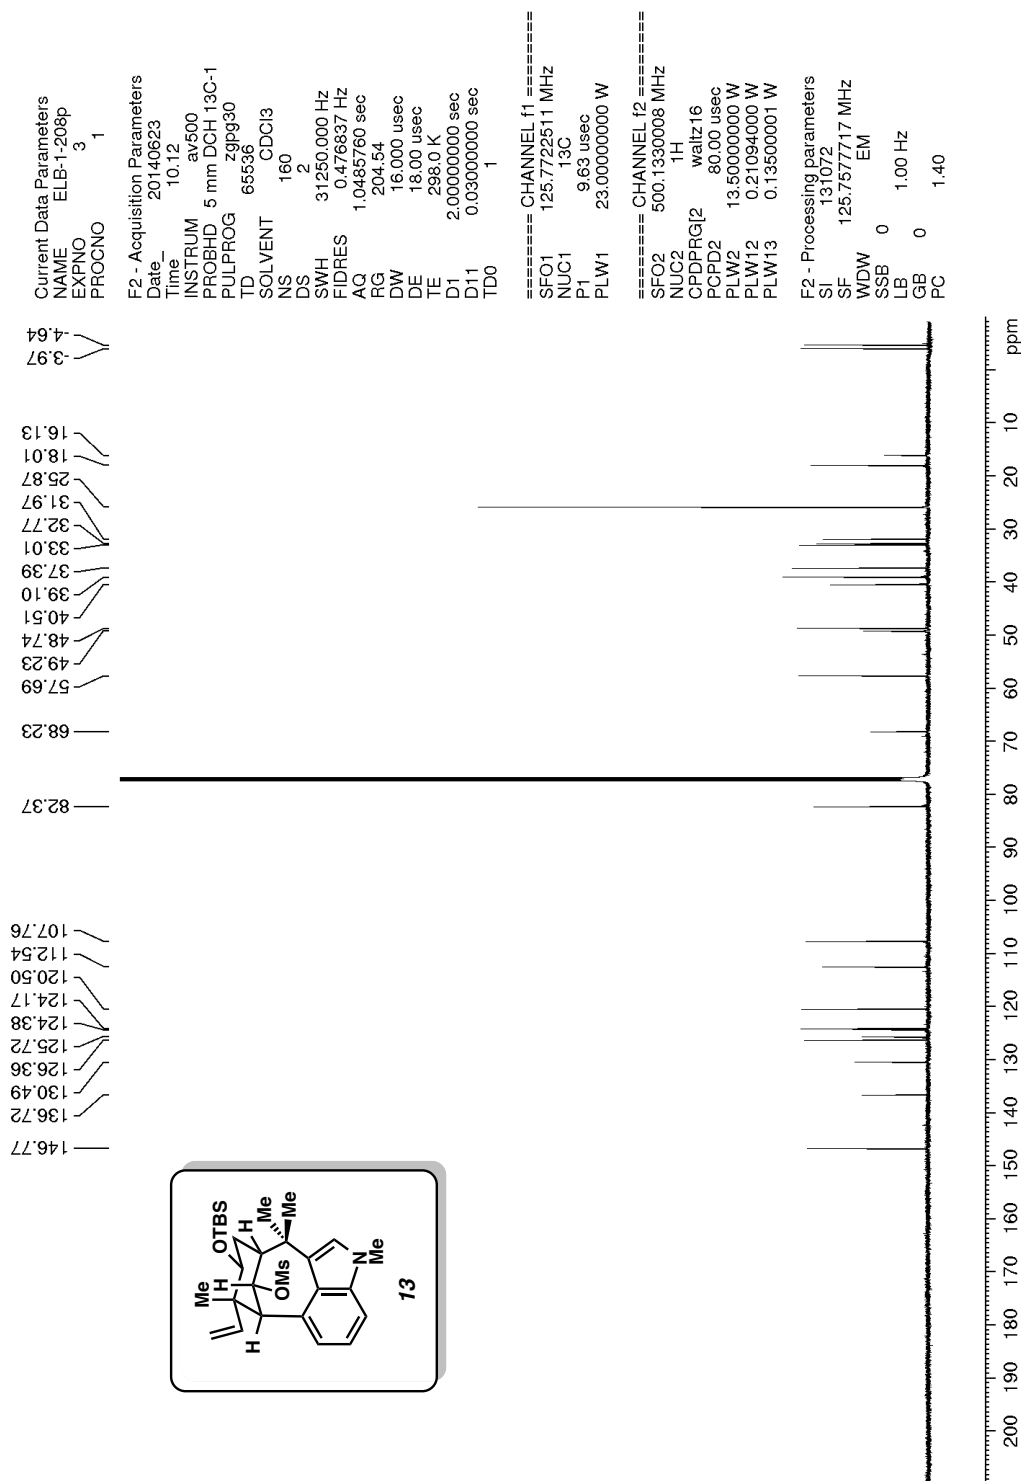

Purified Product, <sup>13</sup>C NMR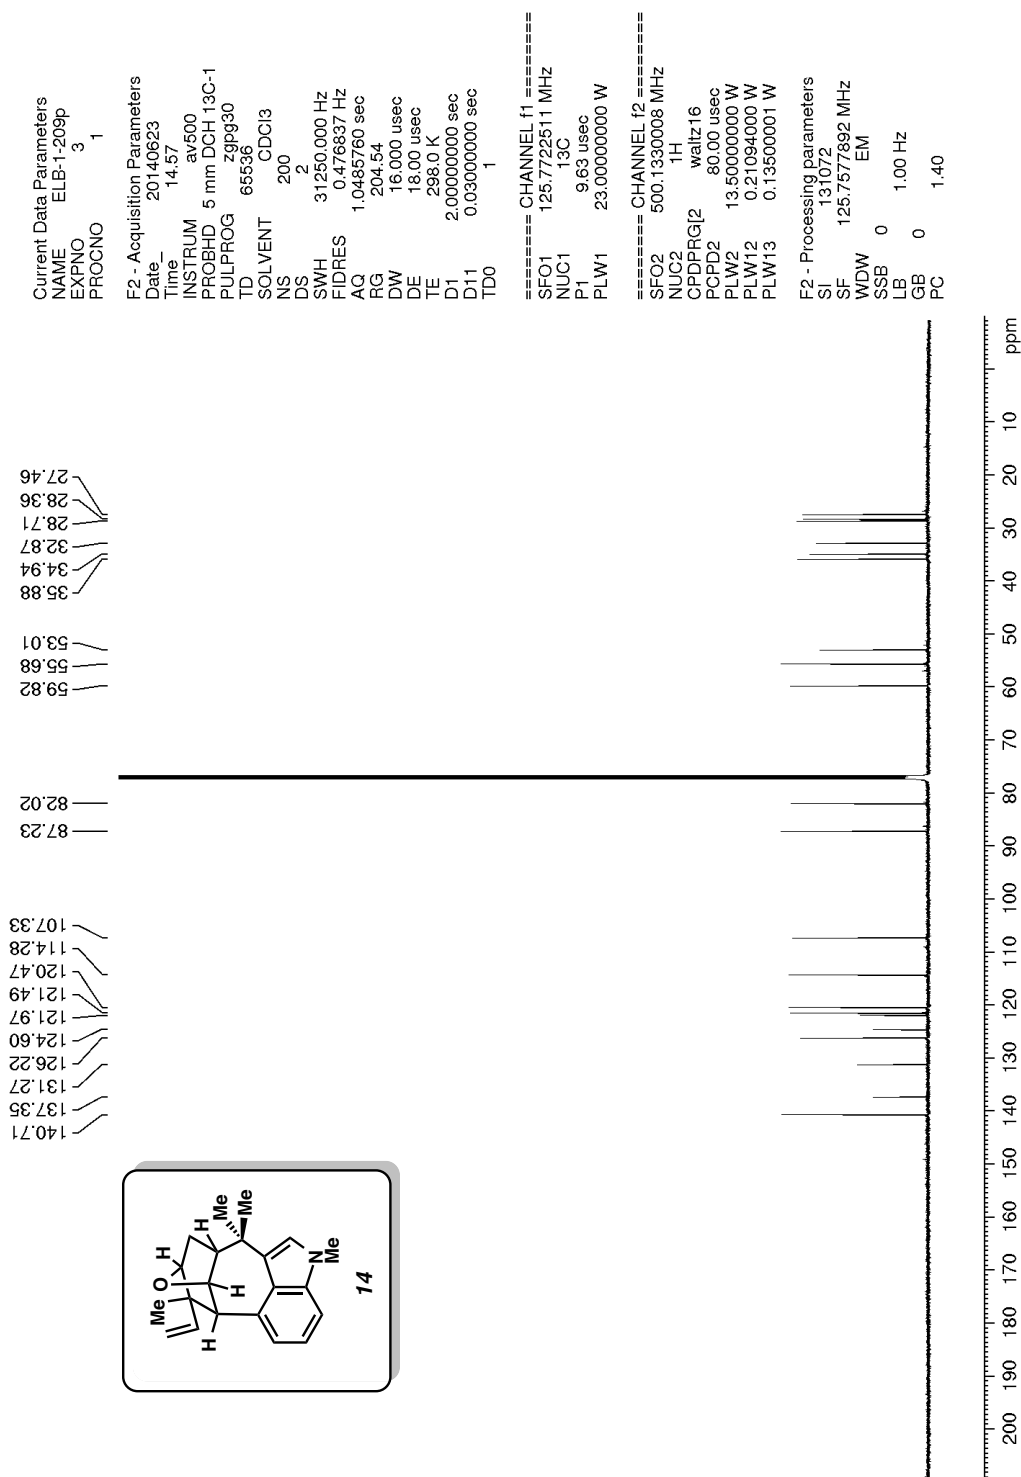

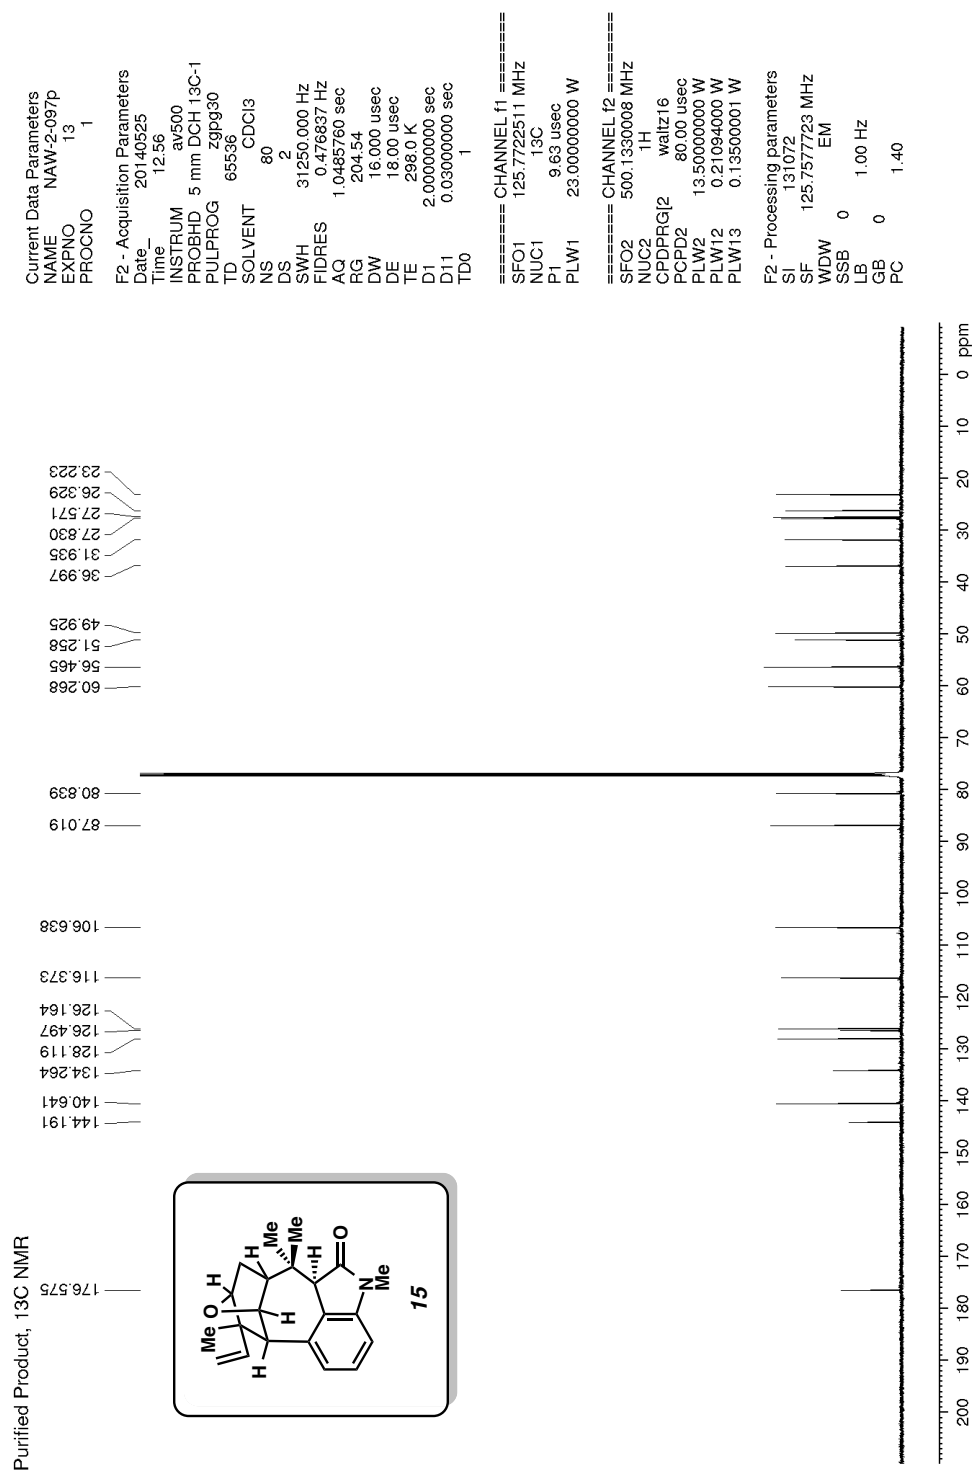

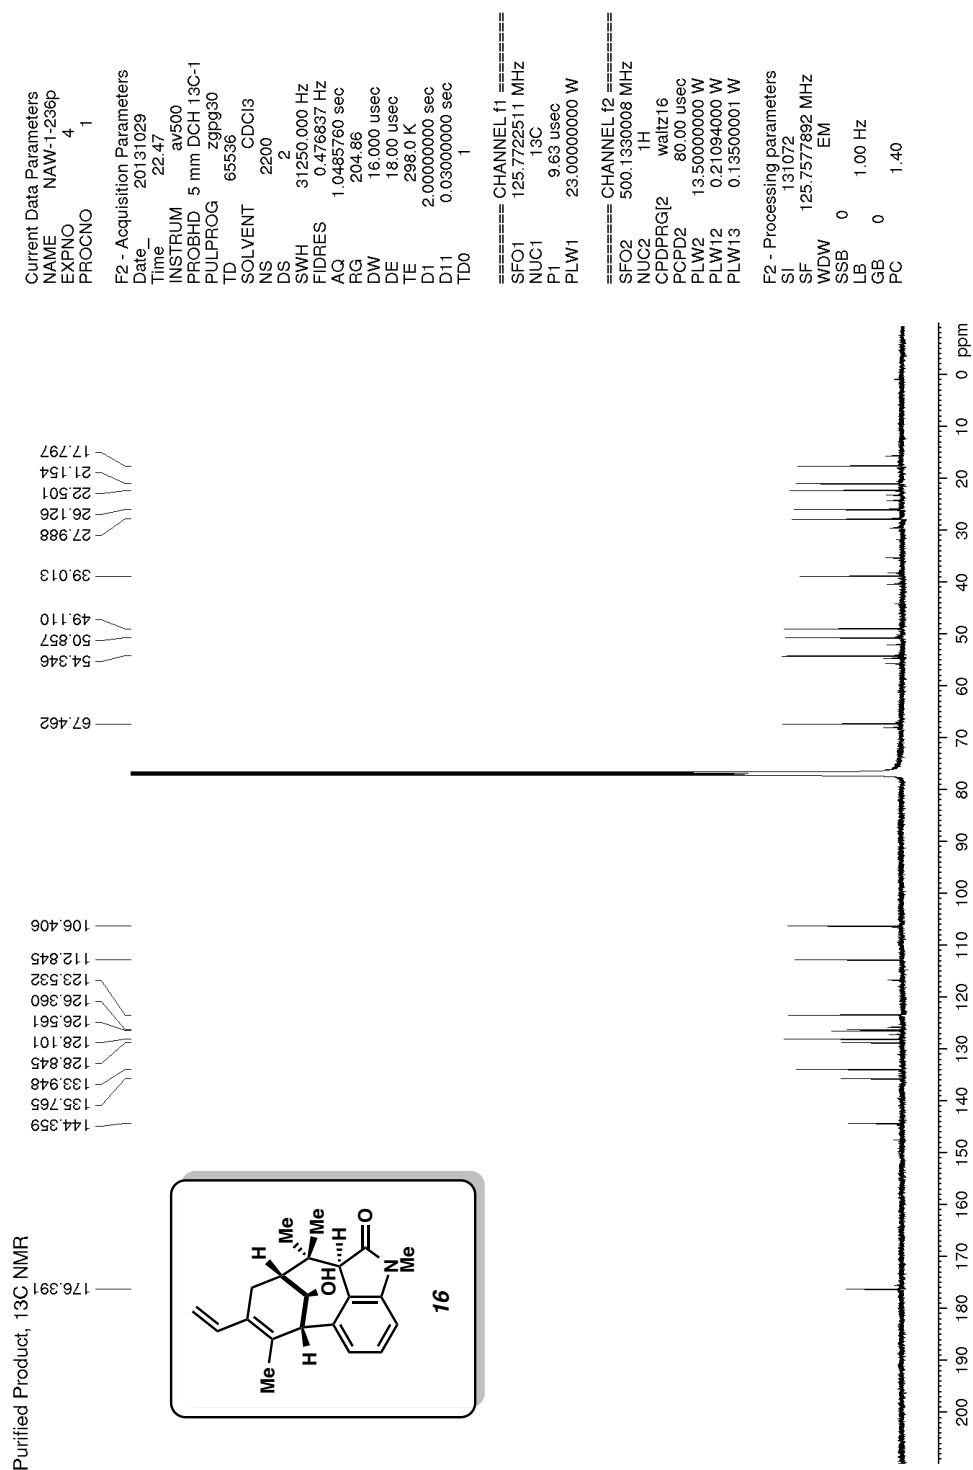

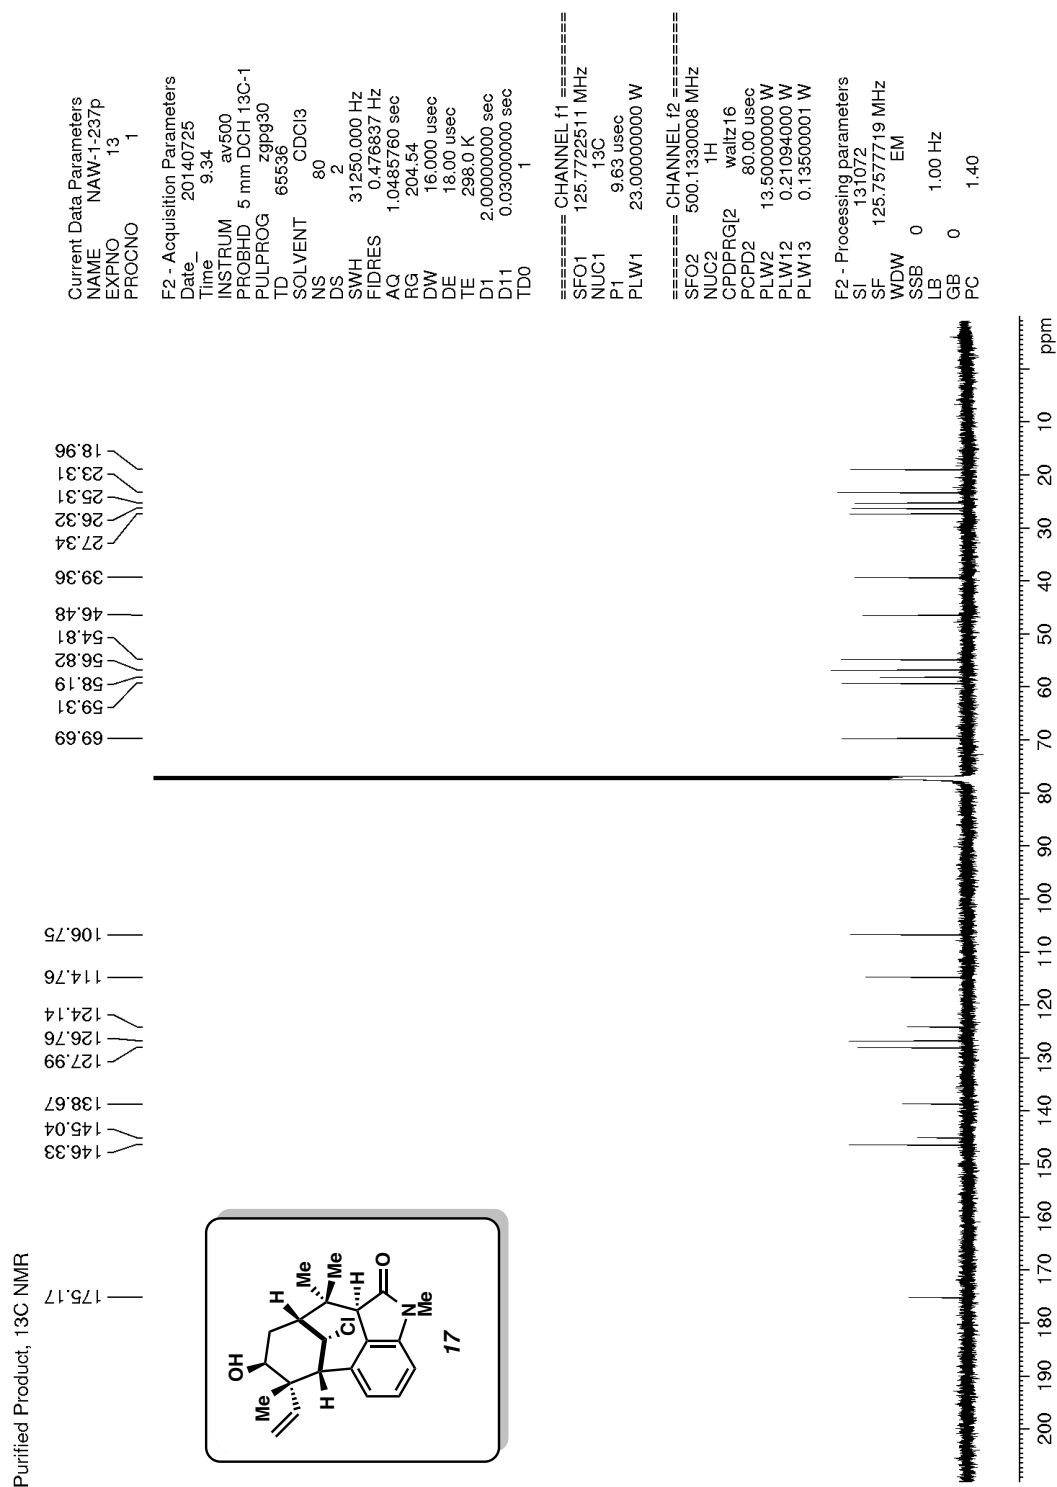

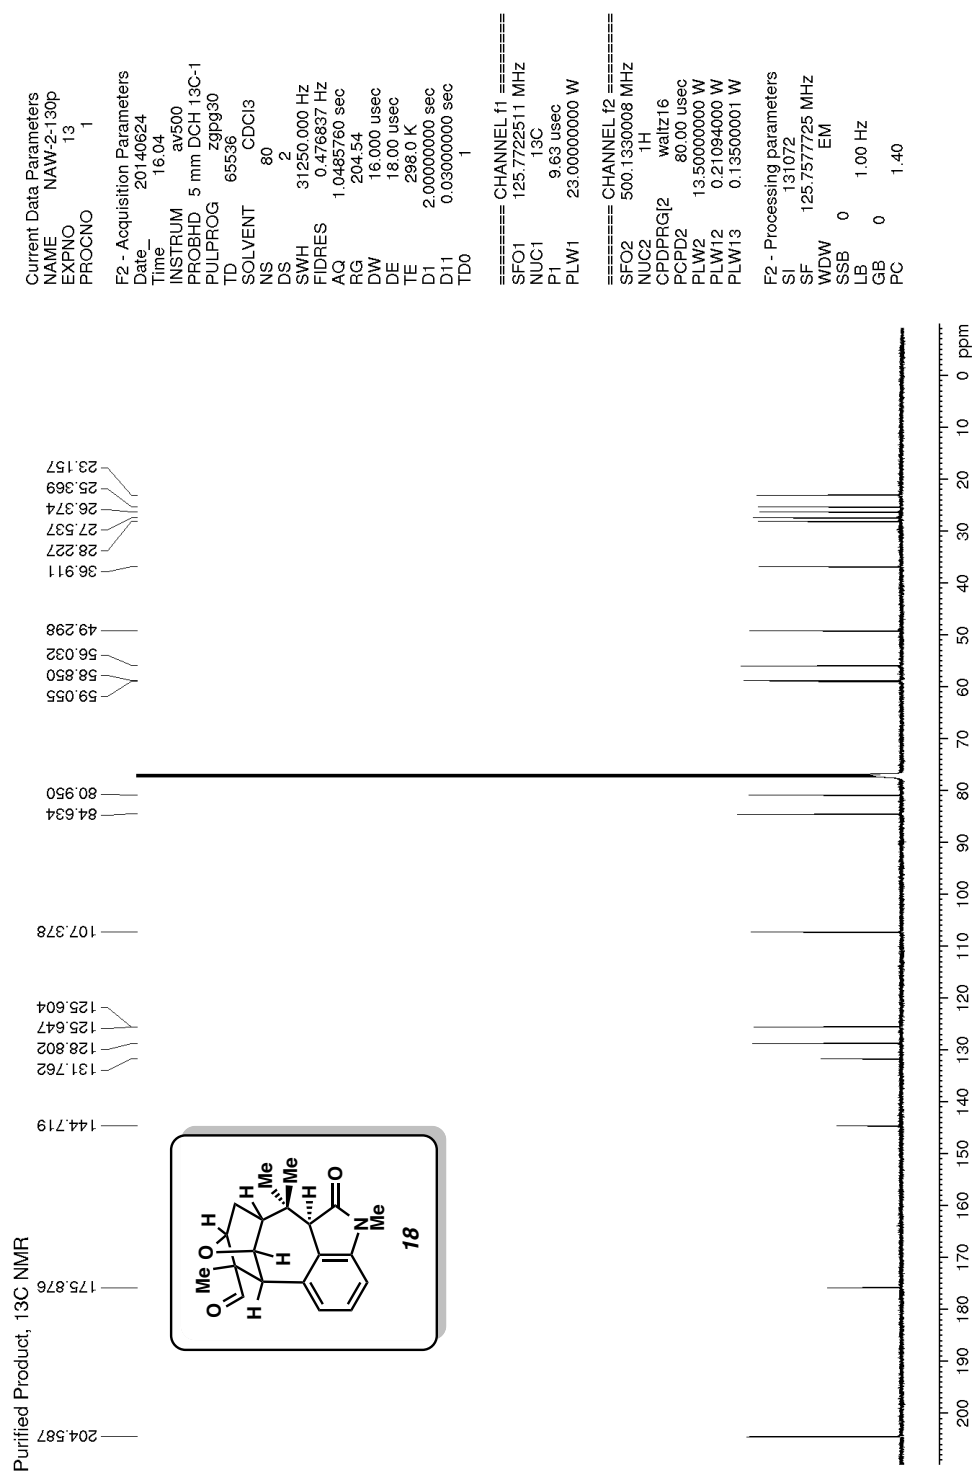

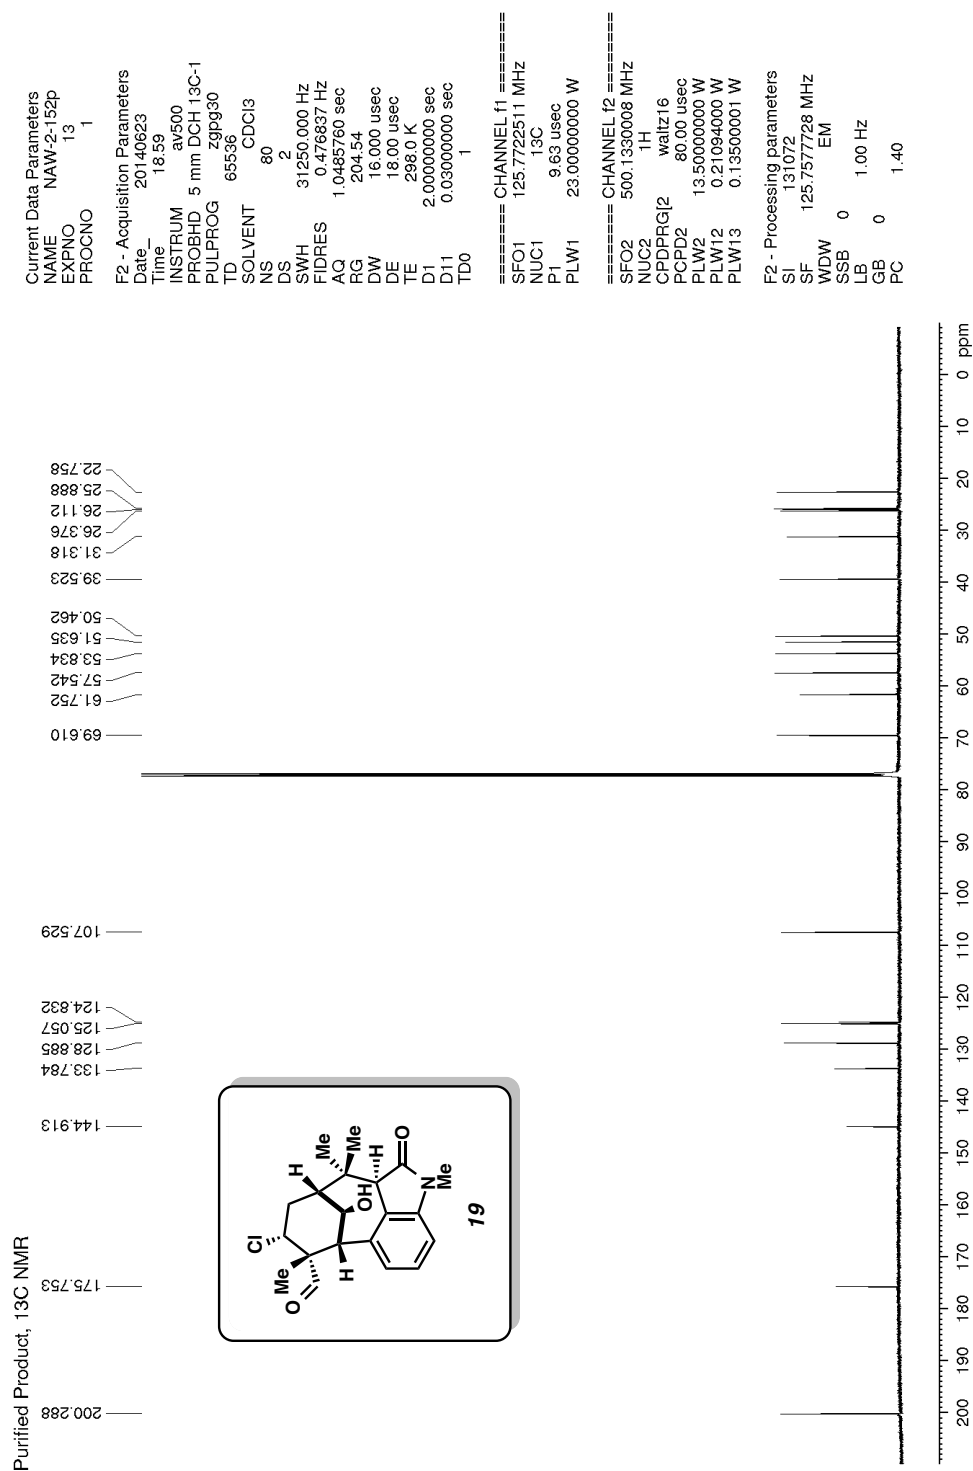



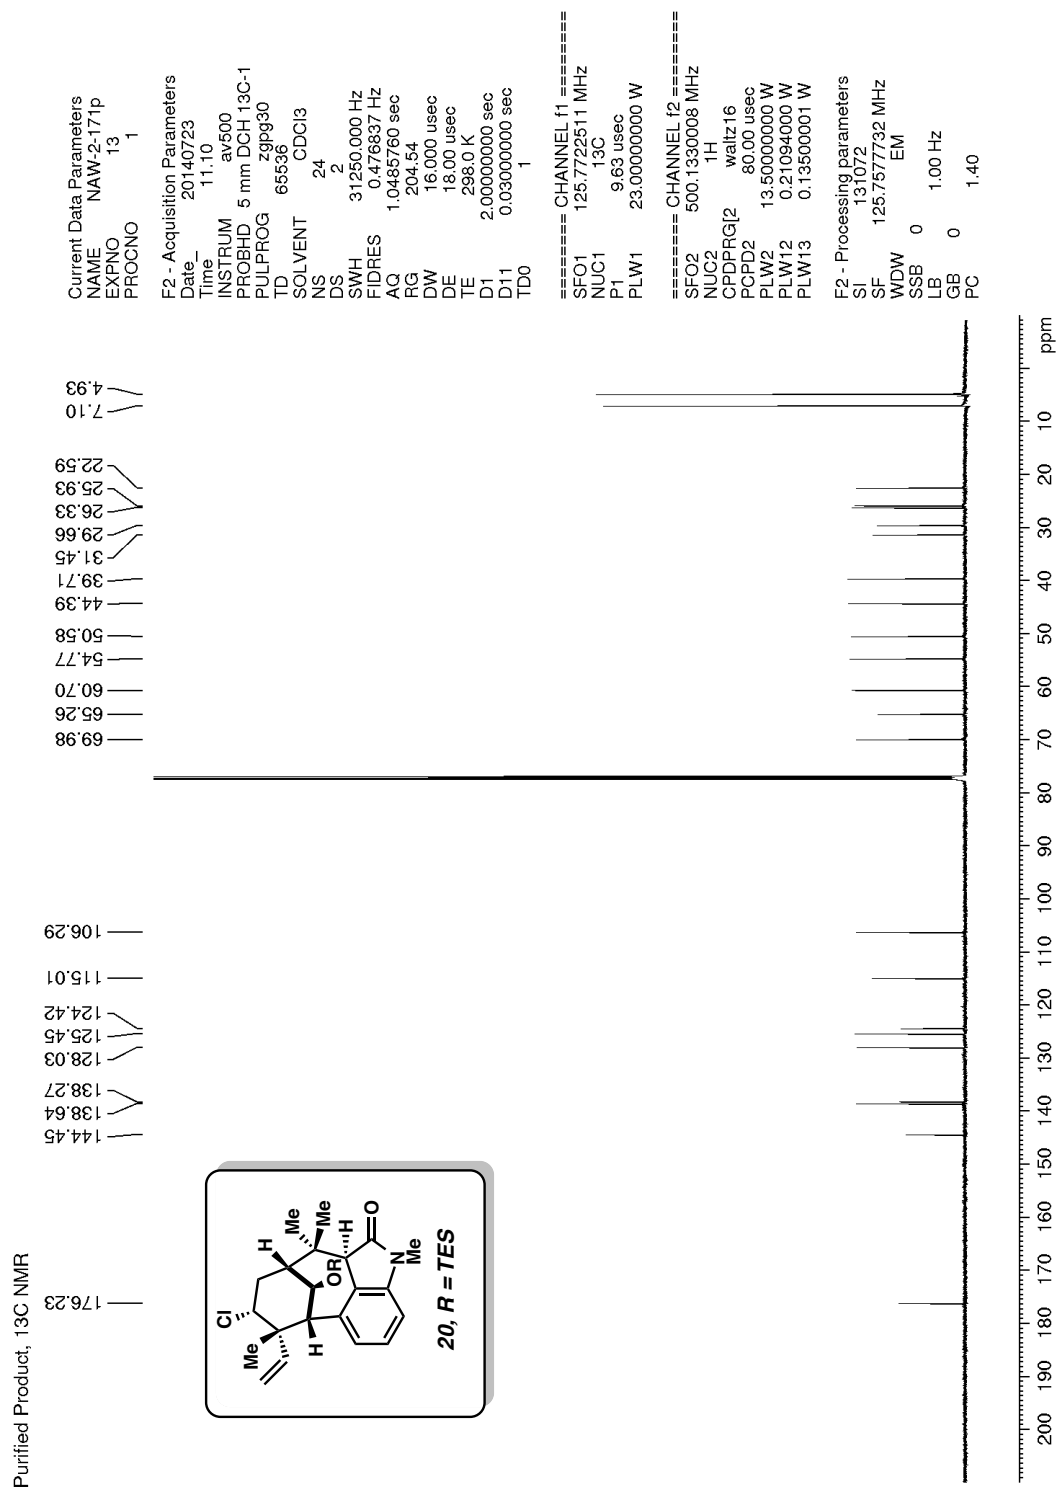

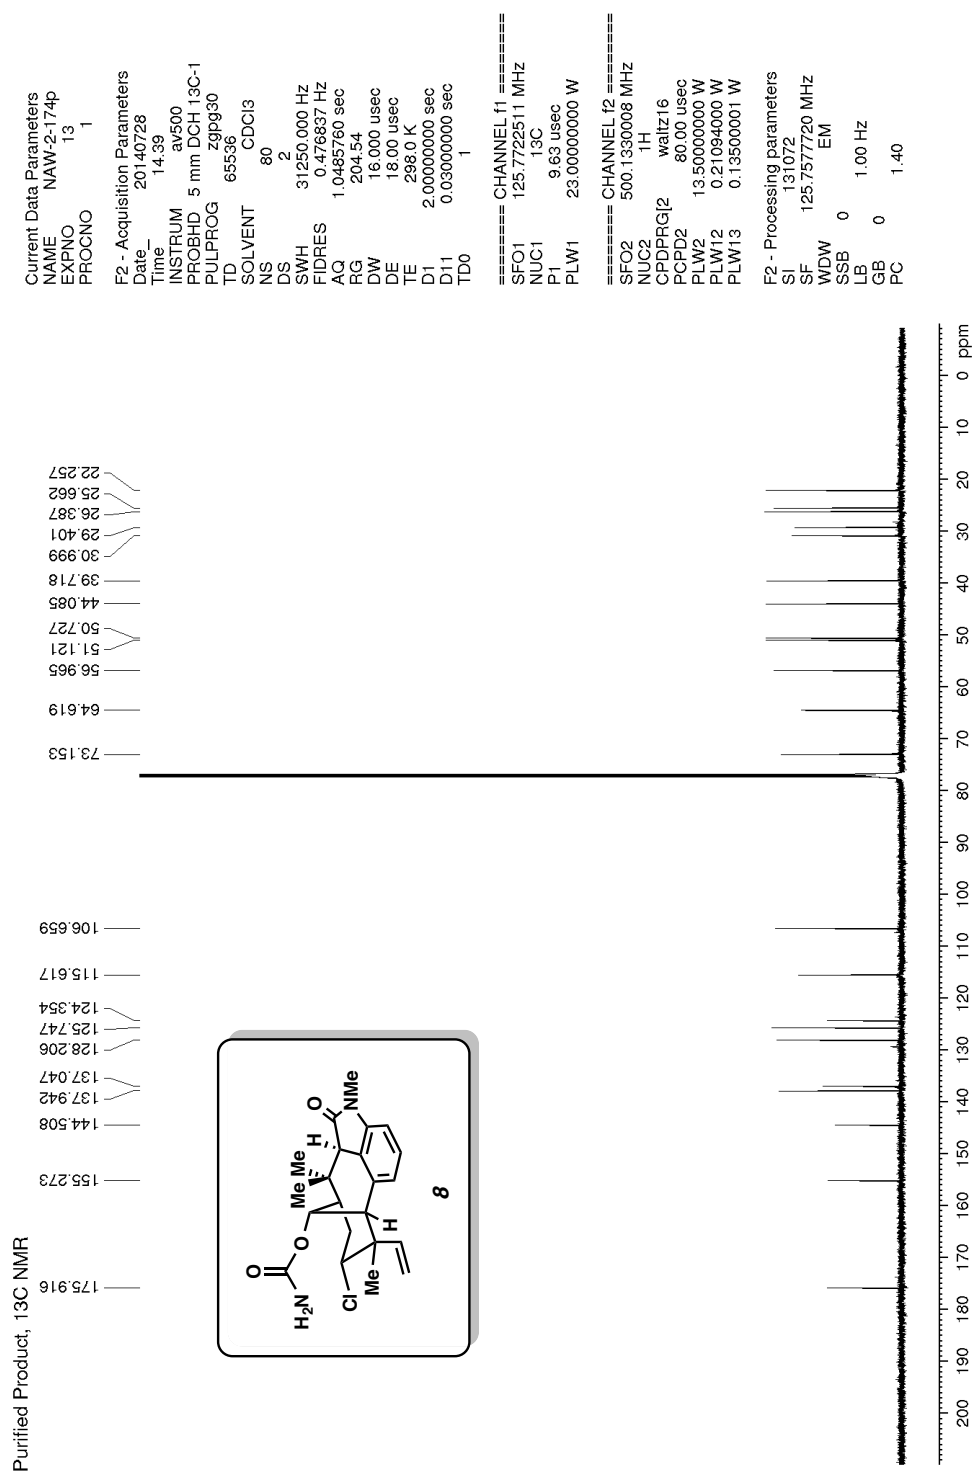

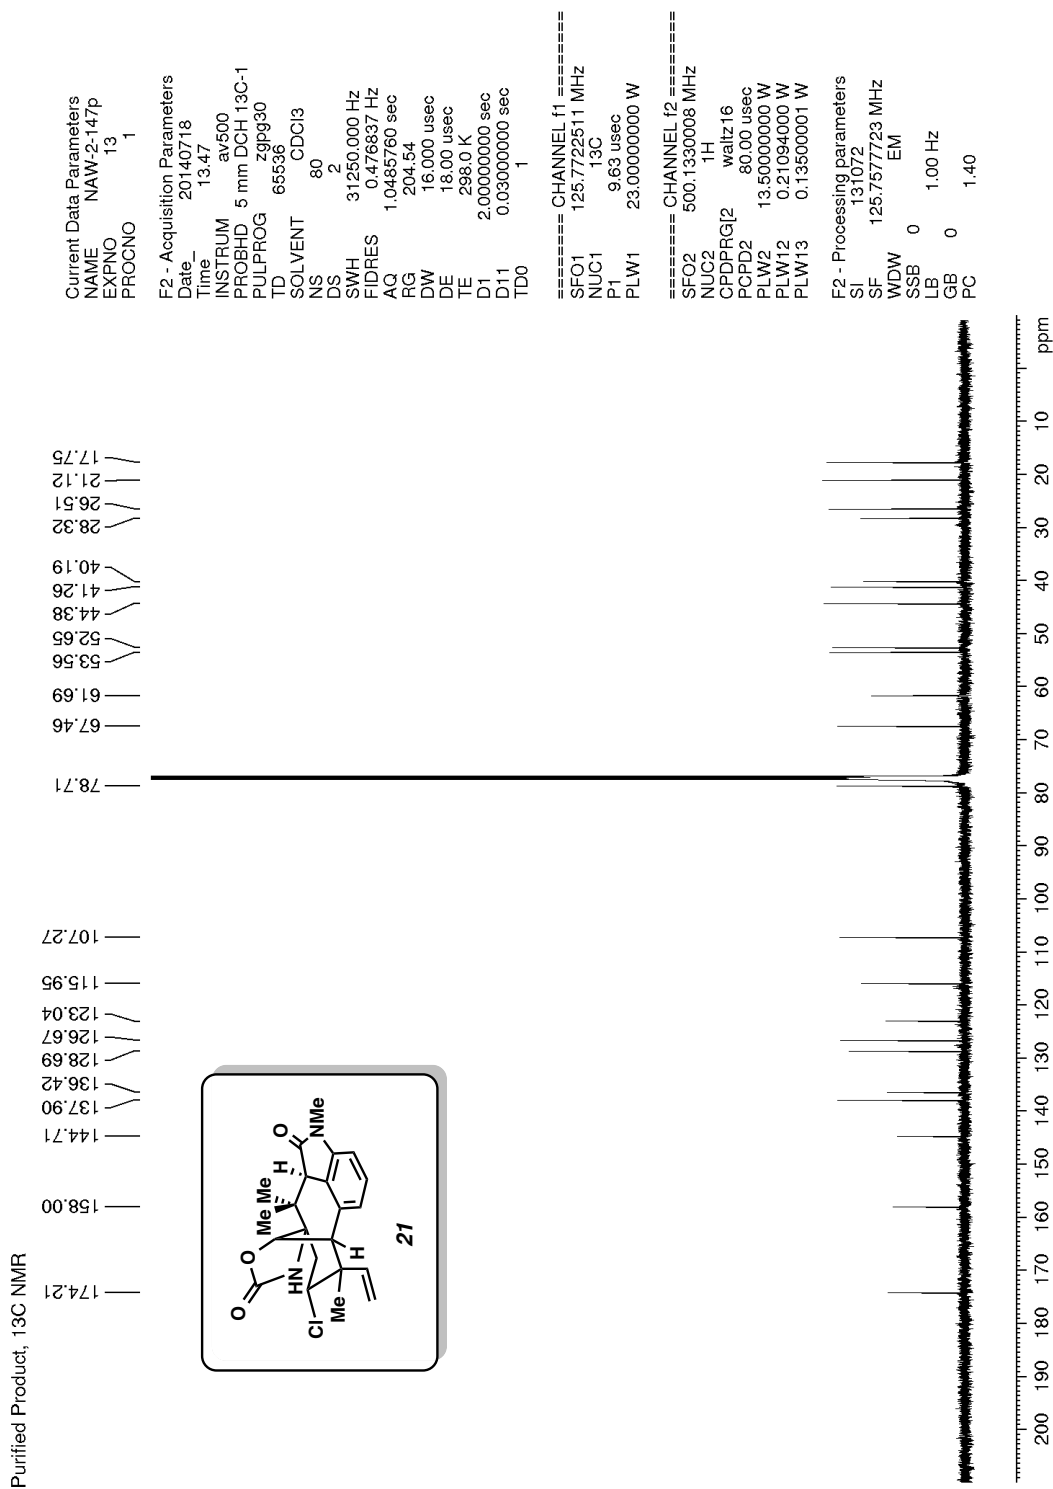

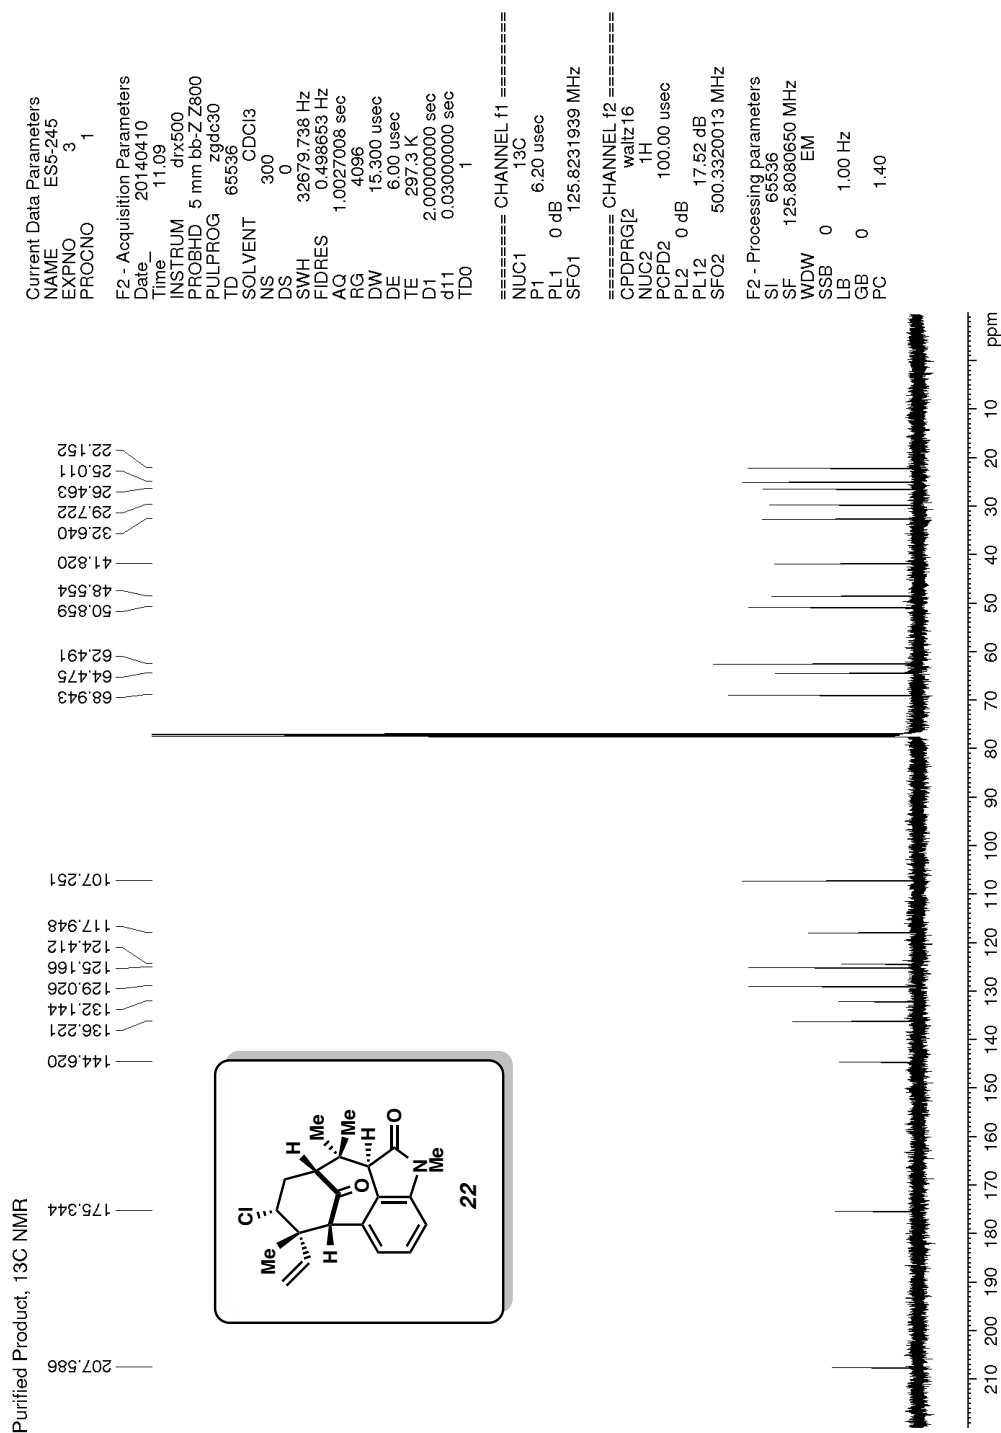

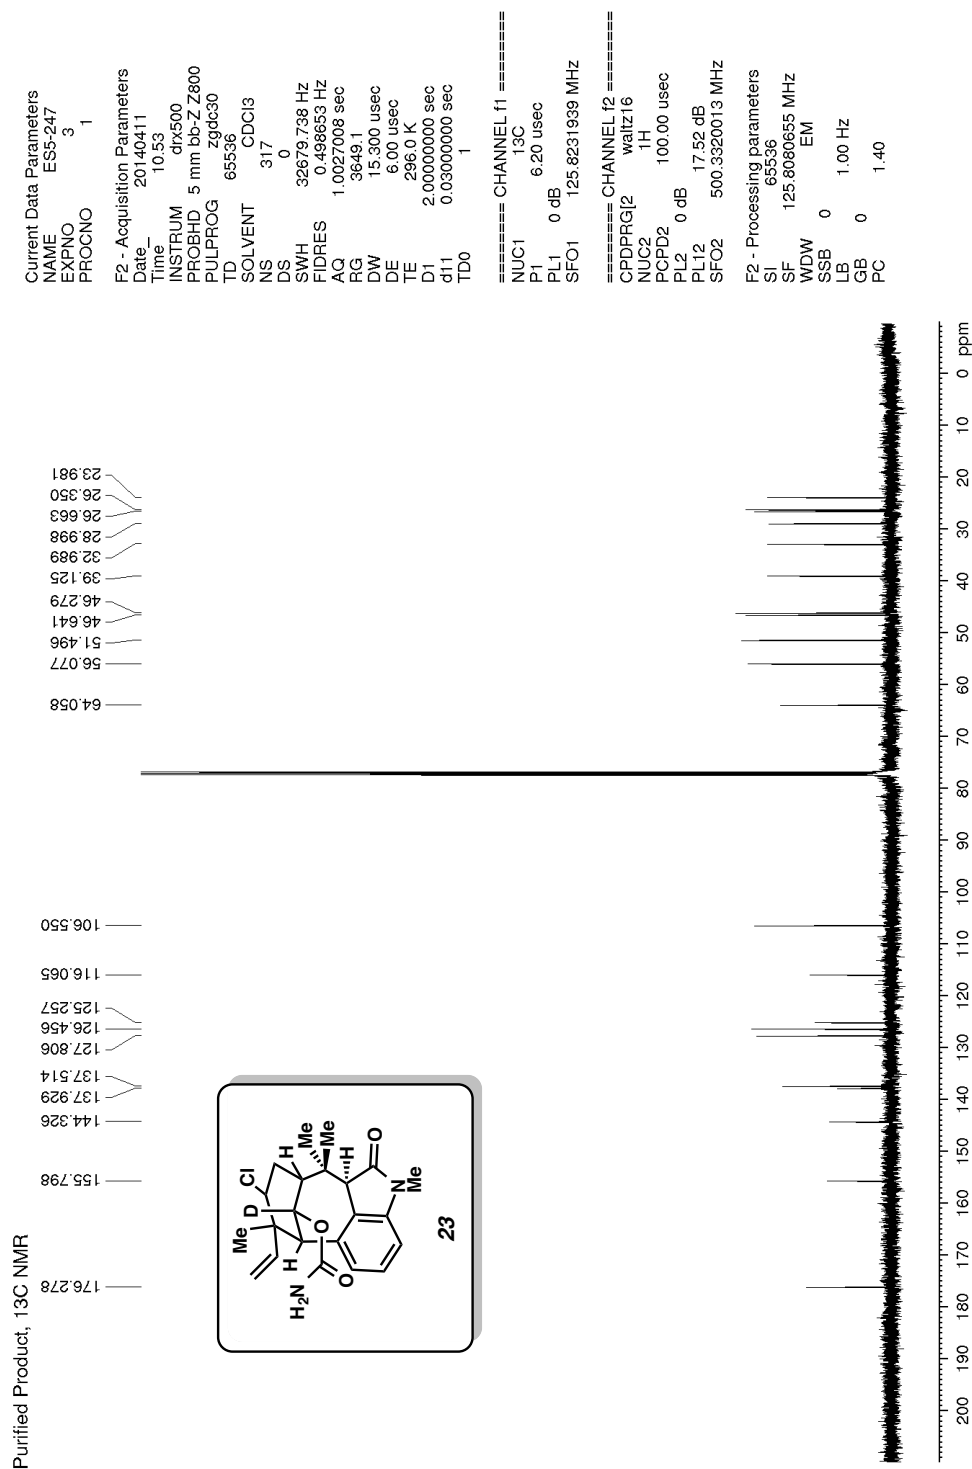

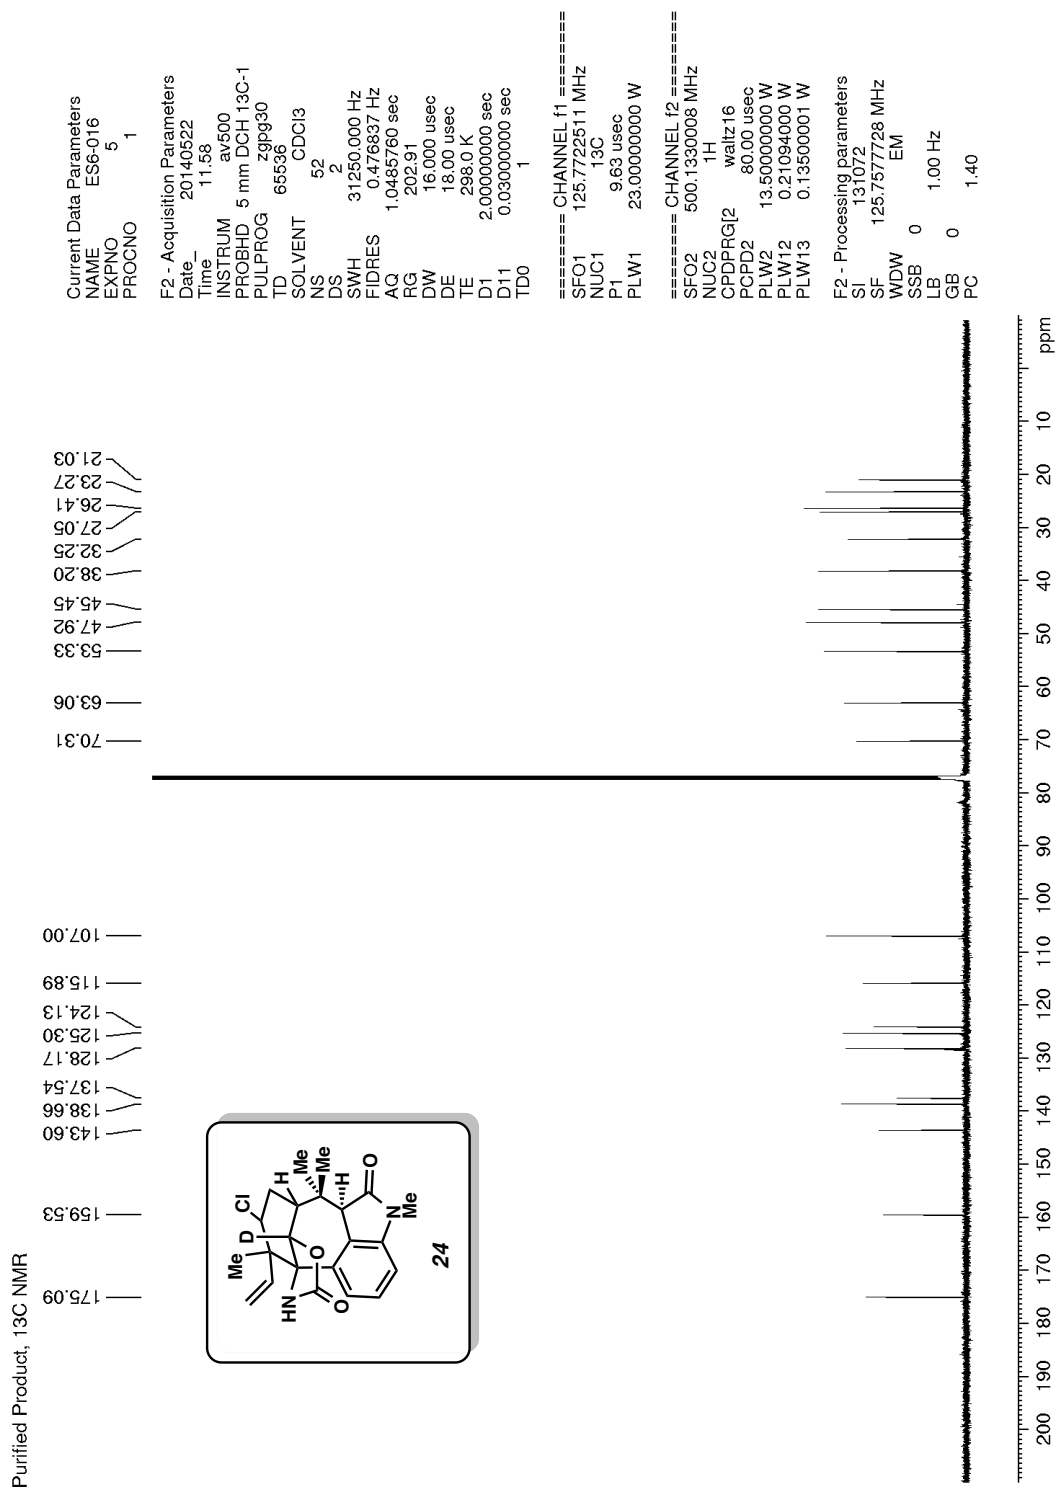

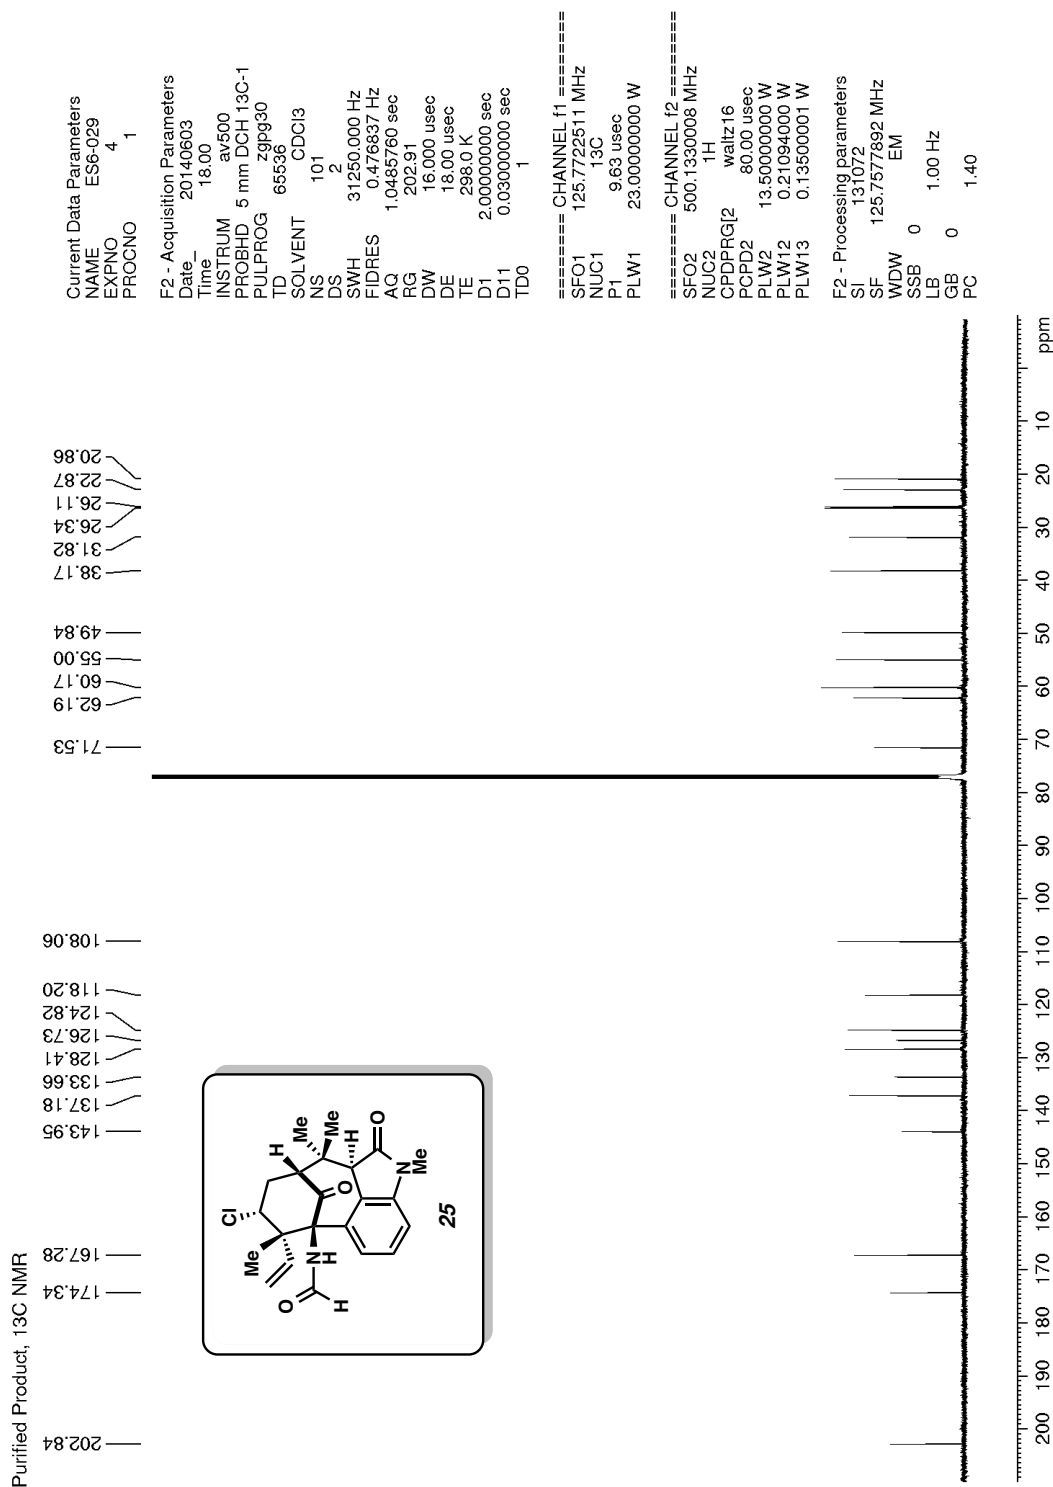

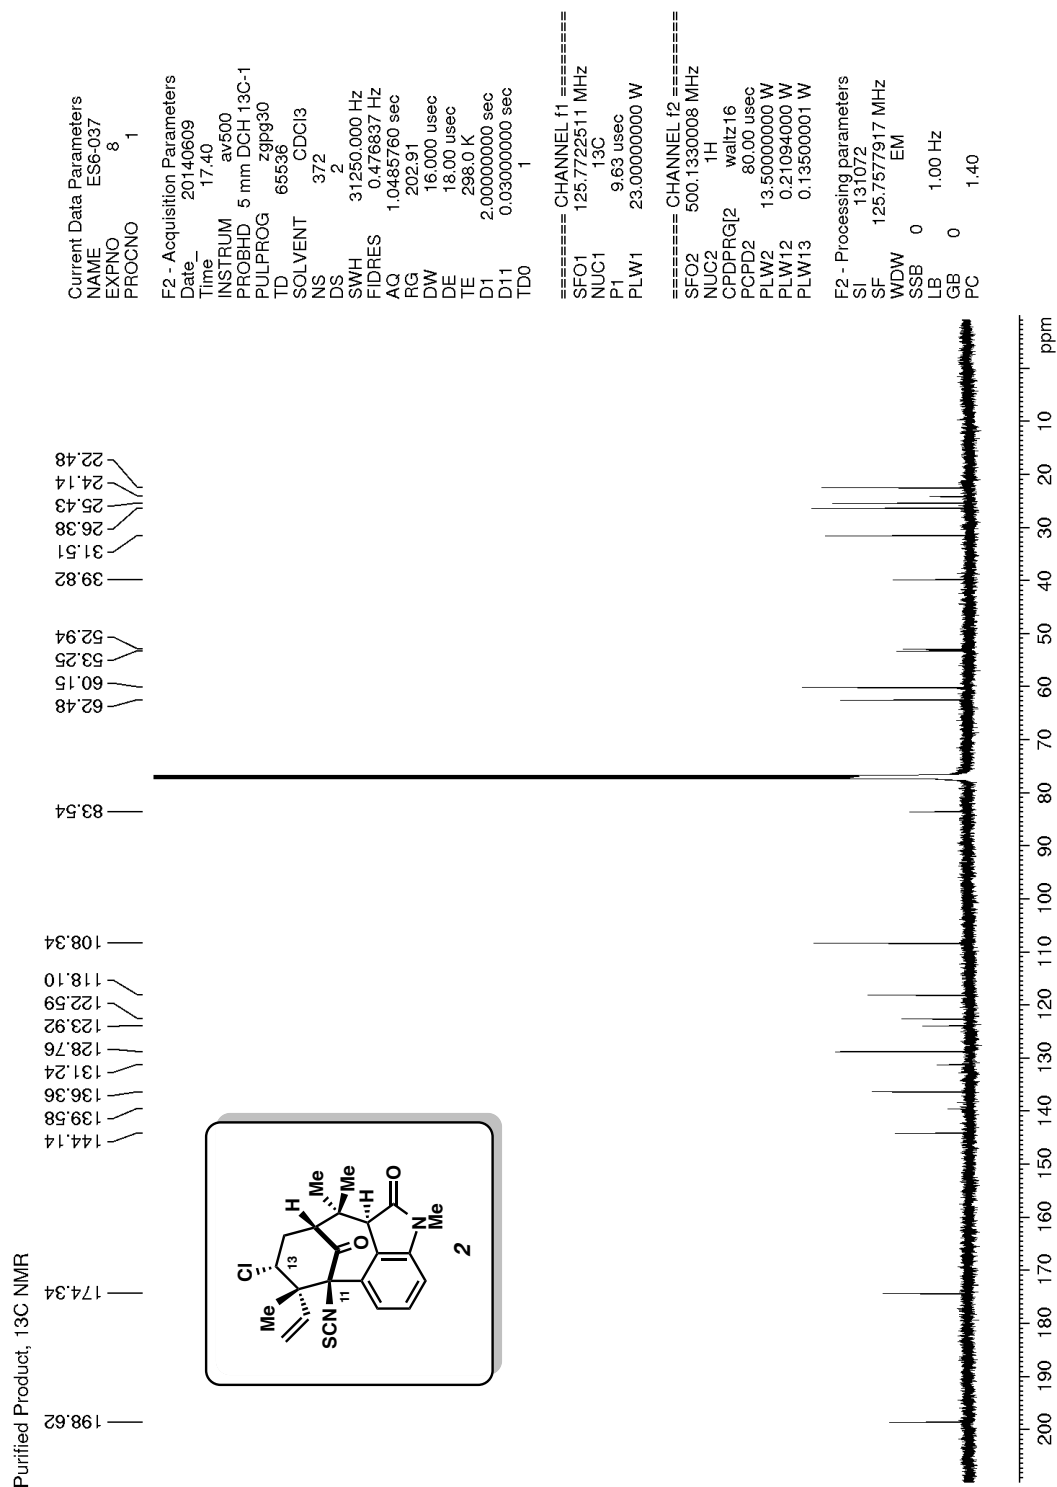



## **2-Dimensional NMR Spectrum for Oxindole 15:**

NOESY, Oxindole 15

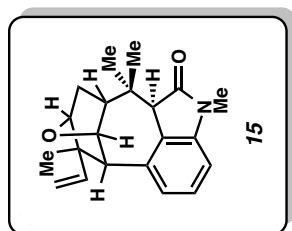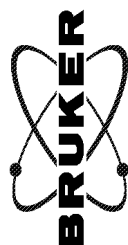

Current Data Parameters  
 NAME NMW-2-16dp  
 EXPNO 12  
 PROCNO 1

F2 - Acquisition Parameters  
 Date\_ 20140727  
 Time 19.13  
 INSTRUM av500  
 PROBD 5 mm BCH 13C-1  
 PULPROG noesyprde  
 SOLVENT CDCl3  
 NS 6  
 DS 8  
 SWH 4000.000 Hz  
 FIDRES 1.953125 Hz  
 AQ 0.2560500 sec  
 RG 12.14  
 DW 125.000 usec  
 DE 10.00 usec  
 ZF 500.132 MHz  
 D1 0.0001327 sec  
 D11 2.0000000 sec  
 D8 0.7500000 sec  
 D16 0.0002000 sec  
 INO 0.0002500 sec

CHANNEL f1  
 SF01 500.1320005 MHz  
 NUC1 1H  
 P1 10.00 usec  
 F2 20.00 usec

F1 - Acquisition parameters  
 ND0 1  
 TD 256  
 SF01 500.132 MHz  
 FIDRES 15.625000 Hz  
 SW 7.998 ppm  
 FMODE States-TPPI

F2 - Processing parameters  
 SI 32768  
 SF 500.1300146 MHz  
 WDW QSI  
 SSB 2  
 LB 0.00 Hz  
 GB 0  
 PC 1.00

F1 - Processing parameters  
 SI 2048  
 SF 500.1300146 MHz  
 WDW QSI  
 SSB 2  
 LB 0.00 Hz  
 GB 0

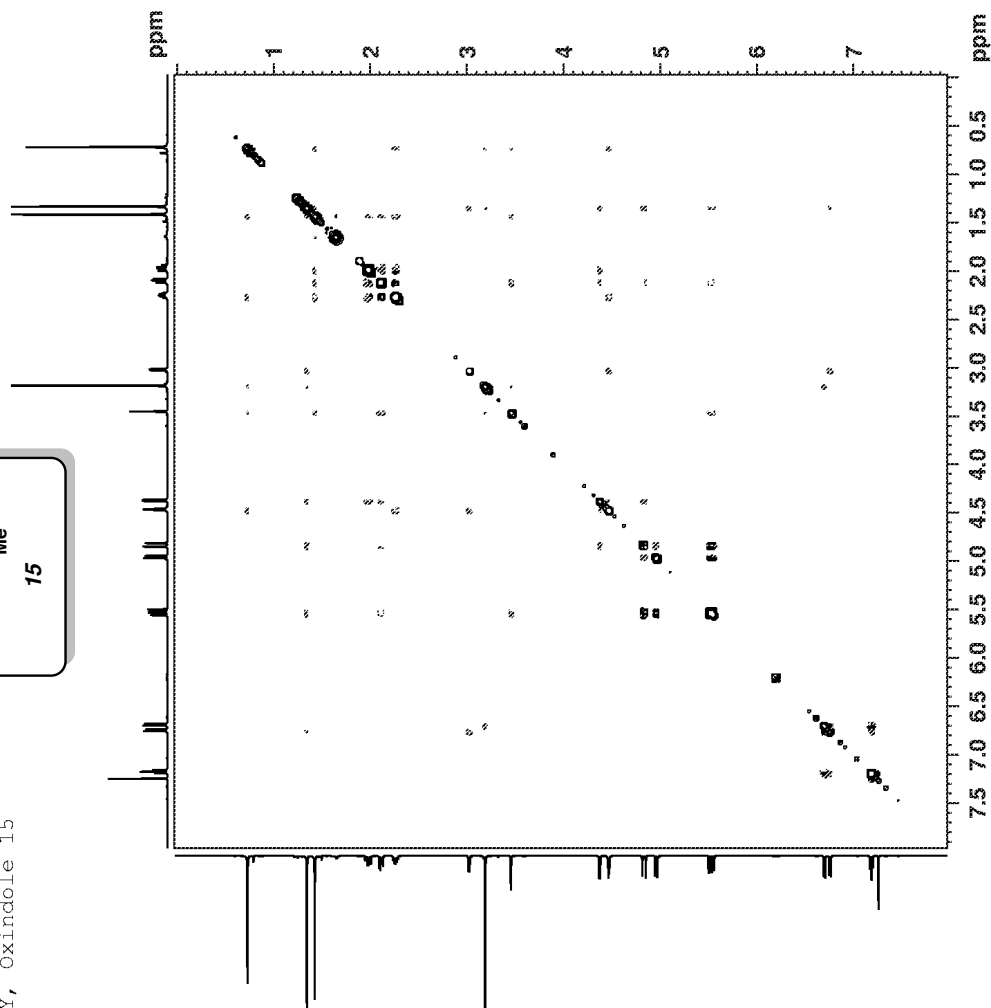

Supplement: Supplementary file 1 [file 3613857]
